# Supplementary material for: Unusual Structures and Cytotoxicities of Chitonoidosides A, A1, B, C, D, and E, Six Triterpene Glycosides from the Far Eastern Sea Cucumber Psolus chitonoides
Source: MDPI journal article supplement (doi:10.3390/md19080449), 2021-08-05
Supplement: s1 [file s1]

**Title: Unusual Structures and Cytotoxicities of Chitonoidosides A, A<sub>1</sub>, B, C, D and E, Six Triterpene Glycosides from the Far Eastern Sea Cucumber *Psolus chitonoides***

**Authors:** Alexandra S. Silchenko<sup>\*1</sup>, Anatoly I. Kalinovsky<sup>1</sup>, Sergey A. Avilov<sup>1</sup>, Pelageya V. Andrijaschenko<sup>1</sup>, Roman S. Popov<sup>1</sup>, Ekaterina A. Chingizova<sup>1</sup>, Vladimir I. Kalinin<sup>1</sup> and Stonik V.A.<sup>1</sup>

**Address:** <sup>1</sup>G.B. Elyakov Pacific Institute of Bioorganic Chemistry, Far Eastern Branch of Russian Academy of Sciences, Pr. 100-let Vladivostoku 159, 690022 Vladivostok, Russia

**Correspondence:** sialexandra@mail.ru; Tel.: +7-423-231-1168

**Contents:**

Figure S1. The <sup>13</sup>C NMR (176.03 MHz) spectrum of chitonoidoside A (**1**) in C<sub>5</sub>D<sub>5</sub>N/D<sub>2</sub>O (4/1)

Figure S2. The <sup>1</sup>H NMR (700.00 MHz) spectrum of chitonoidoside A (**1**) in C<sub>5</sub>D<sub>5</sub>N/D<sub>2</sub>O (4/1)

Figure S3. The COSY (700.00 MHz) spectrum of chitonoidoside A (**1**) in C<sub>5</sub>D<sub>5</sub>N/D<sub>2</sub>O (4/1)

Figure S4. The HSQC (700.00 MHz) spectrum of chitonoidoside A (**1**) in C<sub>5</sub>D<sub>5</sub>N/D<sub>2</sub>O (4/1)

Figure S5. The ROESY (700.00 MHz) spectrum of chitonoidoside A (**1**) in C<sub>5</sub>D<sub>5</sub>N/D<sub>2</sub>O (4/1)

Figure S6. The HMBC (700.00 MHz) spectrum of chitonoidoside A (**1**) in C<sub>5</sub>D<sub>5</sub>N/D<sub>2</sub>O (4/1)

Figure S7. HR-ESI-MS and ESI-MS/MS spectra of chitonoidoside A (**1**)

Table S1. <sup>13</sup>C and <sup>1</sup>H NMR chemical shifts, HMBC and ROESY correlations of carbohydrate moiety of chitonoidoside A<sub>1</sub> (**2**)

Figure S8. The <sup>13</sup>C NMR (176.03 MHz) spectrum of chitonoidoside A<sub>1</sub> (**2**) in C<sub>5</sub>D<sub>5</sub>N/D<sub>2</sub>O (4/1)

Figure S9. The <sup>1</sup>H NMR (700.00 MHz) spectrum of chitonoidoside A<sub>1</sub> (**2**) in C<sub>5</sub>D<sub>5</sub>N/D<sub>2</sub>O (4/1)

Figure S10. The COSY (700.00 MHz) spectrum of chitonoidoside A<sub>1</sub> (**2**) in C<sub>5</sub>D<sub>5</sub>N/D<sub>2</sub>O (4/1)

Figure S11. The HSQC (700.00 MHz) spectrum of chitonoidoside A<sub>1</sub> (**2**) in C<sub>5</sub>D<sub>5</sub>N/D<sub>2</sub>O (4/1)

Figure S12. The HMBC (700.00 MHz) spectrum of chitonoidoside A<sub>1</sub> (**2**) in C<sub>5</sub>D<sub>5</sub>N/D<sub>2</sub>O (4/1)

Figure S13. The ROESY (700.00 MHz) spectrum of chitonoidoside A<sub>1</sub> (**2**) in C<sub>5</sub>D<sub>5</sub>N/D<sub>2</sub>O (4/1)

Figure S14. HR-ESI-MS and ESI-MS/MS spectra of chitonoidoside A<sub>1</sub> (2)

Table S2. <sup>13</sup>C and <sup>1</sup>H NMR chemical shifts, HMBC and ROESY correlations of the aglycone part of chitonoidoside B (3)

Figure S15. The <sup>13</sup>C NMR (176.03 MHz) spectrum of chitonoidoside B (3) in C<sub>5</sub>D<sub>5</sub>N/D<sub>2</sub>O (4/1)

Figure S16. The <sup>1</sup>H NMR (700.00 MHz) spectrum of chitonoidoside B (3) in C<sub>5</sub>D<sub>5</sub>N/D<sub>2</sub>O (4/1)

Figure S17. The COSY (700.00 MHz) spectrum of chitonoidoside B (3) in C<sub>5</sub>D<sub>5</sub>N/D<sub>2</sub>O (4/1)

Figure S18. The HSQC (700.00 MHz) spectrum of chitonoidoside B (3) in C<sub>5</sub>D<sub>5</sub>N/D<sub>2</sub>O (4/1)

Figure S19. The HMBC (700.00 MHz) spectrum of chitonoidoside B (3) in C<sub>5</sub>D<sub>5</sub>N/D<sub>2</sub>O (4/1)

Figure S20. The ROESY (700.00 MHz) spectrum of chitonoidoside B (3) in C<sub>5</sub>D<sub>5</sub>N/D<sub>2</sub>O (4/1)

Figure S21. 1 D TOCSY (700.00 MHz) spectra of Xyl1, Qui2 and Xyl3 of chitonoidoside B (3) in C<sub>5</sub>D<sub>5</sub>N/D<sub>2</sub>O (4/1)

Figure S22. 1 D TOCSY (700.00 MHz) spectra of MeGlc4, Glc5 and MeXyl6 of chitonoidoside B (3) in C<sub>5</sub>D<sub>5</sub>N/D<sub>2</sub>O (4/1)

Figure S23. HR-ESI-MS and ESI-MS/MS spectra of chitonoidoside B (3)

Table S3. <sup>13</sup>C and <sup>1</sup>H NMR chemical shifts, HMBC and ROESY correlations of the aglycone part of chitonoidoside C (4)

Figure S24. The <sup>13</sup>C NMR (176.03 MHz) spectrum of chitonoidoside C (4) in C<sub>5</sub>D<sub>5</sub>N/D<sub>2</sub>O (4/1)

Figure S25. The <sup>1</sup>H NMR (700.00 MHz) spectrum of chitonoidoside C (4) in C<sub>5</sub>D<sub>5</sub>N/D<sub>2</sub>O (4/1)

Figure S26. The COSY (700.00 MHz) spectrum of chitonoidoside C (4) in C<sub>5</sub>D<sub>5</sub>N/D<sub>2</sub>O (4/1)

Figure S27. The HSQC (700.00 MHz) spectrum of chitonoidoside C (4) in C<sub>5</sub>D<sub>5</sub>N/D<sub>2</sub>O (4/1)

Figure S28. The ROESY (700.00 MHz) spectrum of chitonoidoside C (4) in C<sub>5</sub>D<sub>5</sub>N/D<sub>2</sub>O (4/1)

Figure S29. The HMBC (700.00 MHz) spectrum of chitonoidoside C (4) in C<sub>5</sub>D<sub>5</sub>N/D<sub>2</sub>O (4/1)

Figure S30. 1 D TOCSY (700.00 MHz) spectra of chitonoidoside C (4) in C<sub>5</sub>D<sub>5</sub>N/D<sub>2</sub>O (4/1)

Figure S31. HR-ESI-MS and ESI-MS/MS spectra of chitonoidoside C (4)

Table S4.  $^{13}\text{C}$  and  $^1\text{H}$  NMR chemical shifts, HMBC and ROESY correlations of the aglycone part of chitonoidoside D (5)

Figure S32. The  $^{13}\text{C}$  NMR (176.03 MHz) spectrum of chitonoidoside D (5) in  $\text{C}_5\text{D}_5\text{N}/\text{D}_2\text{O}$  (4/1)

Figure S33. The  $^1\text{H}$  NMR (700.00 MHz) spectrum of chitonoidoside D (5) in  $\text{C}_5\text{D}_5\text{N}/\text{D}_2\text{O}$  (4/1)

Figure S34. The COSY (700.00 MHz) spectrum of chitonoidoside D (5) in  $\text{C}_5\text{D}_5\text{N}/\text{D}_2\text{O}$  (4/1)

Figure S35. The HSQC (700.00 MHz) spectrum of chitonoidoside D (5) in  $\text{C}_5\text{D}_5\text{N}/\text{D}_2\text{O}$  (4/1)

Figure S36. The HMBC (700.00 MHz) spectrum of chitonoidoside D (5) in  $\text{C}_5\text{D}_5\text{N}/\text{D}_2\text{O}$  (4/1)

Figure S37. The ROESY (700.00 MHz) spectrum of chitonoidoside D (5) in  $\text{C}_5\text{D}_5\text{N}/\text{D}_2\text{O}$  (4/1)

Figure S38. 1D TOCSY (700.00 MHz) spectra of chitonoidoside D (5) in  $\text{C}_5\text{D}_5\text{N}/\text{D}_2\text{O}$  (4/1)

Figure S39. HR-ESI-MS and ESI-MS/MS spectra of chitonoidoside D (5)

Table S5.  $^{13}\text{C}$  and  $^1\text{H}$  NMR chemical shifts, HMBC and ROESY correlations of the aglycone part of chitonoidoside E (6)

Figure S40. The  $^{13}\text{C}$  NMR (176.03 MHz) spectrum of chitonoidoside E (6) in  $\text{C}_5\text{D}_5\text{N}/\text{D}_2\text{O}$  (4/1)

Figure S41. The  $^1\text{H}$  NMR (700.00 MHz) spectrum of chitonoidoside E (6) in  $\text{C}_5\text{D}_5\text{N}/\text{D}_2\text{O}$  (4/1)

Figure S42. The COSY (700.00 MHz) spectrum of chitonoidoside E (6) in  $\text{C}_5\text{D}_5\text{N}/\text{D}_2\text{O}$  (4/1)

Figure S43. The HSQC (700.00 MHz) spectrum of chitonoidoside E (6) in  $\text{C}_5\text{D}_5\text{N}/\text{D}_2\text{O}$  (4/1)

Figure S44. The ROESY (700.00 MHz) spectrum of chitonoidoside E (6) in  $\text{C}_5\text{D}_5\text{N}/\text{D}_2\text{O}$  (4/1)

Figure S45. The HMBC (700.00 MHz) spectrum of chitonoidoside E (6) in  $\text{C}_5\text{D}_5\text{N}/\text{D}_2\text{O}$  (4/1)

Figure S46. 1D TOCSY (700.00 MHz) spectra of Xyl1, Qui2 and Xyl3 of chitonoidoside E (6) in  $\text{C}_5\text{D}_5\text{N}/\text{D}_2\text{O}$  (4/1)

Figure S47. 1D TOCSY (700.00 MHz) spectra of MeGlc4, Glc5 and MeXyl6 of chitonoidoside E (6) in  $\text{C}_5\text{D}_5\text{N}/\text{D}_2\text{O}$  (4/1)

Figure S48. HR-ESI-MS and ESI-MS/MS spectra of chitonoidoside E (6)



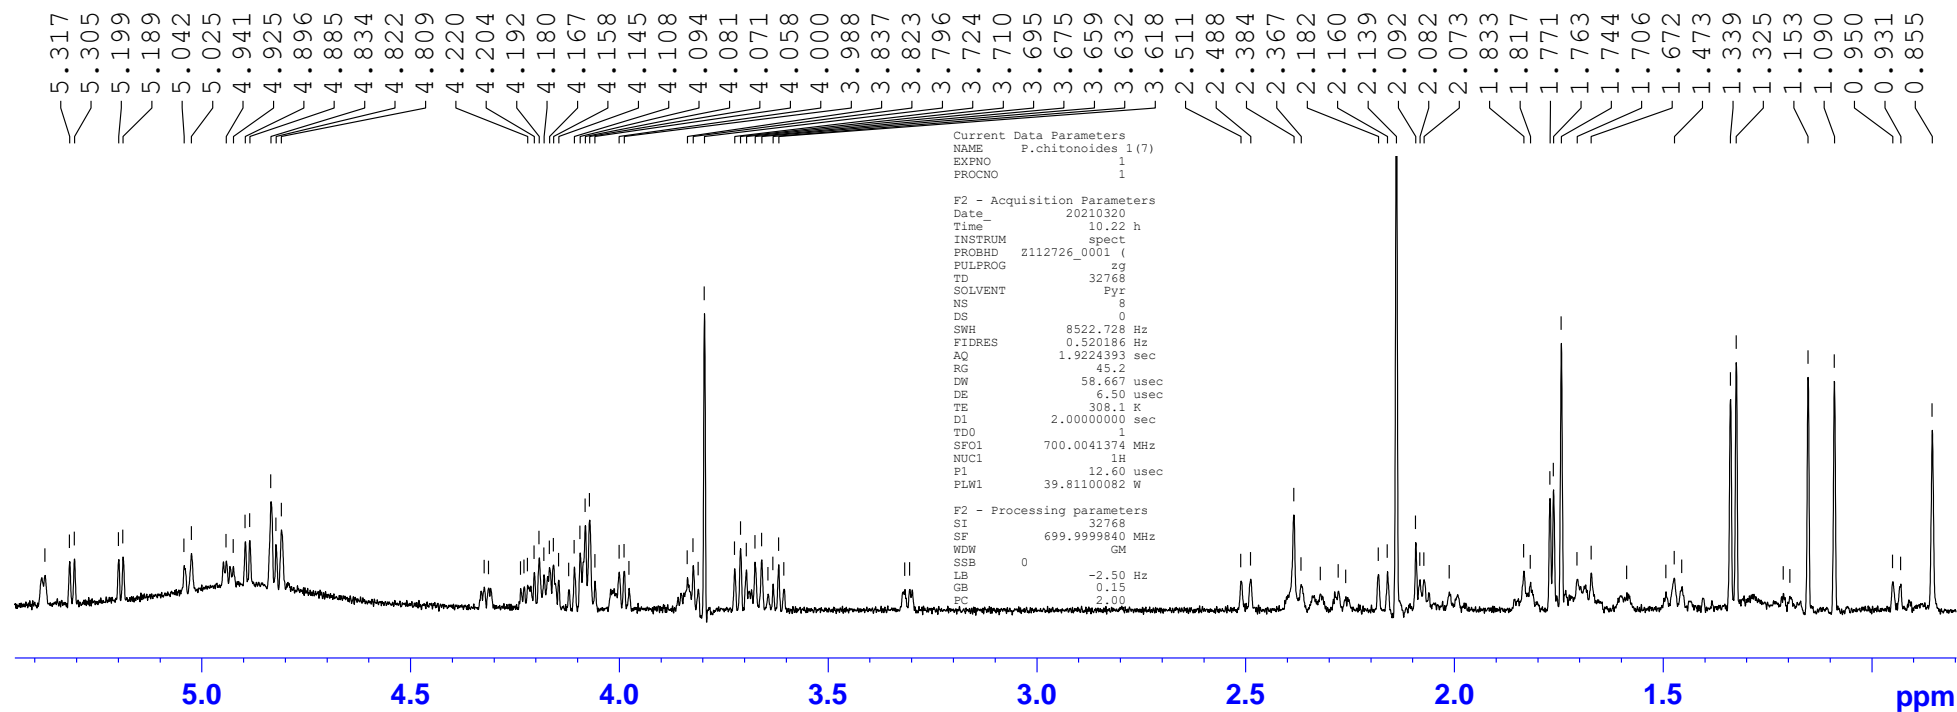

Figure S2. The  $^1\text{H}$  NMR (700.00 MHz) spectrum of chitonoidoside A (**1**) in  $\text{C}_5\text{D}_5\text{N}/\text{D}_2\text{O}$  (4/1)

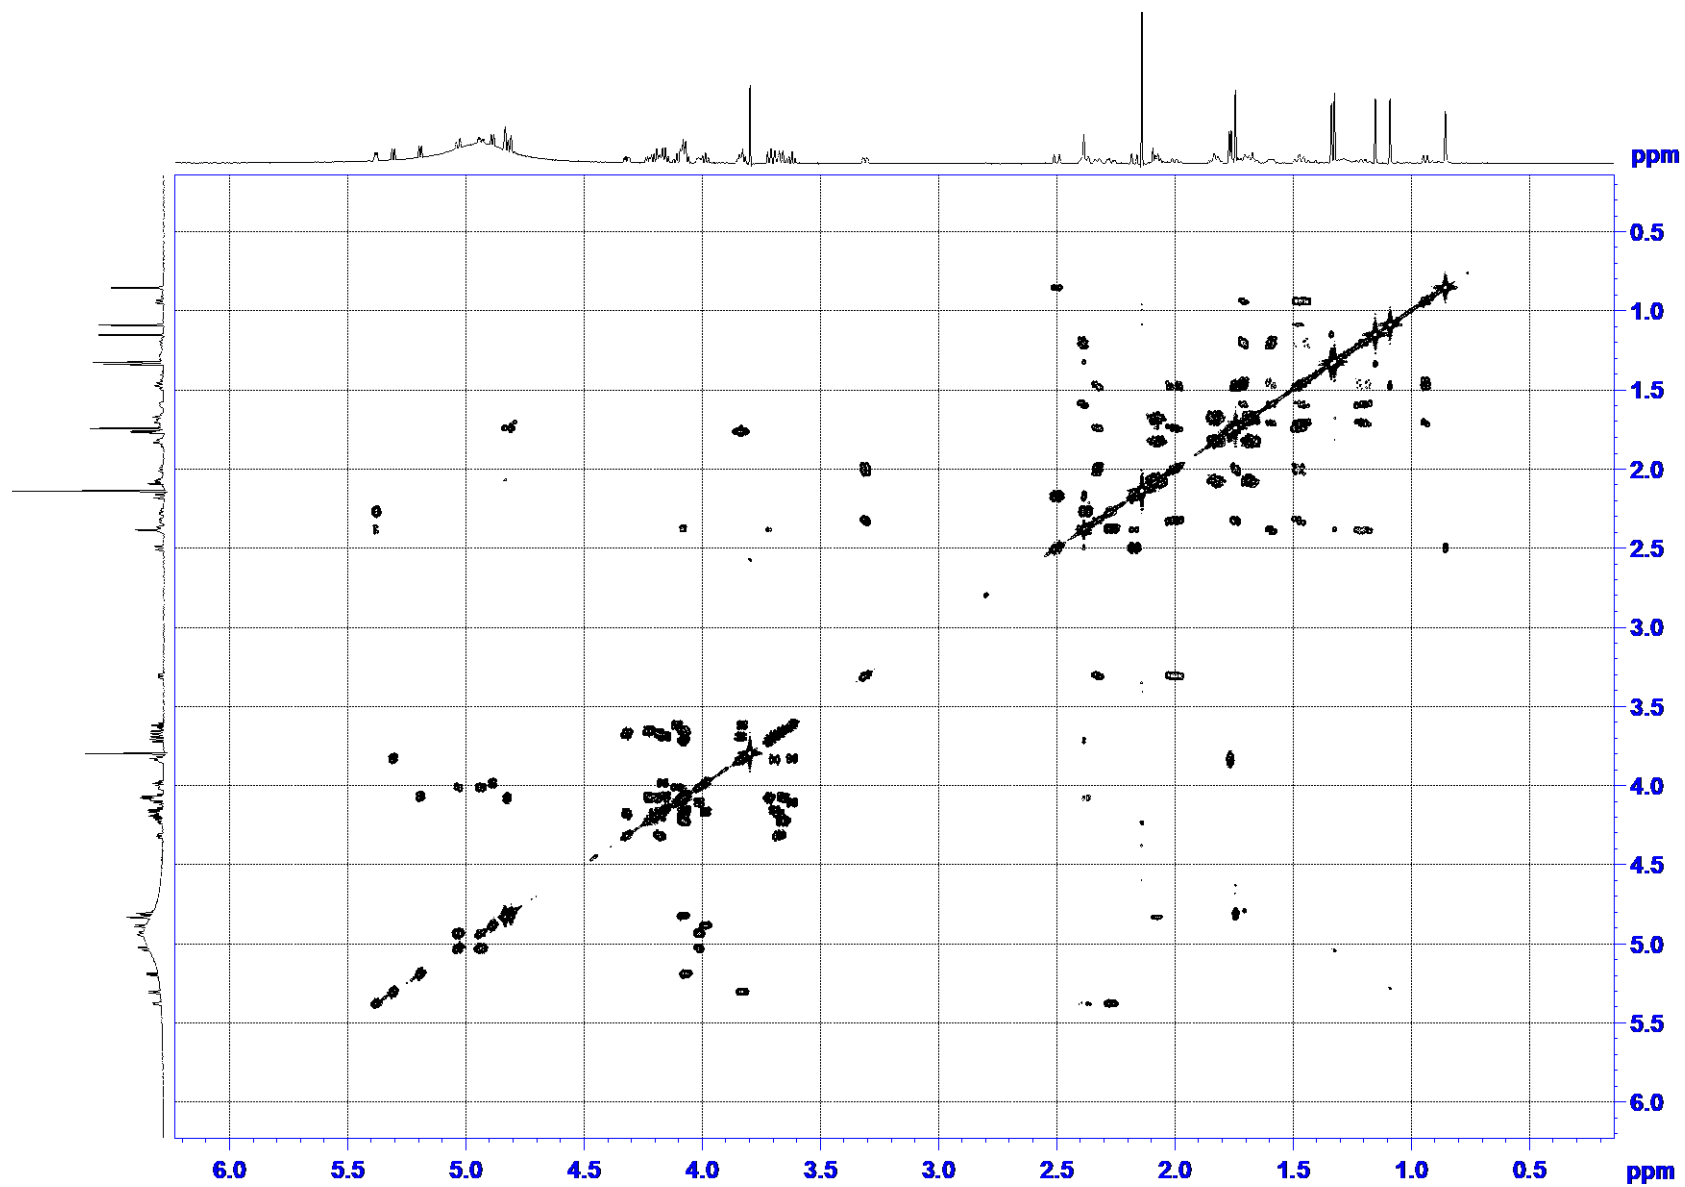

Figure S3. The COSY (700.00 MHz) spectrum of chitonoidoside A (**1**) in C<sub>5</sub>D<sub>5</sub>N/D<sub>2</sub>O (4/1)

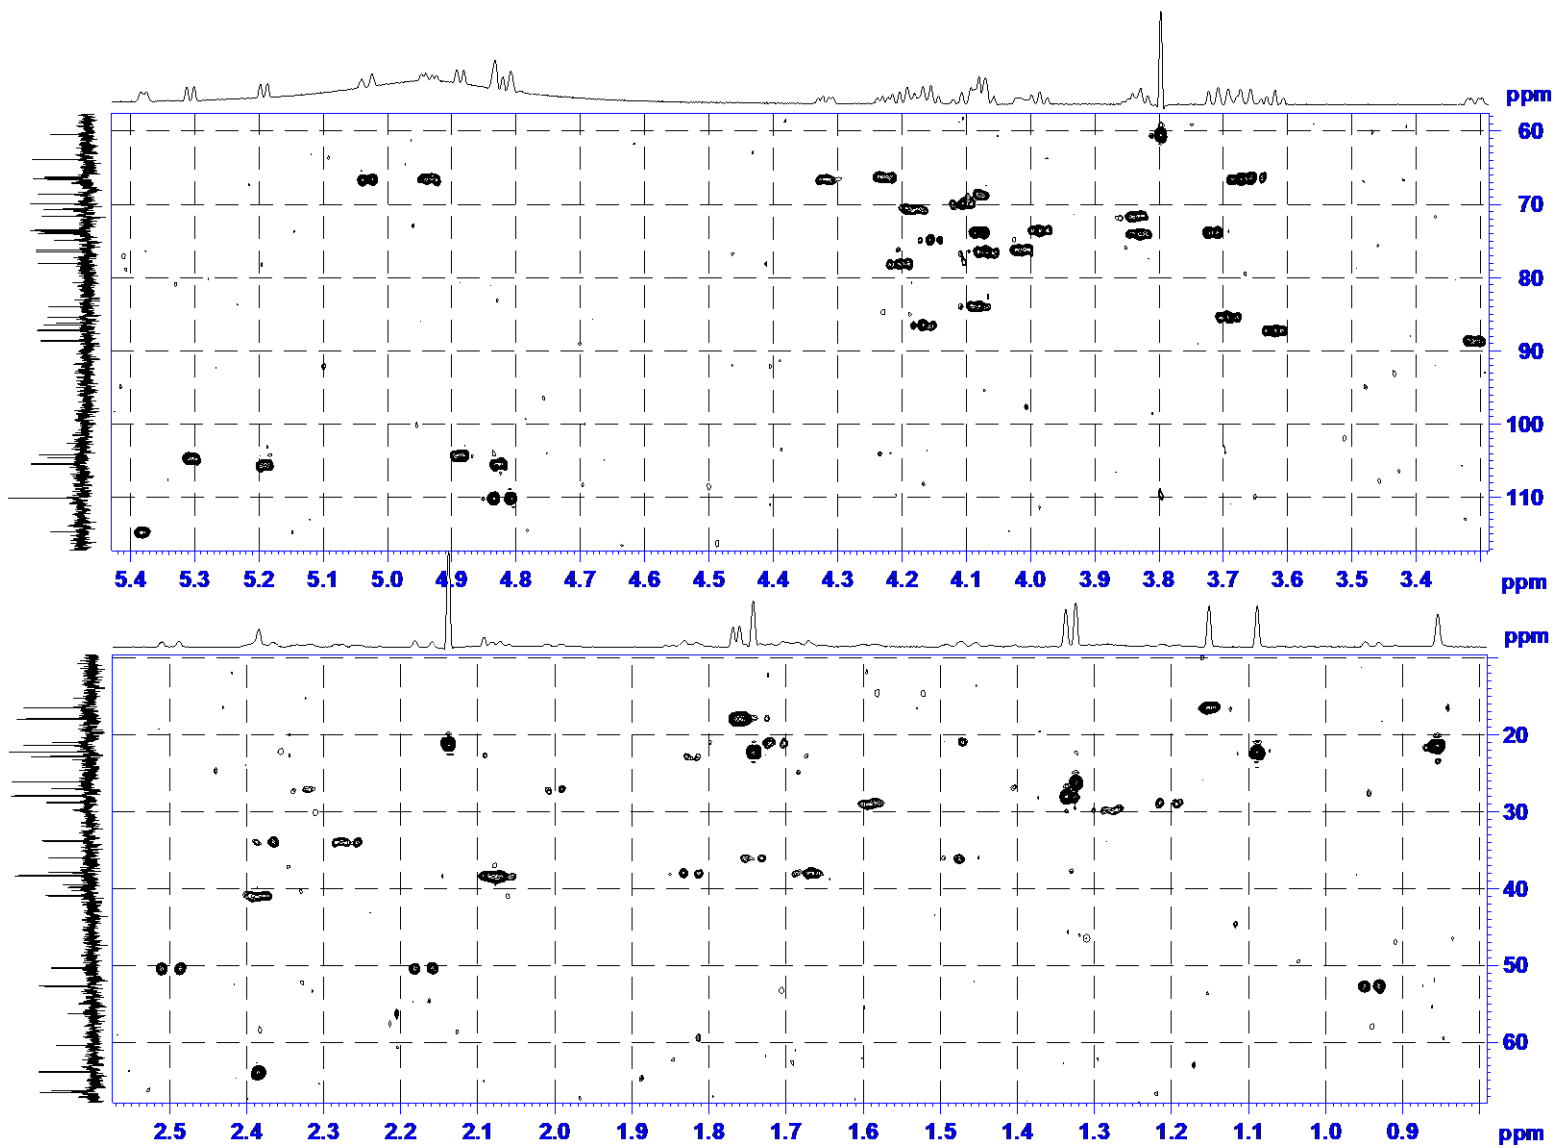

Figure S4. The HSQC (700.00 MHz) spectrum of chitonoidoside A (1) in  $C_5D_5N/D_2O$  (4/1)

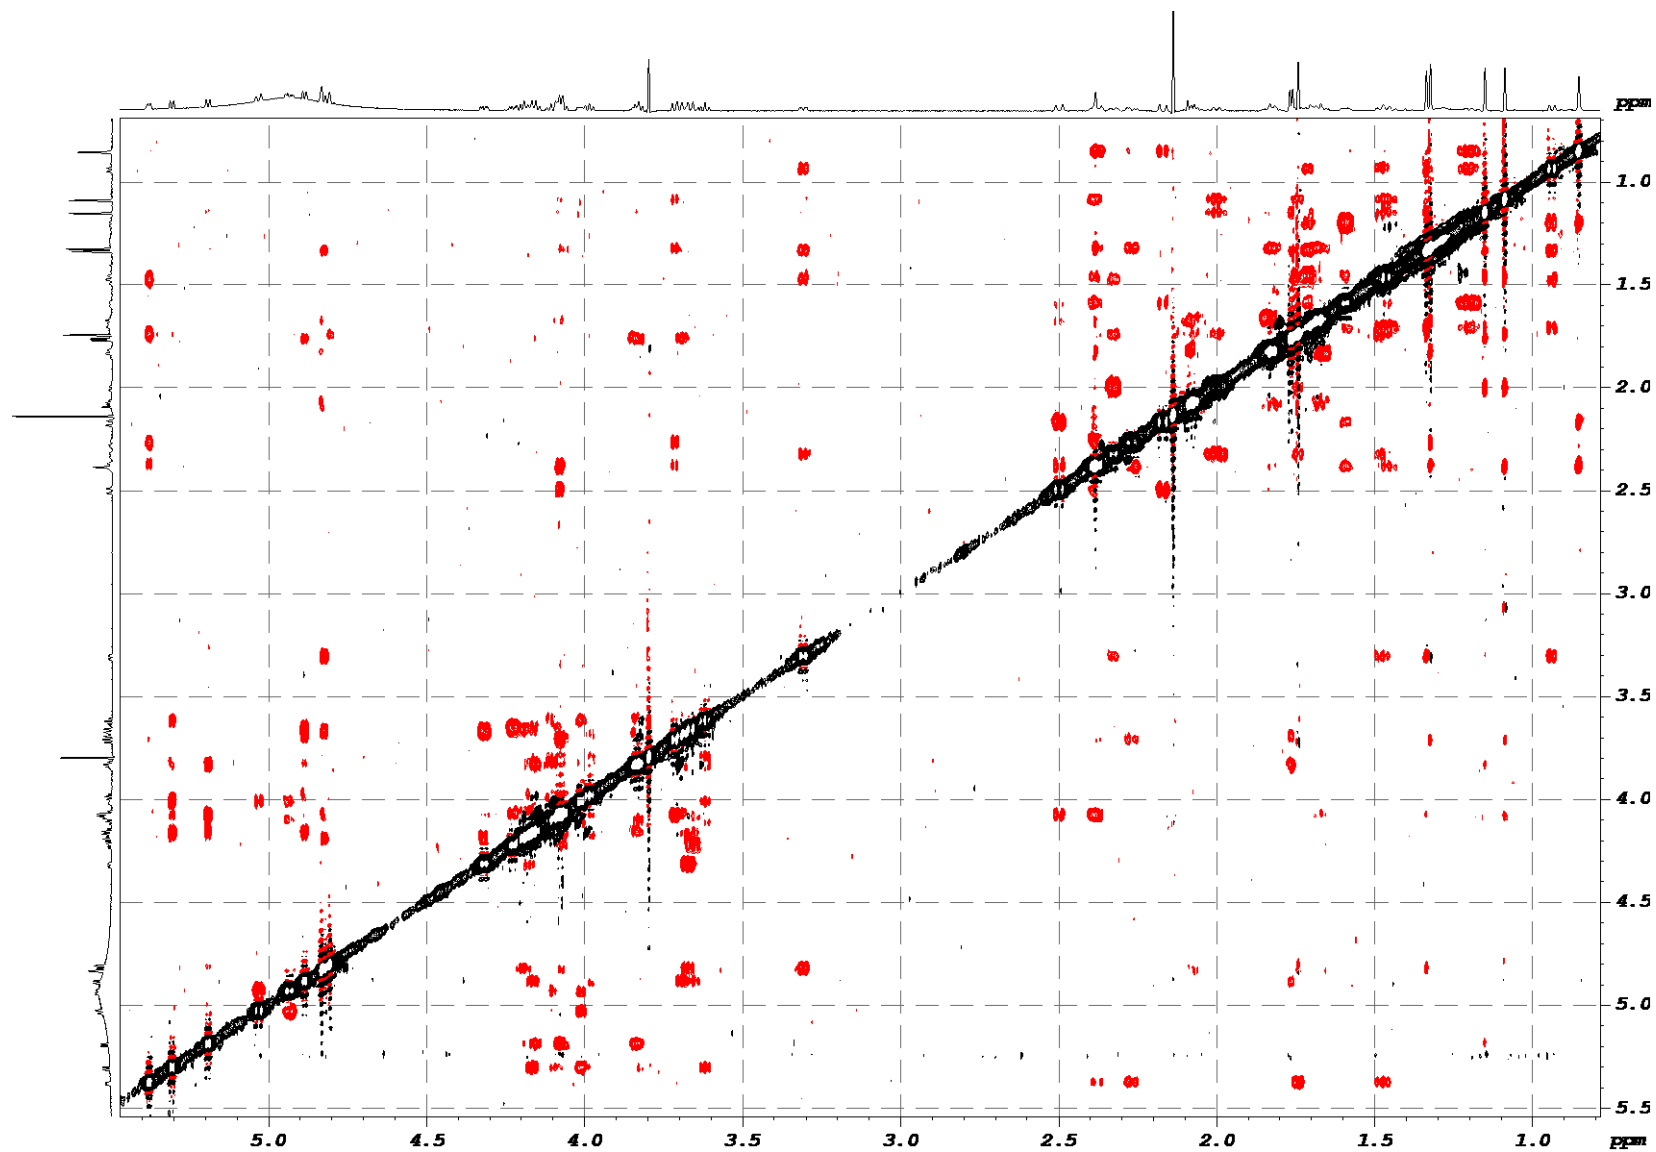

Figure S5. The ROESY (700.00 MHz) spectrum of chitonoidoside A (**1**) in C<sub>5</sub>D<sub>5</sub>N/D<sub>2</sub>O (4/1)



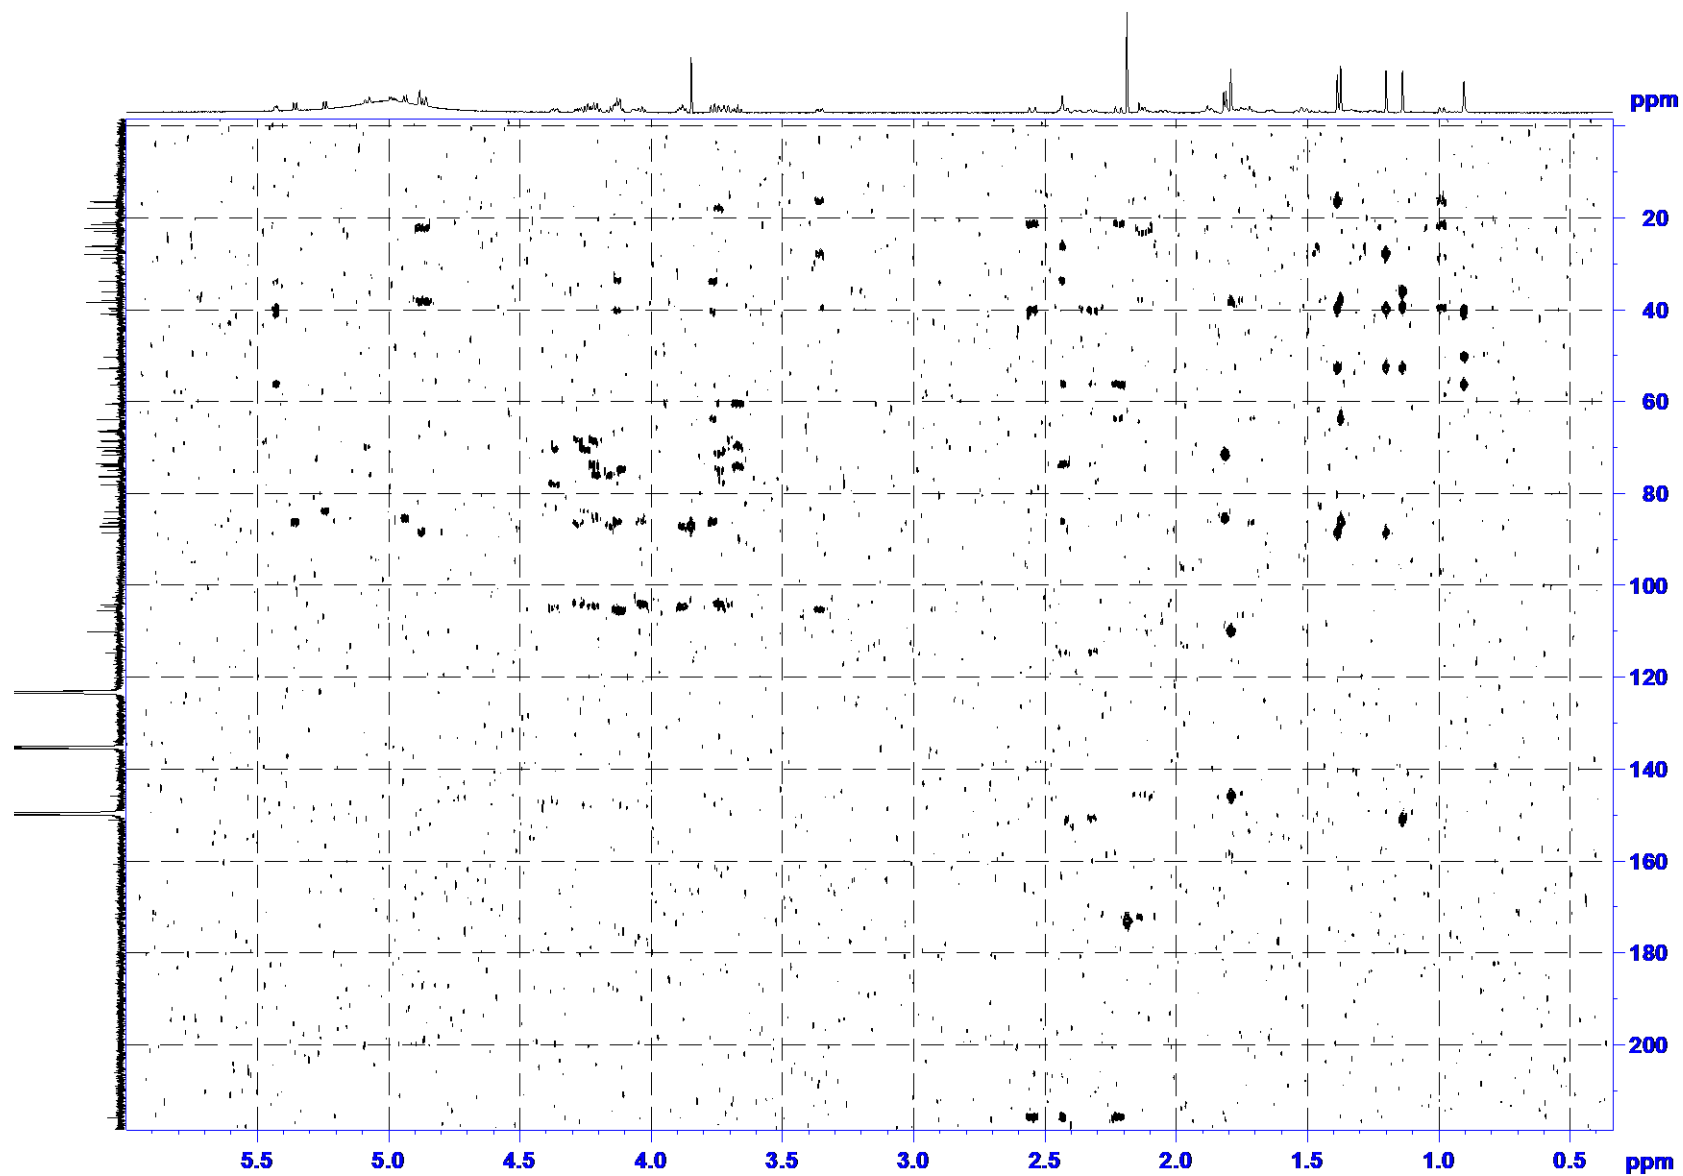

Figure S6. The HMBC (700.00 MHz) spectrum of chitonoidoside A (**1**) in C<sub>5</sub>D<sub>5</sub>N/D<sub>2</sub>O (4/1)

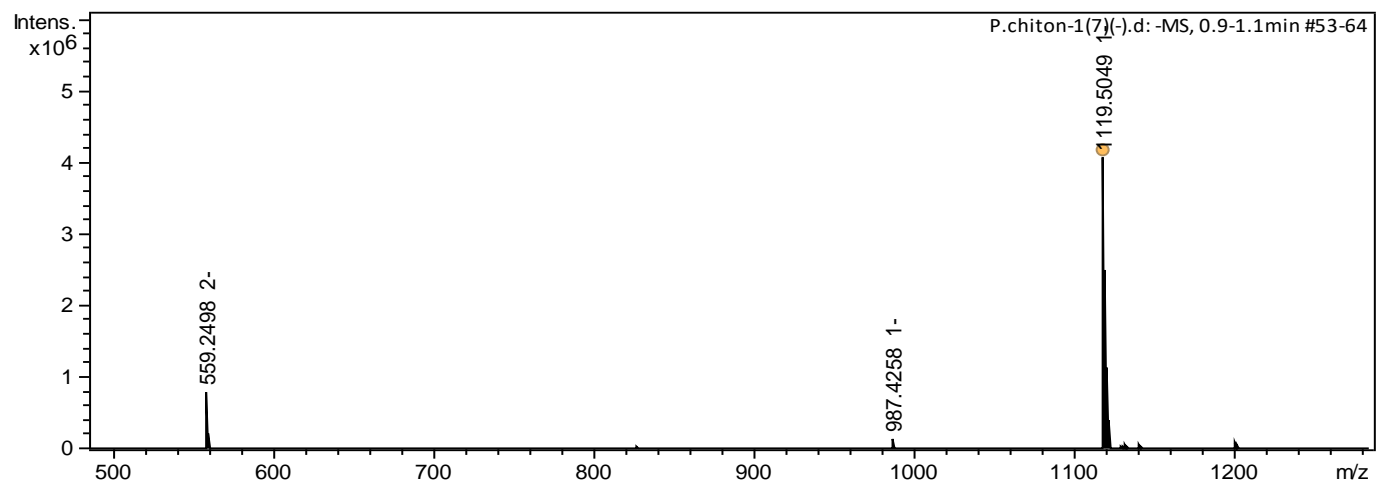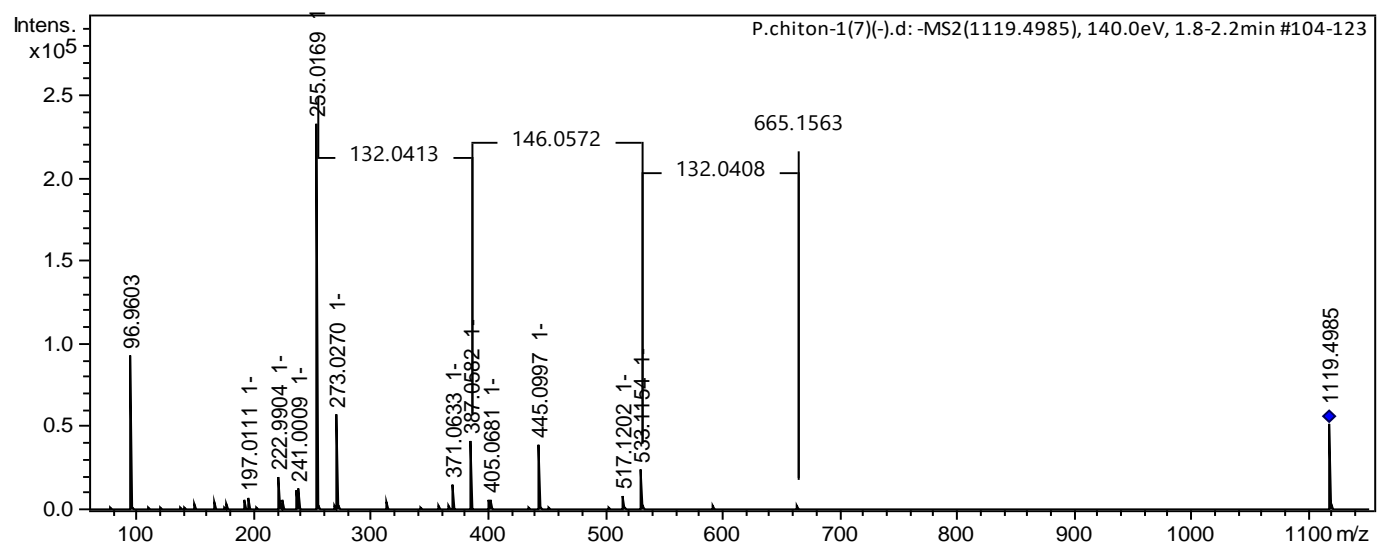

Figure S7. HR-ESI-MS (–) and ESI-MS/MS (–) spectra of chitonoidoside A (**1**)

**Table S1.** <sup>13</sup>C and <sup>1</sup>H NMR chemical shifts, HMBC and ROESY correlations of carbohydrate moiety of chitonoidoside A<sub>1</sub> (2).

| Atom             | $\delta_{\text{C}}$ mult. <sup>a, b, c</sup> | $\delta_{\text{H}}$ mult. (J in Hz) <sup>d</sup> | HMBC                    | ROESY                   |
|------------------|----------------------------------------------|--------------------------------------------------|-------------------------|-------------------------|
| Xyl1 (1→C-3)     |                                              |                                                  |                         |                         |
| 1                | 105.8 CH                                     | 4.71 d (7.6)                                     | C: 3                    | H-3; H-3, 5 Xyl1        |
| 2                | <b>83.7</b> CH                               | 3.95 t (7.6)                                     | C: 1 Qui2, 1, 3 Xyl1    | H-1 Qui2                |
| 3                | 77.9 CH                                      | 4.15 t (8.9)                                     | C: 2, 4 Xyl1            | H-1 Xyl1                |
| 4                | 70.9 CH                                      | 4.10 m                                           | C: 3, 5 Xyl1            |                         |
| 5                | 66.7 CH <sub>2</sub>                         | 4.25 dd (5.0; 11.0)                              | C: 1, 3, 4, Xyl1        |                         |
|                  |                                              | 3.63 t (9.9; 11.0)                               | C: 1, 3 Xyl1            | H-1 Xyl1                |
| Qui2 (1→2Xyl1)   |                                              |                                                  |                         |                         |
| 1                | 105.5 CH                                     | 5.03 d (7.3)                                     | C: 2 Xyl1               | H-2 Xyl1; H-3, 5 Qui2   |
| 2                | 76.6 CH                                      | 3.91 t (8.8)                                     | C: 1, 3 Qui2            |                         |
| 3                | 75.7 CH                                      | 3.96 t (8.8)                                     | C: 2, 4 Qui2            | H-5 Qui2                |
| 4                | <b>86.4</b> CH                               | 3.51 t (8.8)                                     | C: 3, 5, 6 Qui2, 1 Xyl3 | H-1 Xyl3, H-6 Qui2      |
| 5                | 72.2 CH                                      | 3.67 dd (5.9; 8.8)                               | C: 4 Qui2               | H-1, 3 Qui2             |
| 6                | 18.5 CH <sub>3</sub>                         | 1.63 d (5.9)                                     | C: 4, 5 Qui2            |                         |
| Xyl3 (1→4Qui2)   |                                              |                                                  |                         |                         |
| 1                | 105.1 CH                                     | 4.78 d (7.3)                                     | C: 4 Qui2               | H-4 Qui2; H-3, 5 Xyl3   |
| 2                | 73.9 CH                                      | 3.85 t (9.1)                                     | C: 1, 3 Xyl3            |                         |
| 3                | <b>87.8</b> CH                               | 4.06 t (9.1)                                     | C: 2, 4 Xyl3; 1 MeGlc4  | H-1 MeGlc4; H-1 Xyl3    |
| 4                | 69.5 CH                                      | 3.91 m                                           | C: 1, 3, 5 Xyl3         |                         |
| 5                | 66.5 CH <sub>2</sub>                         | 4.12 dd (6.4; 11.9)                              | C: 3, 4 Xyl3            |                         |
|                  |                                              | 3.60 t (11.0)                                    | C: 1, 3, 4 Xyl3         | H-1 Xyl3                |
| MeGlc4 (1→3Xyl3) |                                              |                                                  |                         |                         |
| 1                | 105.3 CH                                     | 5.12 d (7.6)                                     | C: 3 Xyl3               | H-3 Xyl3; H-3, 5 MeGlc4 |
| 2                | 75.0 CH                                      | 3.80 t (7.6)                                     | C: 1, 3 MeGlc4          |                         |
| 3                | 87.2 CH                                      | 3.64 t (7.6)                                     | C: 2, 4 MeGlc4, OMe     | H-1, 5 MeGlc4; OMe      |
| 4                | 70.7 CH                                      | 3.96 t (8.7)                                     | C: 3, 5, 6 MeGlc4       |                         |
| 5                | 76.3 CH                                      | 4.04 t (7.6)                                     | C: 4 MeGlc4             | H-1, 3 MeGlc4           |
| 6                | 67.8 CH <sub>2</sub>                         | 4.97 d (10.9)                                    | C: 4, 5 MeGlc4          |                         |
|                  |                                              | 4.72 dd (5.6; 11.5)                              | C: 5 MeGlc4             |                         |
| OMe              | 61.2 CH <sub>3</sub>                         | 3.76 s                                           | C: 3 MeGlc4             |                         |

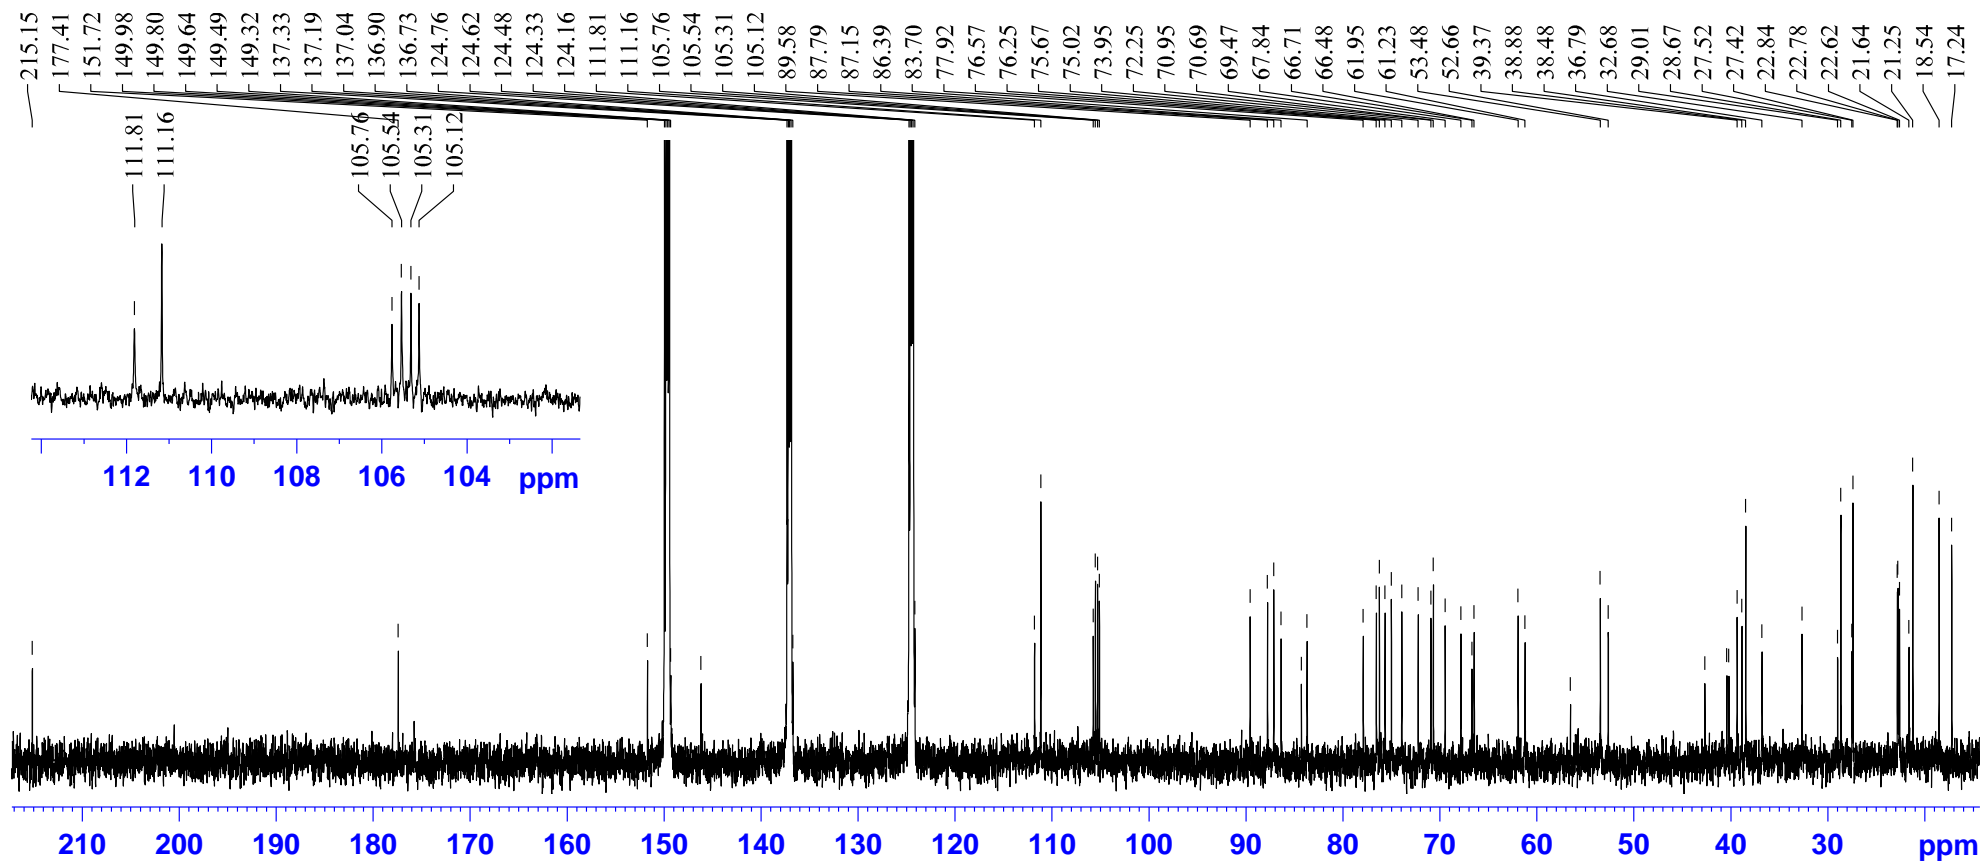

Figure S8. The  $^{13}\text{C}$  NMR (176.03 MHz) spectrum of chitonoidoside A<sub>1</sub> (2) in  $\text{C}_5\text{D}_5\text{N}/\text{D}_2\text{O}$  (4/1)

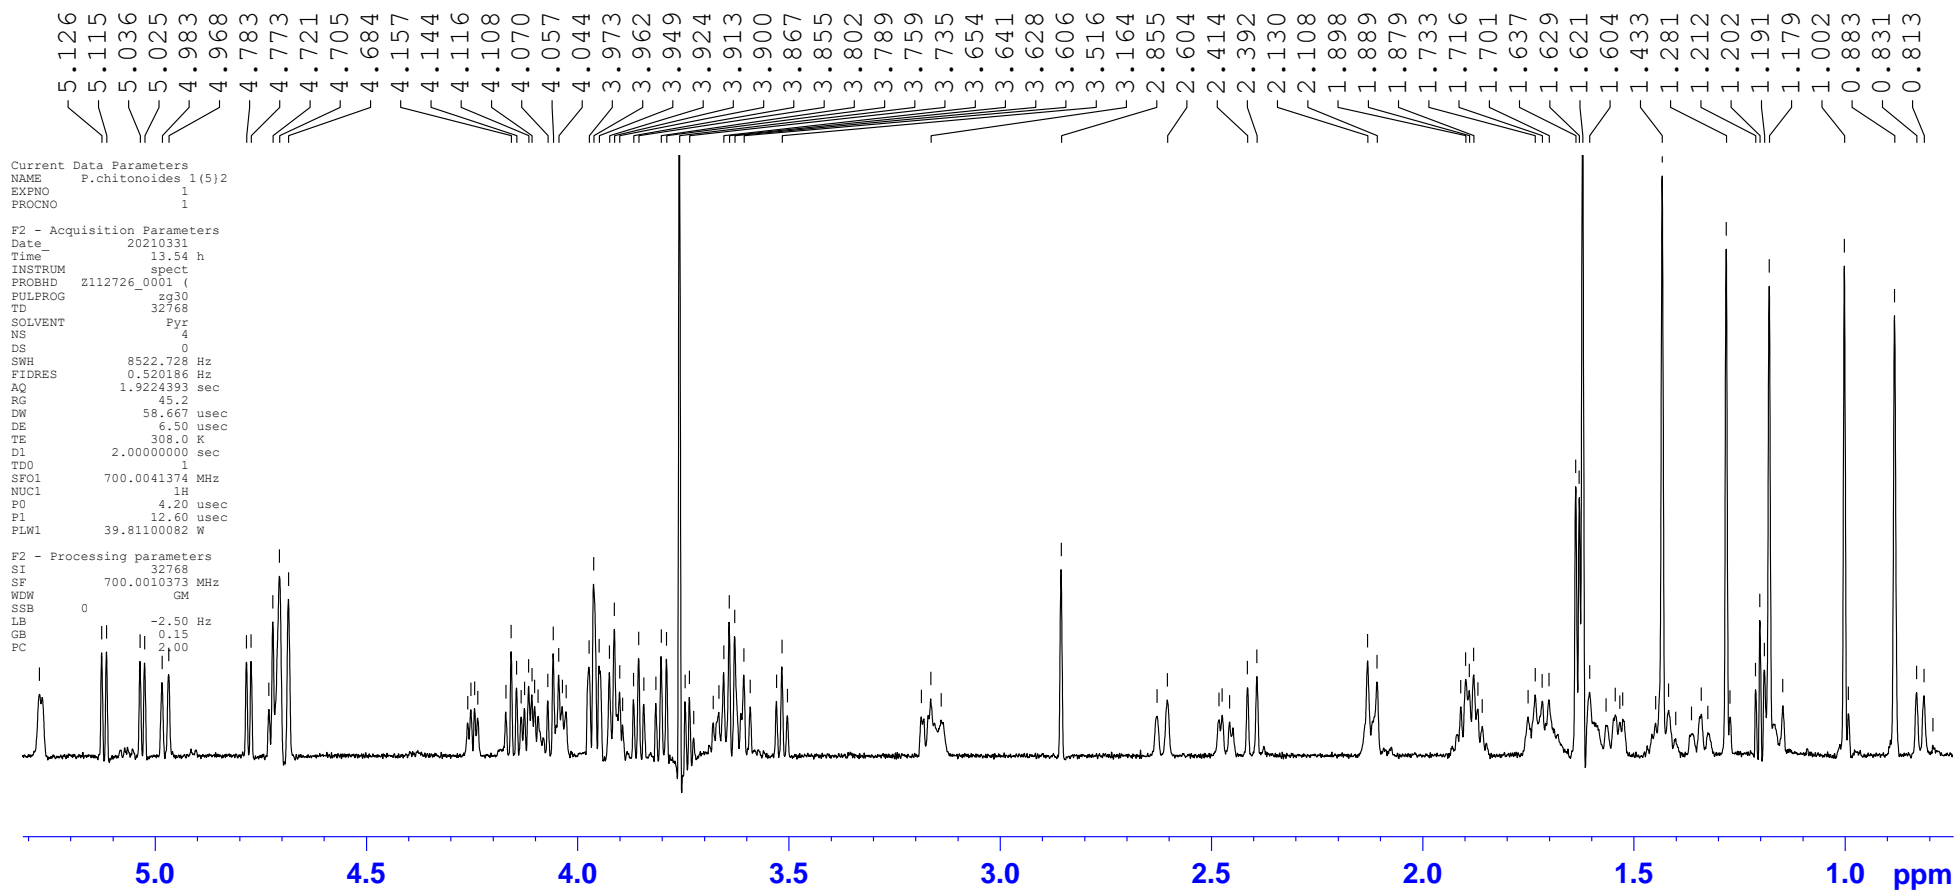

Figure S9. The  $^1\text{H}$  NMR (700.00 MHz) spectrum of chitonoidoside A<sub>1</sub> (**2**) in  $\text{C}_5\text{D}_5\text{N}/\text{D}_2\text{O}$  (4/1)

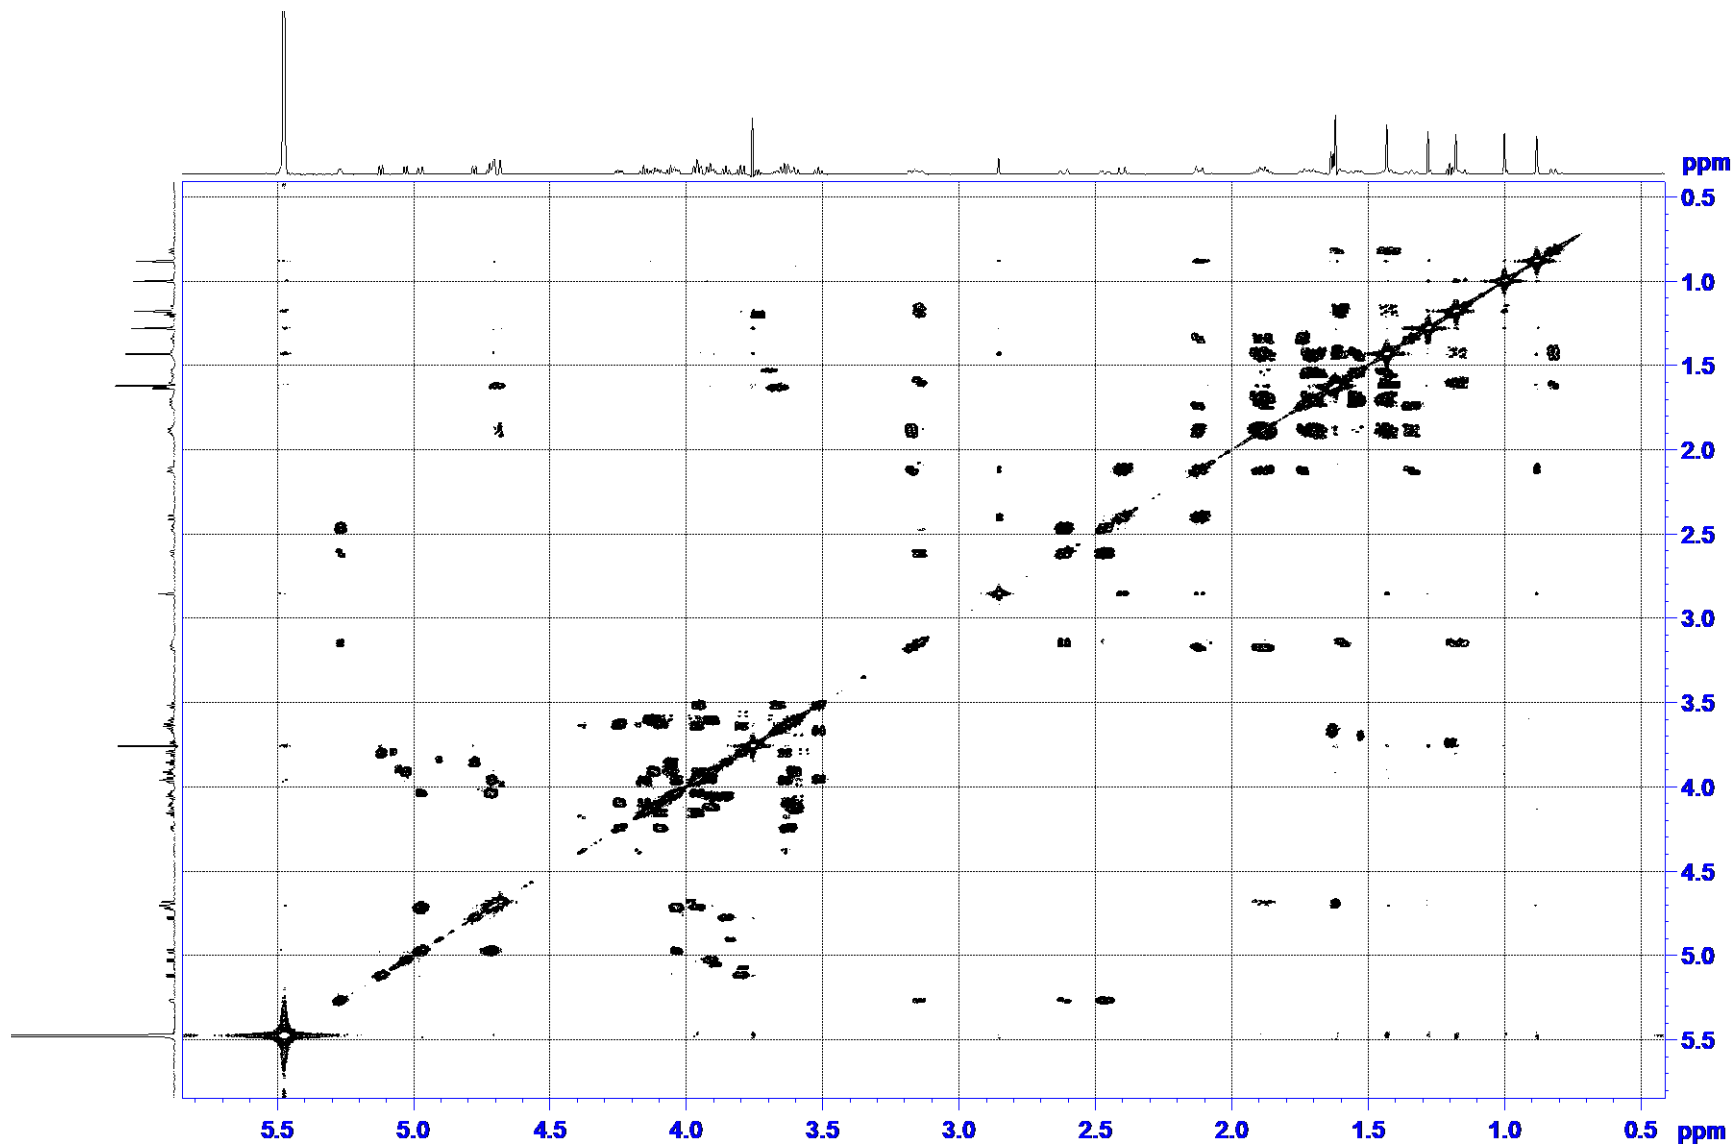

Figure S10. The COSY (700.00 MHz) spectrum of chitonoidoside A<sub>1</sub> (2) in C<sub>5</sub>D<sub>5</sub>N/D<sub>2</sub>O (4/1)

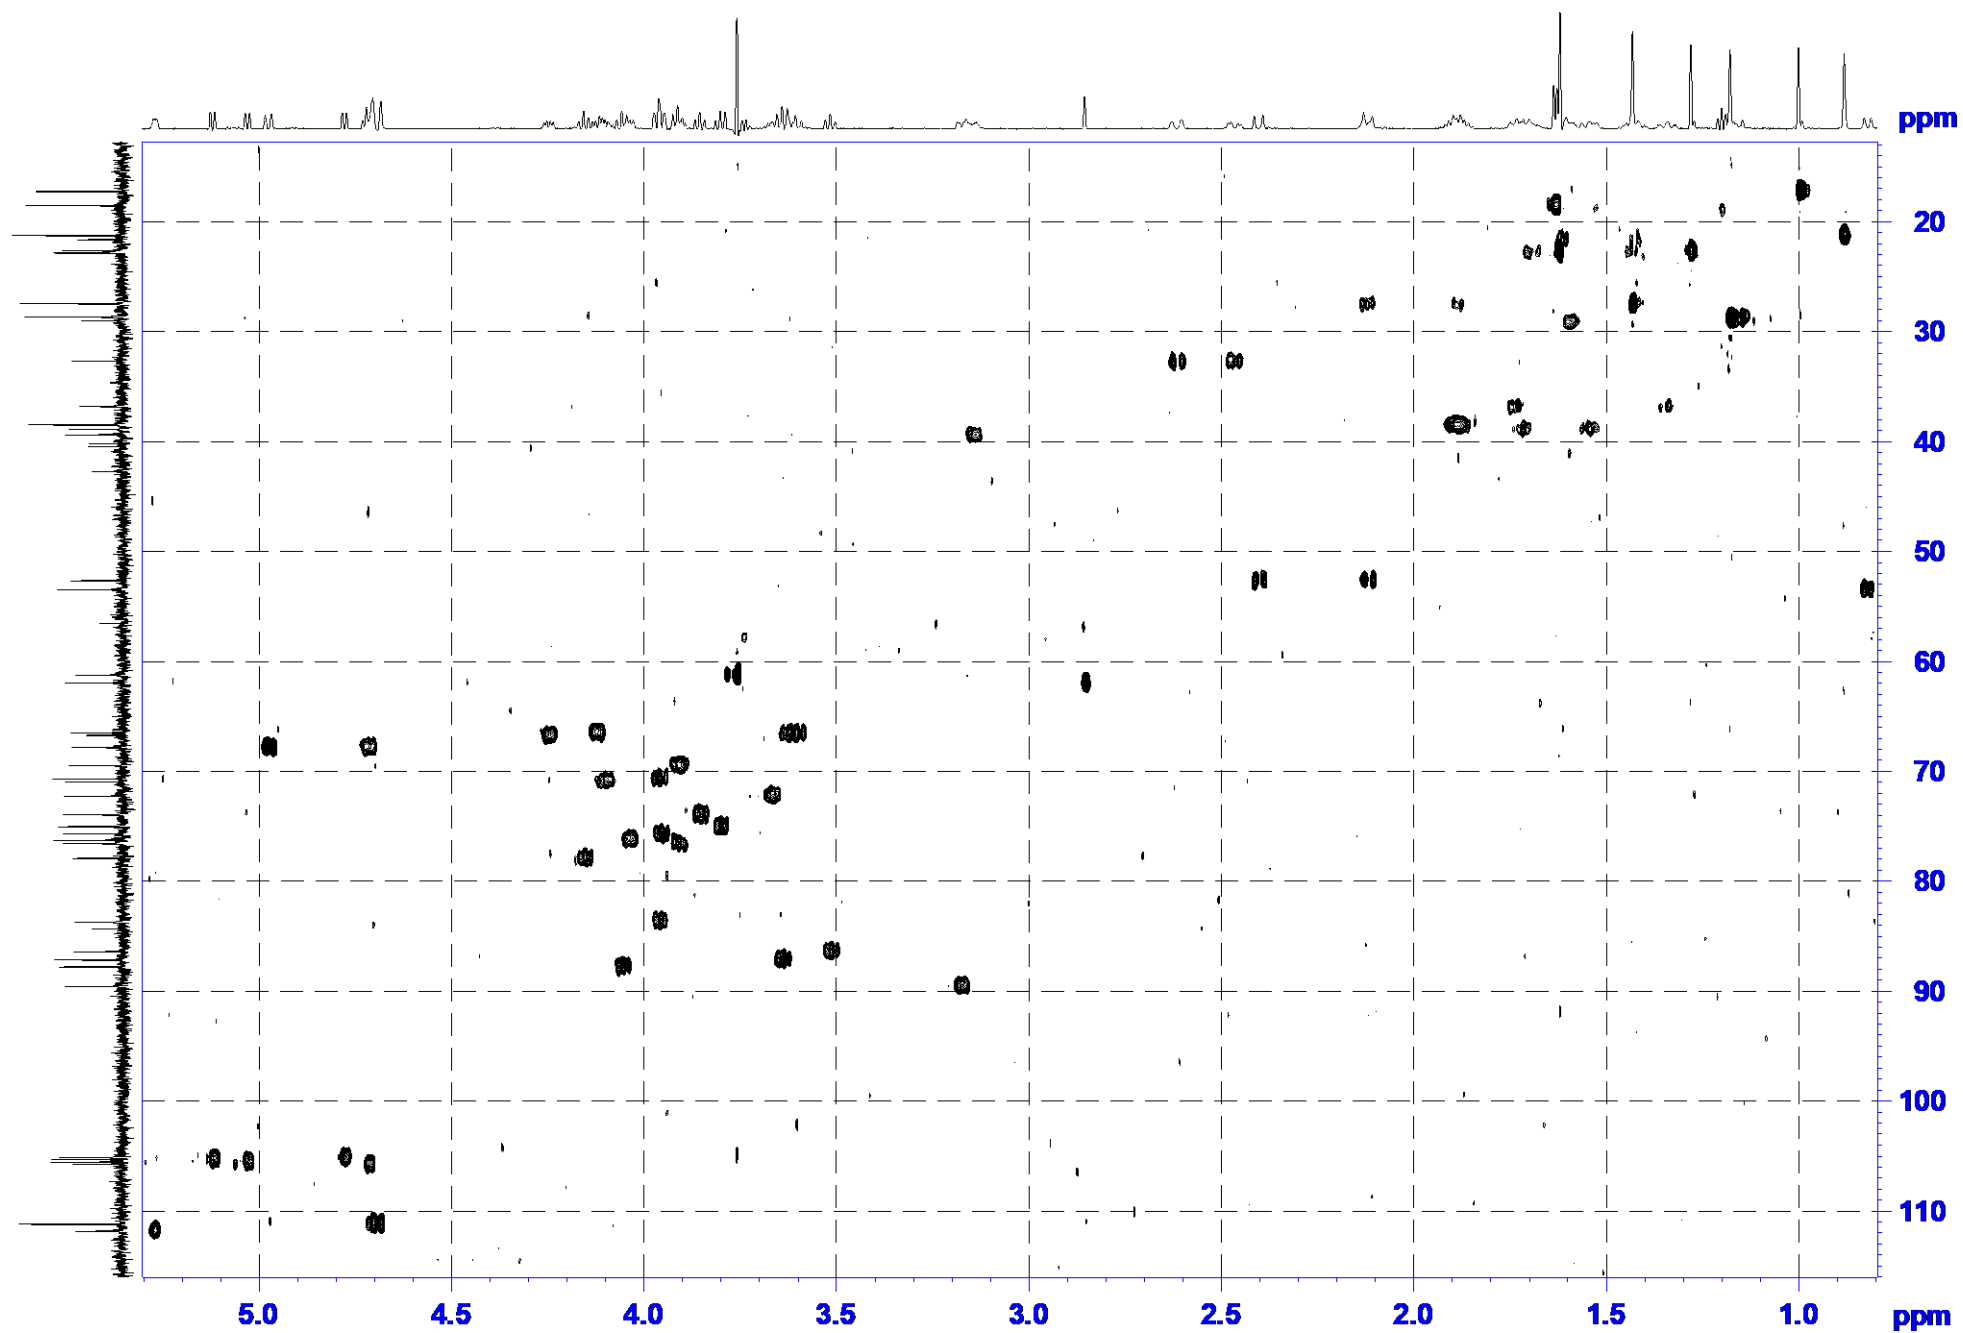

Figure S11. The HSQC (700.00 MHz) spectrum of chitonoidoside A<sub>1</sub> (**2**) in C<sub>5</sub>D<sub>5</sub>N/D<sub>2</sub>O (4/1)

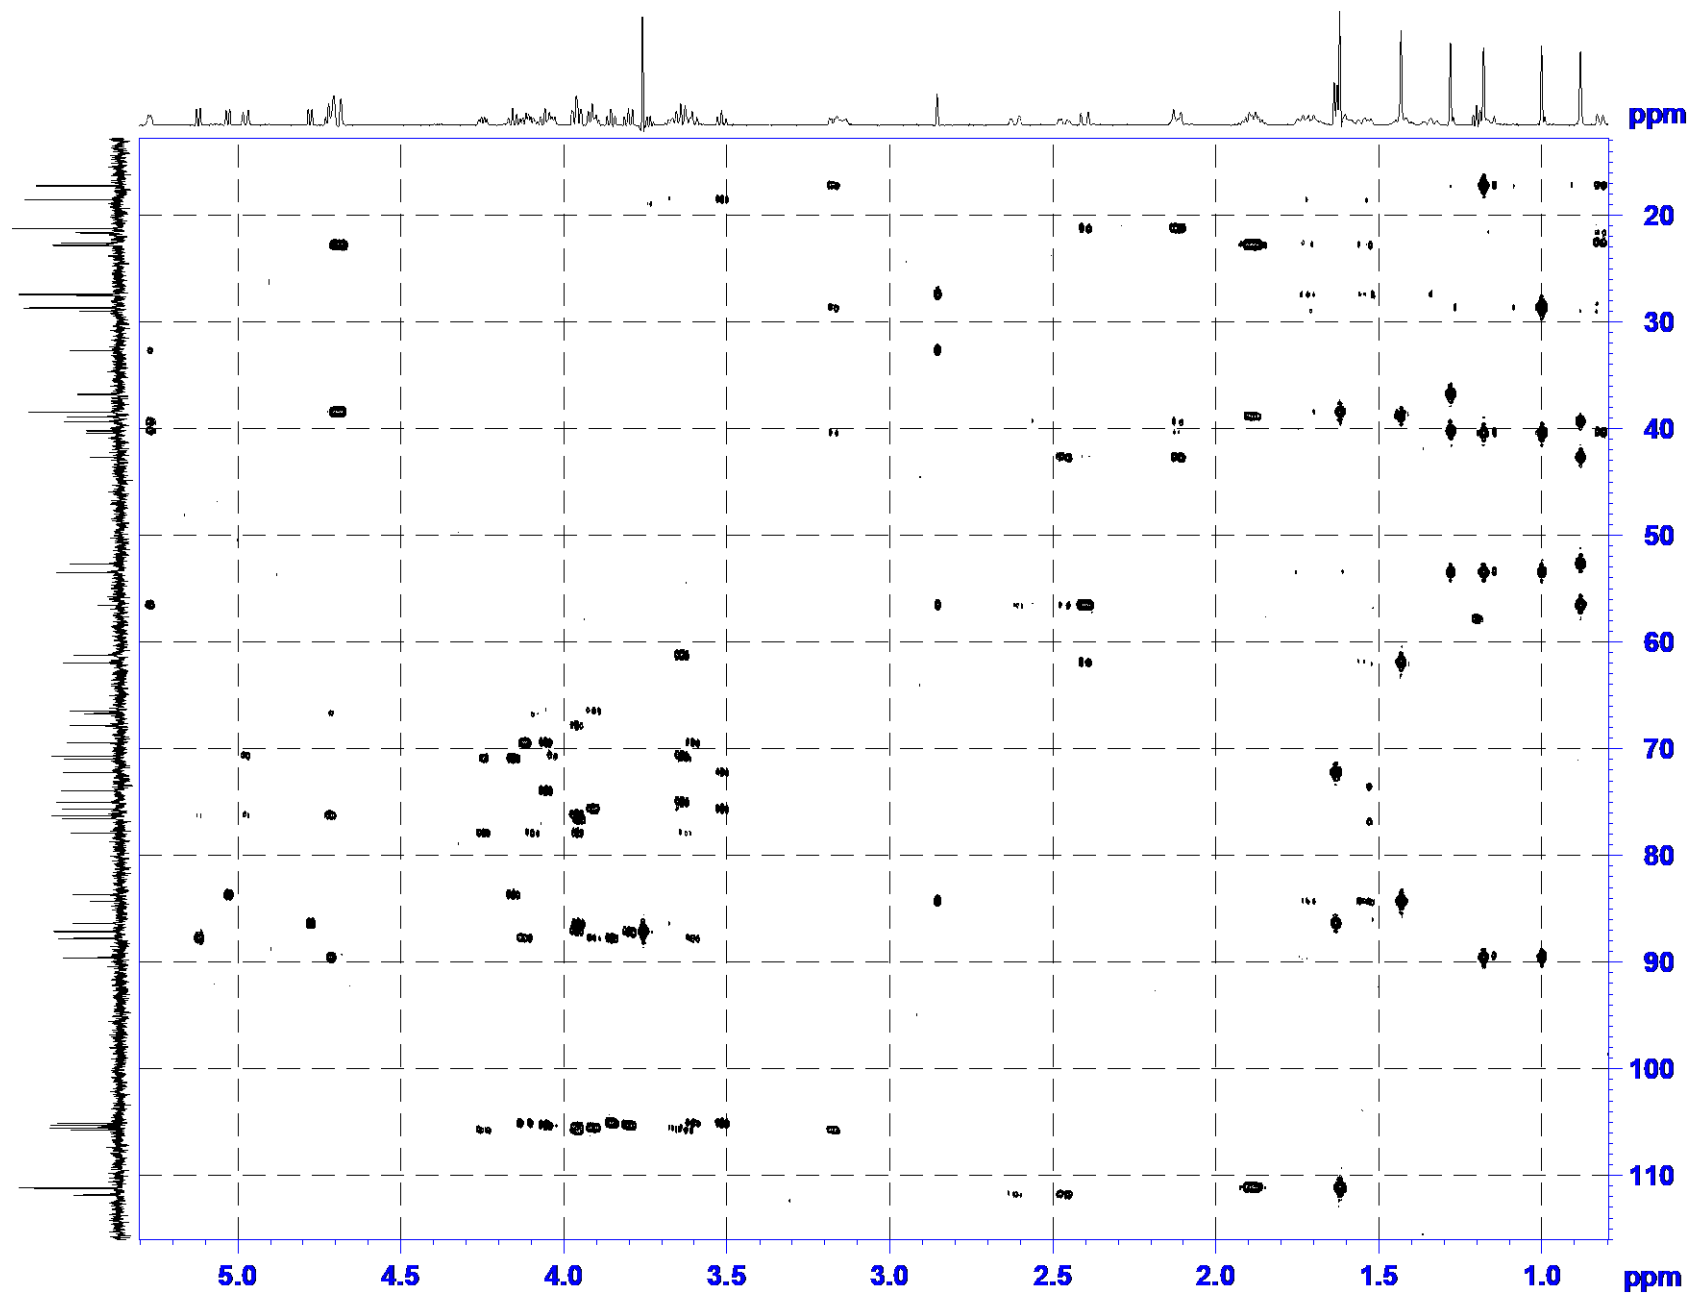

Figure S12. The HMBC (700.00 MHz) spectrum of chitonoidoside A<sub>1</sub> (**2**) in C<sub>5</sub>D<sub>5</sub>N/D<sub>2</sub>O (4/1)



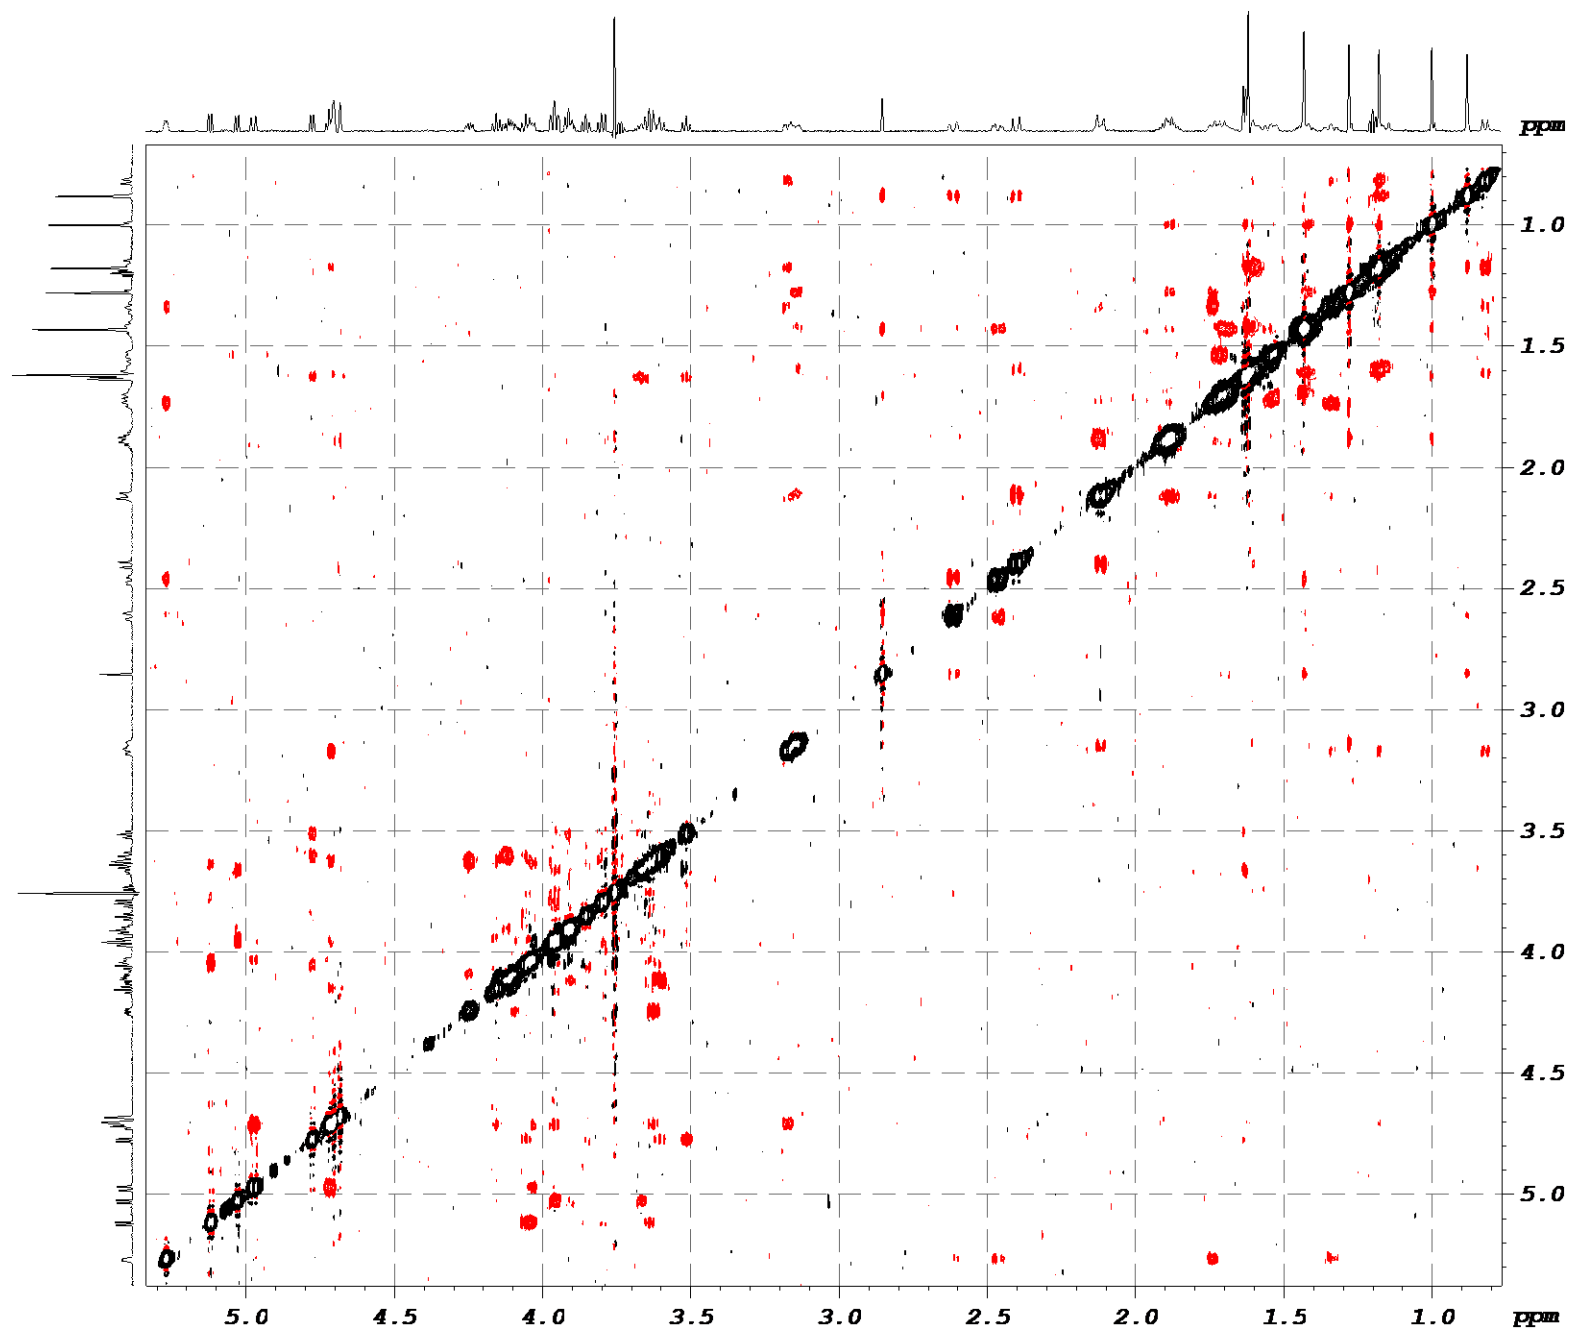

Figure S13. The ROESY (700.00 MHz) spectrum of chitonoidoside A<sub>1</sub> (**2**) in C<sub>5</sub>D<sub>5</sub>N/D<sub>2</sub>O (4/1)

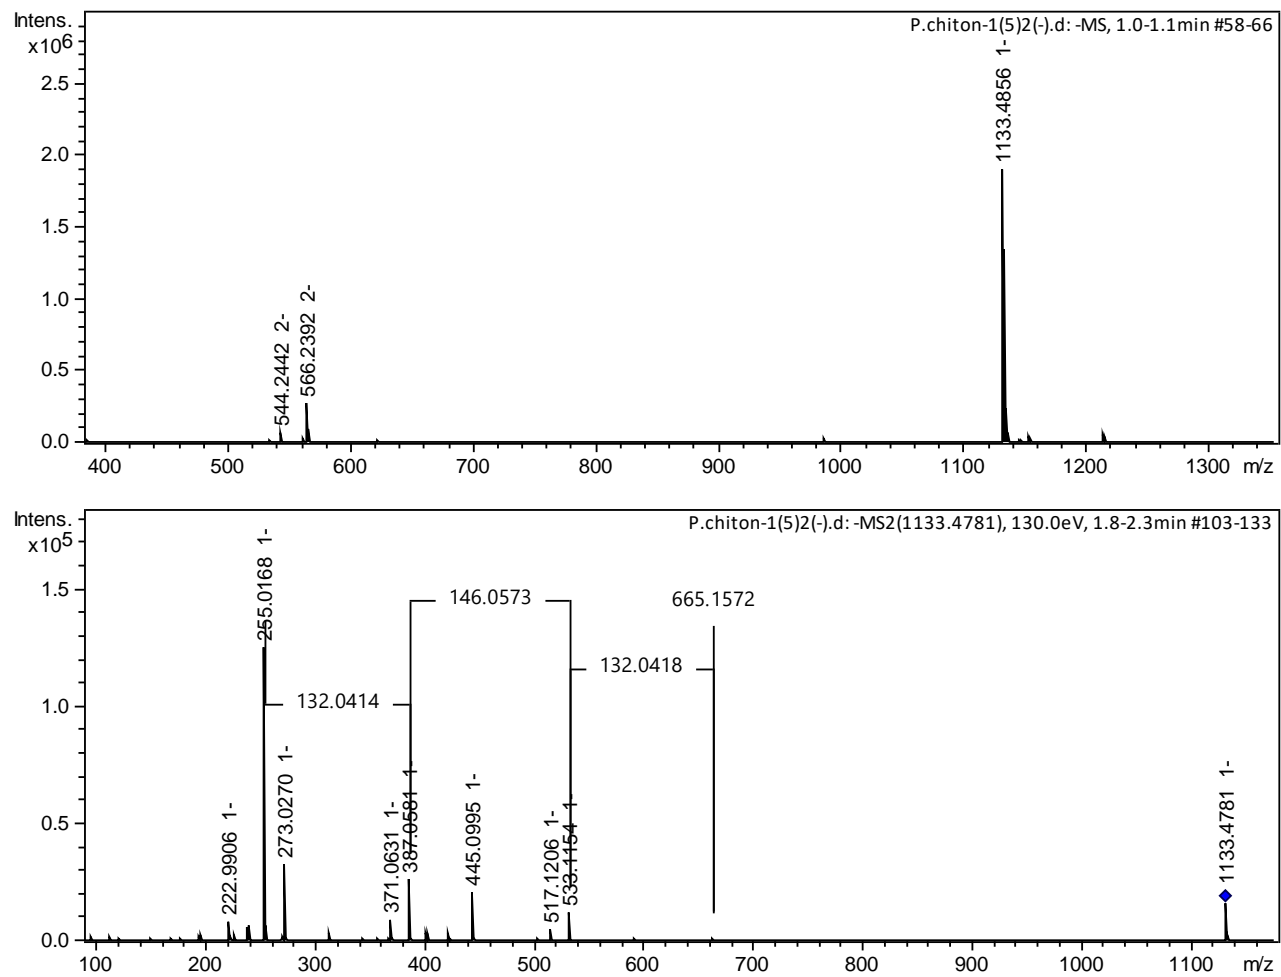

Figure S14. HR-ESI-MS and ESI-MS/MS spectra of chitonoidoside A<sub>1</sub> (2)

**Table S2.** <sup>13</sup>C and <sup>1</sup>H NMR chemical shifts, HMBC and ROESY correlations of the aglycone moiety of chitonoidoside B (3).

| Position | $\delta_C$ mult. <sup>a</sup> | $\delta_H$ mult. (J in Hz) <sup>b</sup> | HMBC                       | ROESY                         |
|----------|-------------------------------|-----------------------------------------|----------------------------|-------------------------------|
| 1        | 35.9 CH <sub>2</sub>          | 1.61 m<br>1.30 m                        |                            | H-19<br>H-3, H-11             |
| 2        | 26.7 CH <sub>2</sub>          | 2.09 m                                  |                            |                               |
| 3        | 88.7 CH                       | 3.12 dd (3.5; 11.7)                     |                            | H-5, H-31, H1-Xyl1            |
| 4        | 39.6 C                        |                                         |                            |                               |
| 5        | 52.7 CH                       | 0.76 brd (12.4)                         | C: 6, 10, 30               | H-1, H-3, H-7, H-31           |
| 6        | 20.9 CH <sub>2</sub>          | 1.59 m                                  |                            | H-31                          |
| 7        | 28.7 CH <sub>2</sub>          | 1.58 m<br>1.11 m                        |                            | H-5, H-32                     |
| 8        | 40.9 CH                       | 2.33 m                                  | C: 9                       | H-18, H-19                    |
| 9        | 150.9 C                       |                                         |                            |                               |
| 10       | 39.4 C                        |                                         |                            |                               |
| 11       | 114.7 CH                      | 5.30 d (5.7)                            | C: 8                       | H-1                           |
| 12       | 33.8 CH <sub>2</sub>          | 2.38 m<br>2.26 dd (6.4; 16.4)           | C: 13, 18<br>C: 11         | H-32<br>H-18, H-21            |
| 13       | 56.3 C                        |                                         |                            |                               |
| 14       | 40.3 C                        |                                         |                            |                               |
| 15       | 50.4 CH <sub>2</sub>          | 2.47 d (15.7)<br>2.18 d (15.7)          | C: 14, 16, 32<br>C: 13, 16 | H-18<br>H-7, H-32             |
| 16       | 218.0 C                       |                                         |                            |                               |
| 17       | 63.8 CH                       | 2.36 s                                  | C: 16, 18, 20, 21          | H-21, H-22, H-32              |
| 18       | 73.8 CH <sub>2</sub>          | 4.03 d (10.0)<br>3.65 d (10.0)          | C: 20<br>C: 12, 20         | H-8, H-15<br>H-12, H-19, H-21 |
| 19       | 22.7 CH <sub>3</sub>          | 1.00 s                                  | C: 1, 5, 9, 10             | H-1, H-2, H-6, H-8, H-18      |
| 20       | 86.7 C                        |                                         |                            |                               |
| 21       | 26.1 CH <sub>3</sub>          | 1.32 s                                  | C: 17, 20, 22              | H-12, H-17, H-18, H-22        |
| 22       | 37.8 CH <sub>2</sub>          | 1.70 m<br>1.58 m                        |                            | H-21<br>H-21                  |
| 23       | 22.1 CH <sub>2</sub>          | 1.71 m<br>1.57 m                        |                            |                               |
| 24       | 38.2 CH <sub>2</sub>          | 1.95 m                                  |                            |                               |
| 25       | 145.9 C                       |                                         |                            |                               |
| 26       | 110.1 CH <sub>2</sub>         | 4.72 brs<br>4.71 brs                    | C: 24, 27<br>C: 24, 27     | H-21, H-24                    |
| 27       | 22.2 CH <sub>3</sub>          | 1.66 s                                  | C: 24, 25, 26              | H-26                          |
| 30       | 16.4 CH <sub>3</sub>          | 0.99 s                                  | C: 3, 4, 5, 31             | H-2, H-6, H-31                |
| 31       | 27.9 CH <sub>3</sub>          | 1.14 s                                  | C: 3, 4, 5, 30             | H-3, H-5, H-6, H-30, H-1 Xyl1 |
| 32       | 21.4 CH <sub>3</sub>          | 0.79 s                                  | C: 13, 14, 15              | H-7, H-15, H-17               |

<sup>a</sup>Recorded at 176.03 MHz in C<sub>5</sub>D<sub>5</sub>N/D<sub>2</sub>O (4/1). <sup>b</sup>Recorded at 700.00 MHz in C<sub>5</sub>D<sub>5</sub>N/D<sub>2</sub>O (4/1).

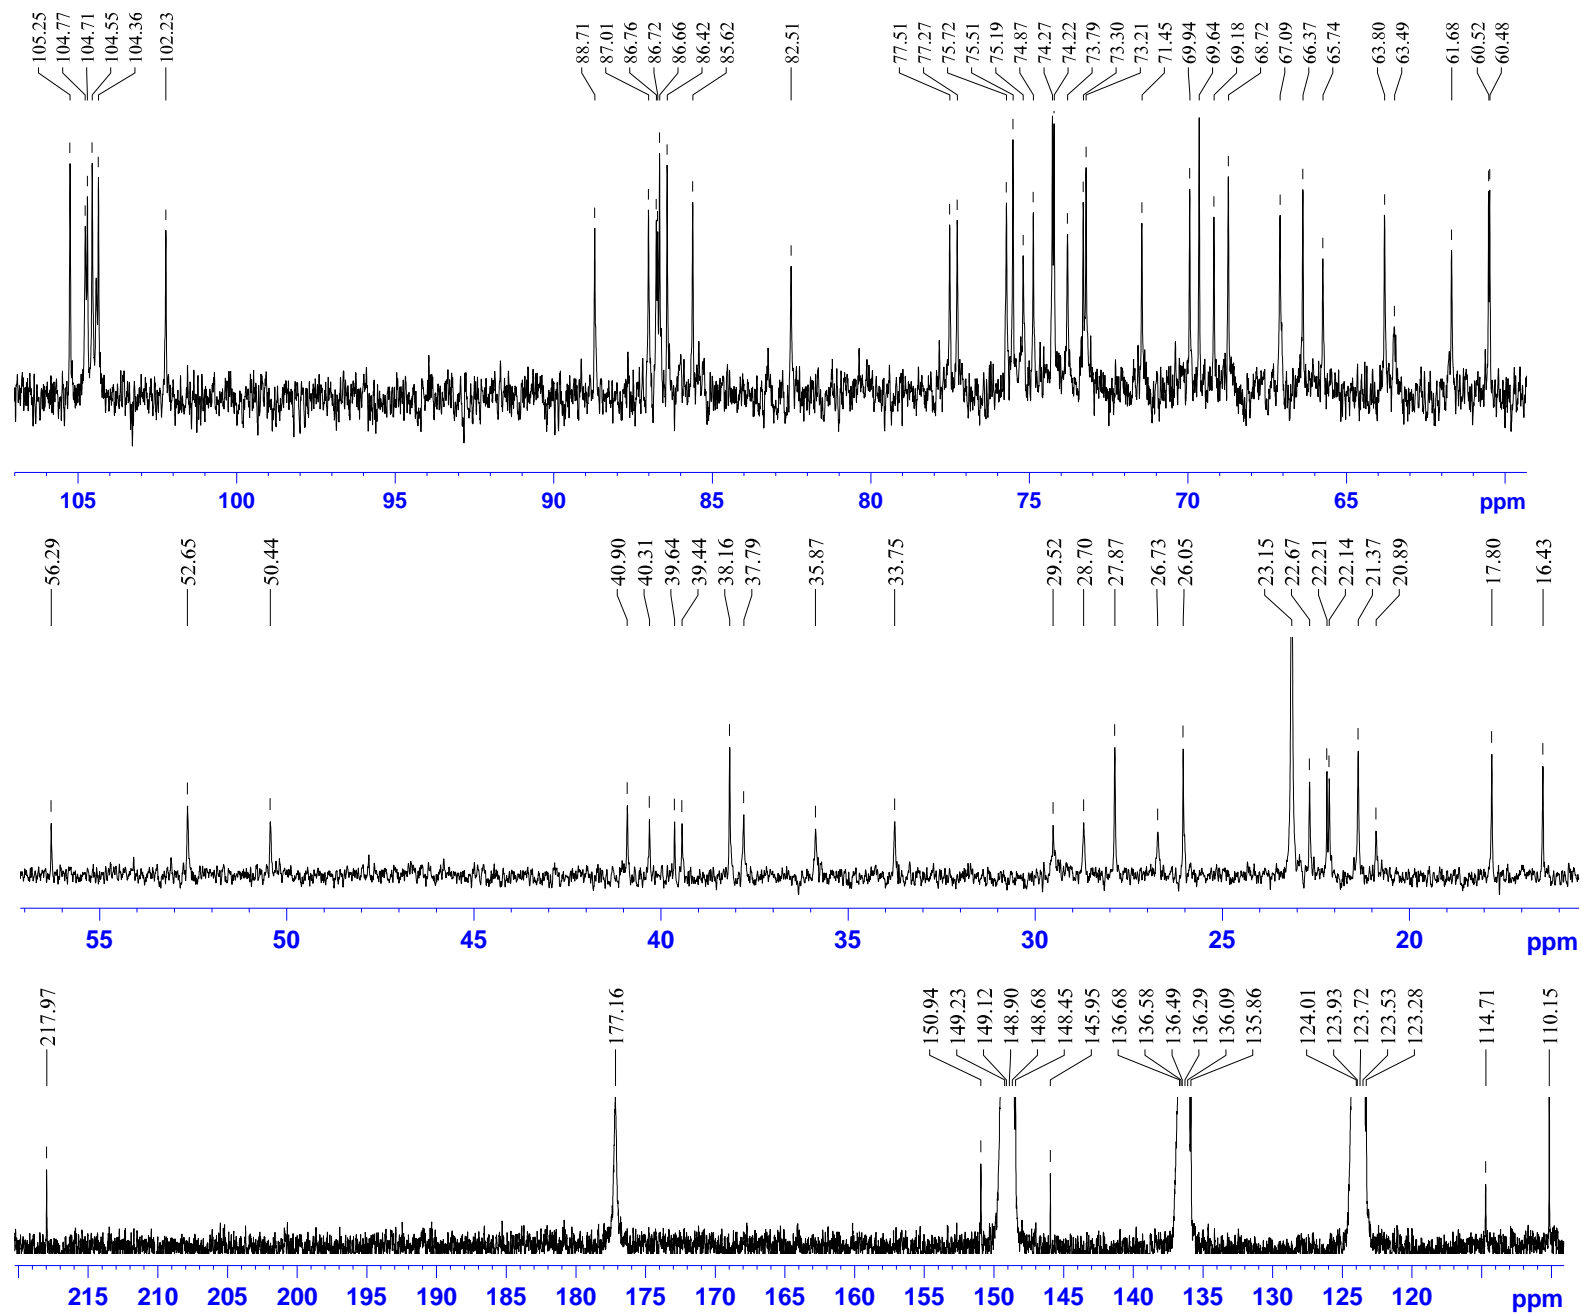

Figure S15. The  $^{13}\text{C}$  NMR (176.03 MHz) spectrum of chitonoidoside B (**3**) in  $\text{C}_5\text{D}_5\text{N}/\text{D}_2\text{O}$  (4/1)

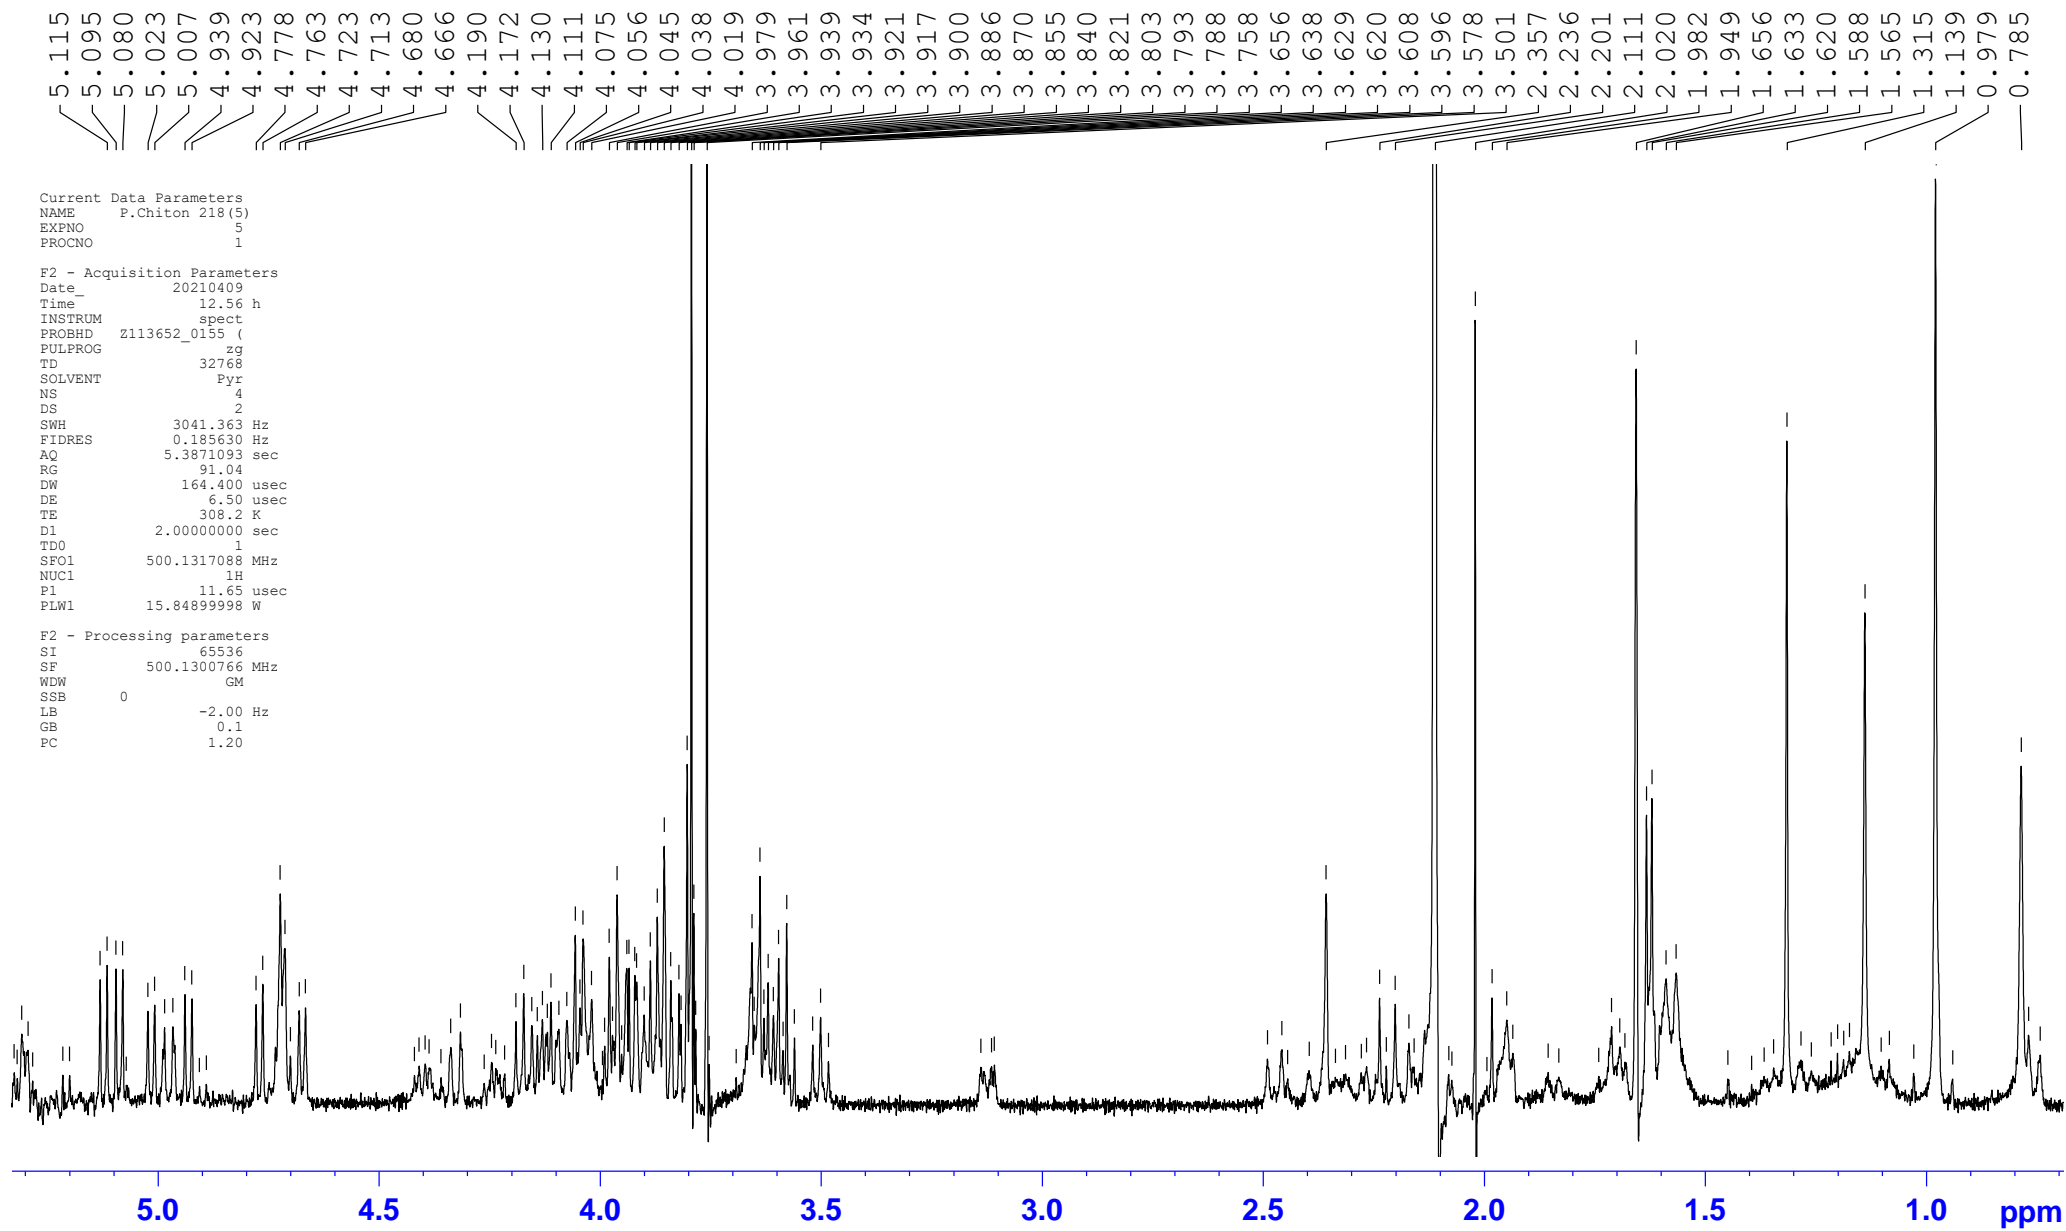

Figure S16. The  $^1\text{H}$  NMR (700.00 MHz) spectrum of chitonoidoside B (3) in  $\text{C}_5\text{D}_5\text{N}/\text{D}_2\text{O}$  (4/1)

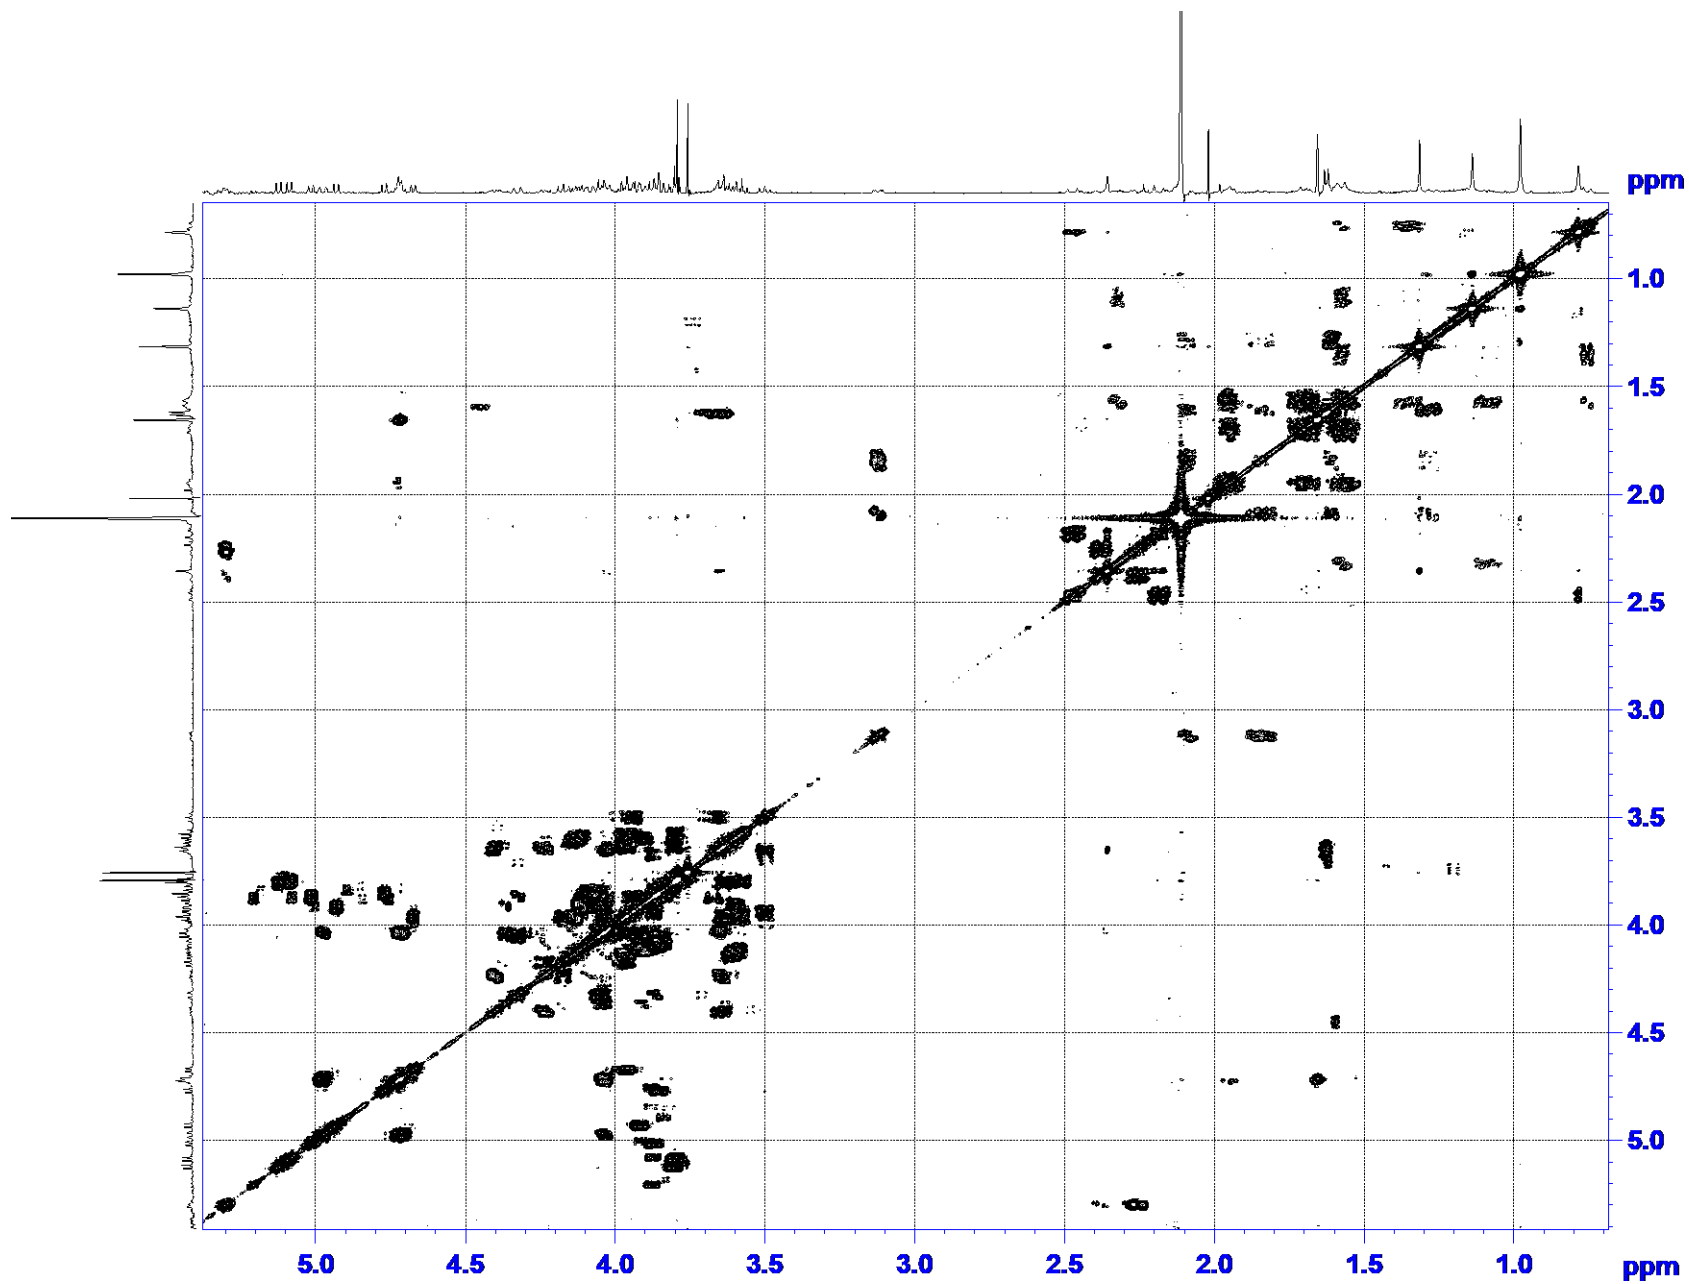

Figure S17. The COSY (700.00 MHz) spectrum of chitonoidoside B (3) in C<sub>5</sub>D<sub>5</sub>N/D<sub>2</sub>O (4/1)

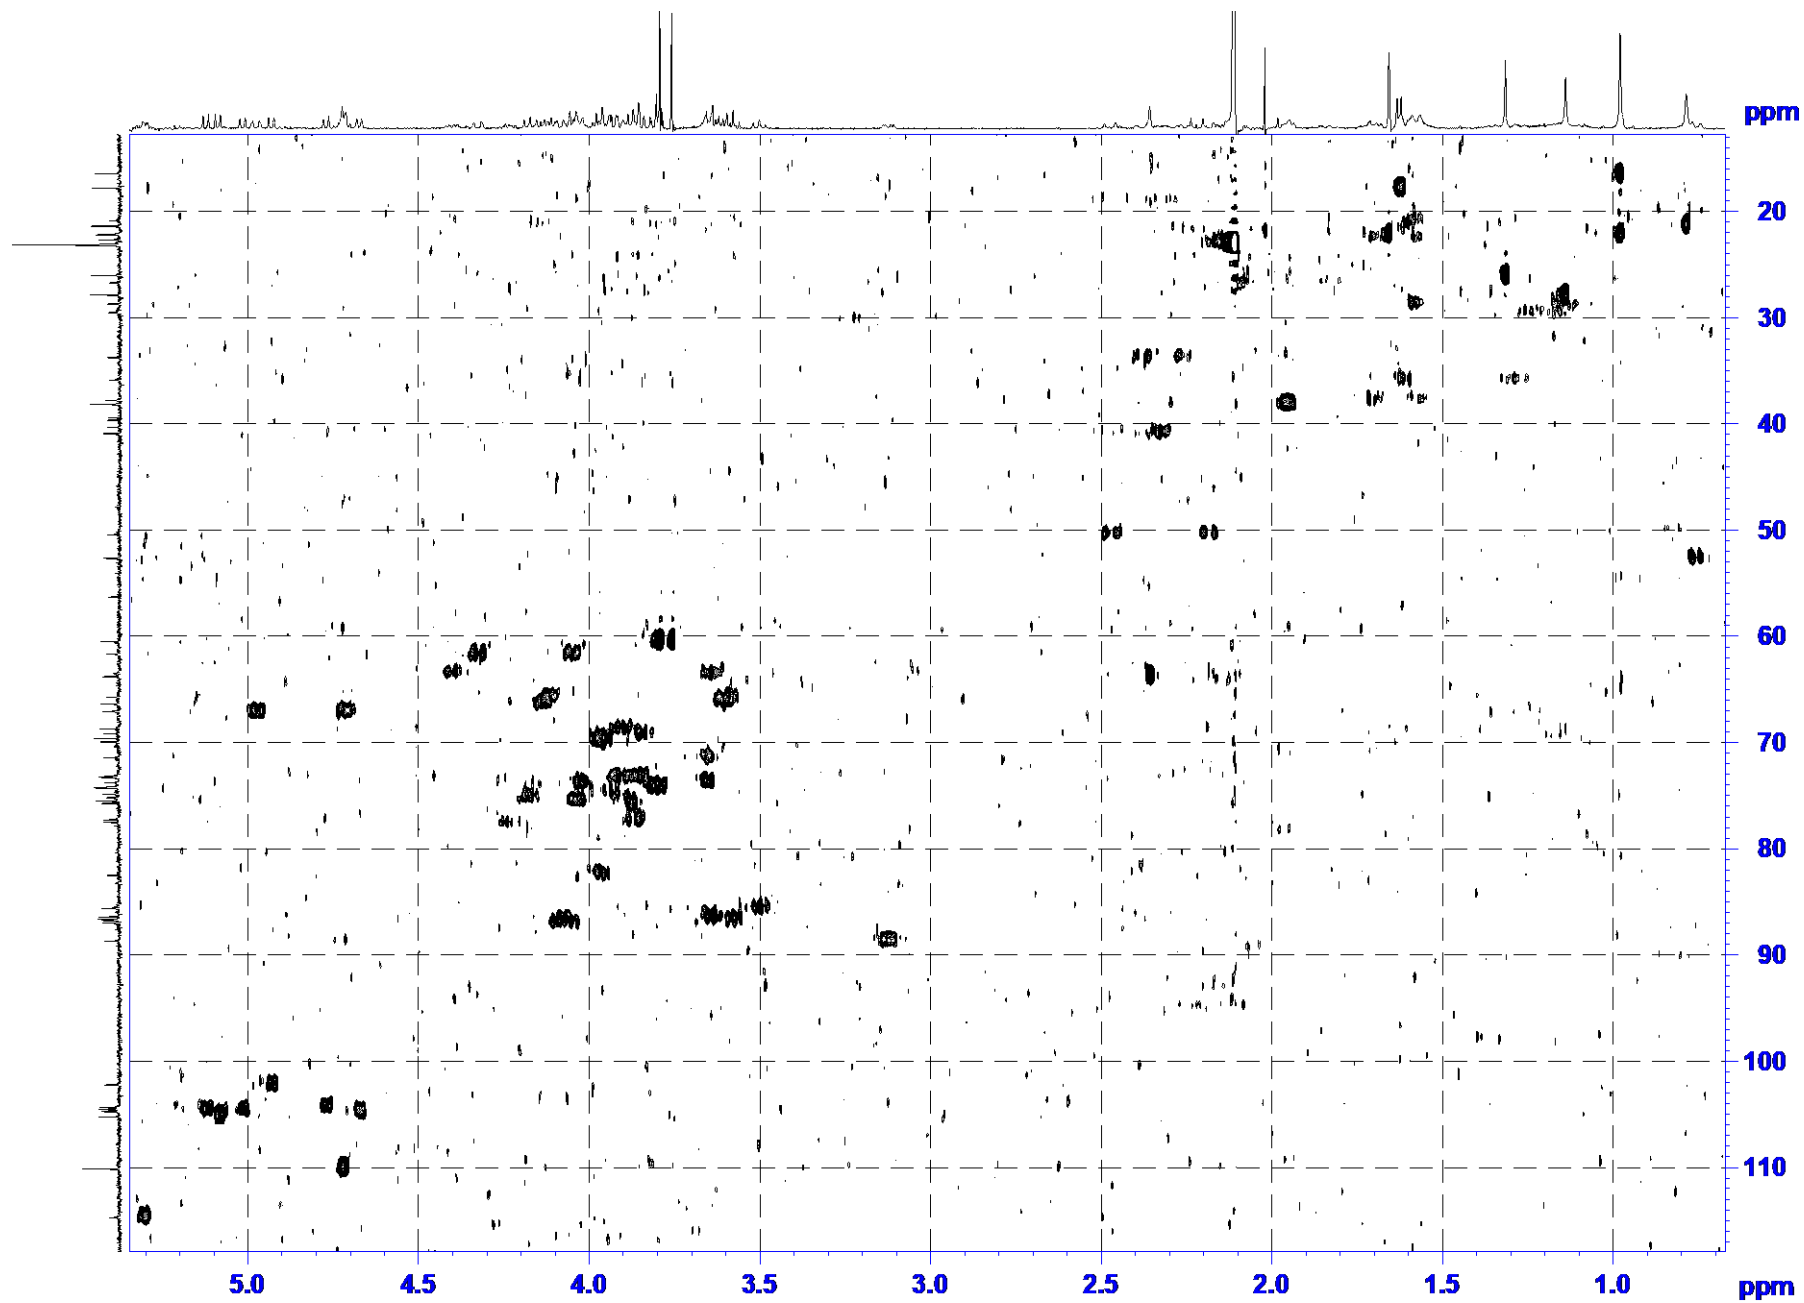

Figure S18. The HSQC (700.00 MHz) spectrum of chitonoidoside B (**3**) in C<sub>5</sub>D<sub>5</sub>N/D<sub>2</sub>O (4/1)

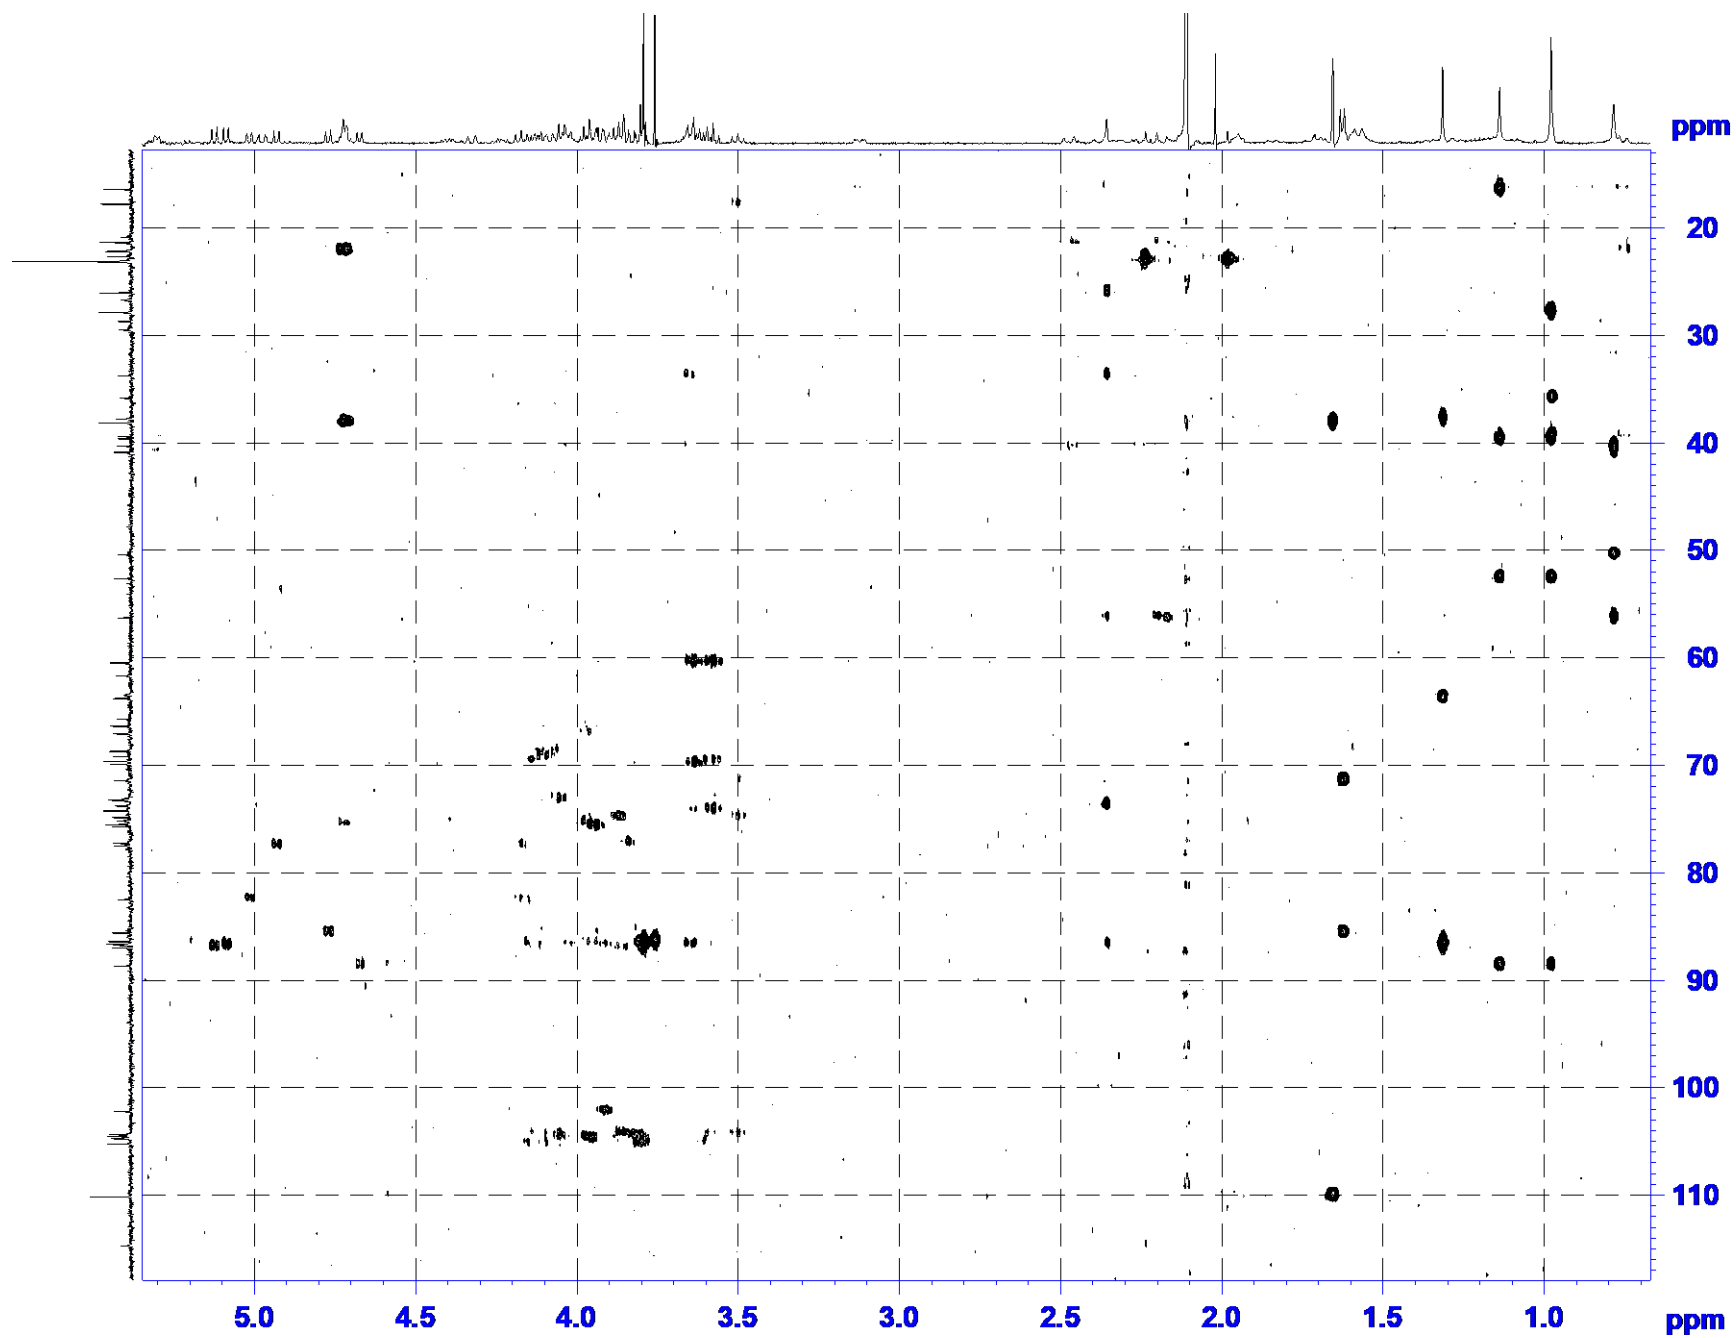

Figure S19. The HMBC (700.00 MHz) spectrum of chitonoidoside B (3) in  $\text{C}_5\text{D}_5\text{N}/\text{D}_2\text{O}$  (4/1)



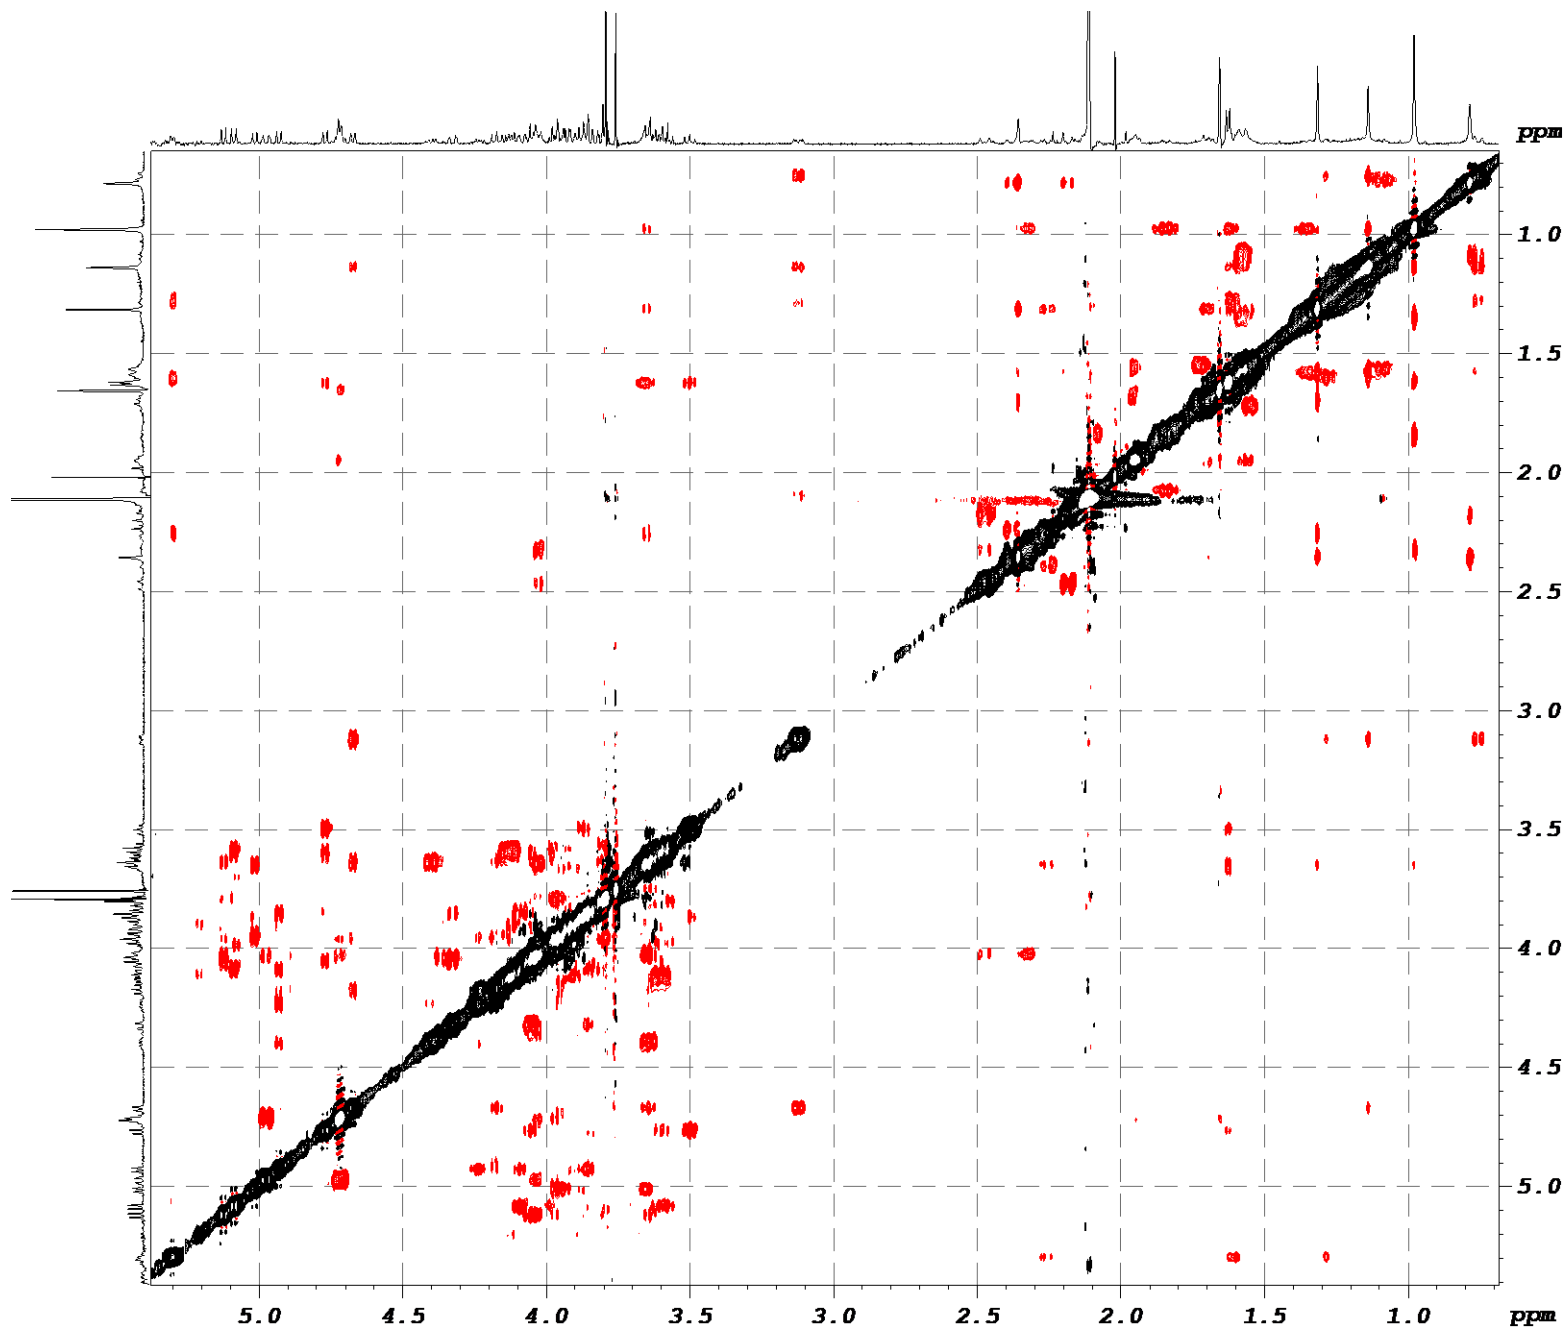

Figure S20. The ROESY (700.00 MHz) spectrum of chitonoidoside B (3) in  $\text{C}_5\text{D}_5\text{N}/\text{D}_2\text{O}$  (4/1)

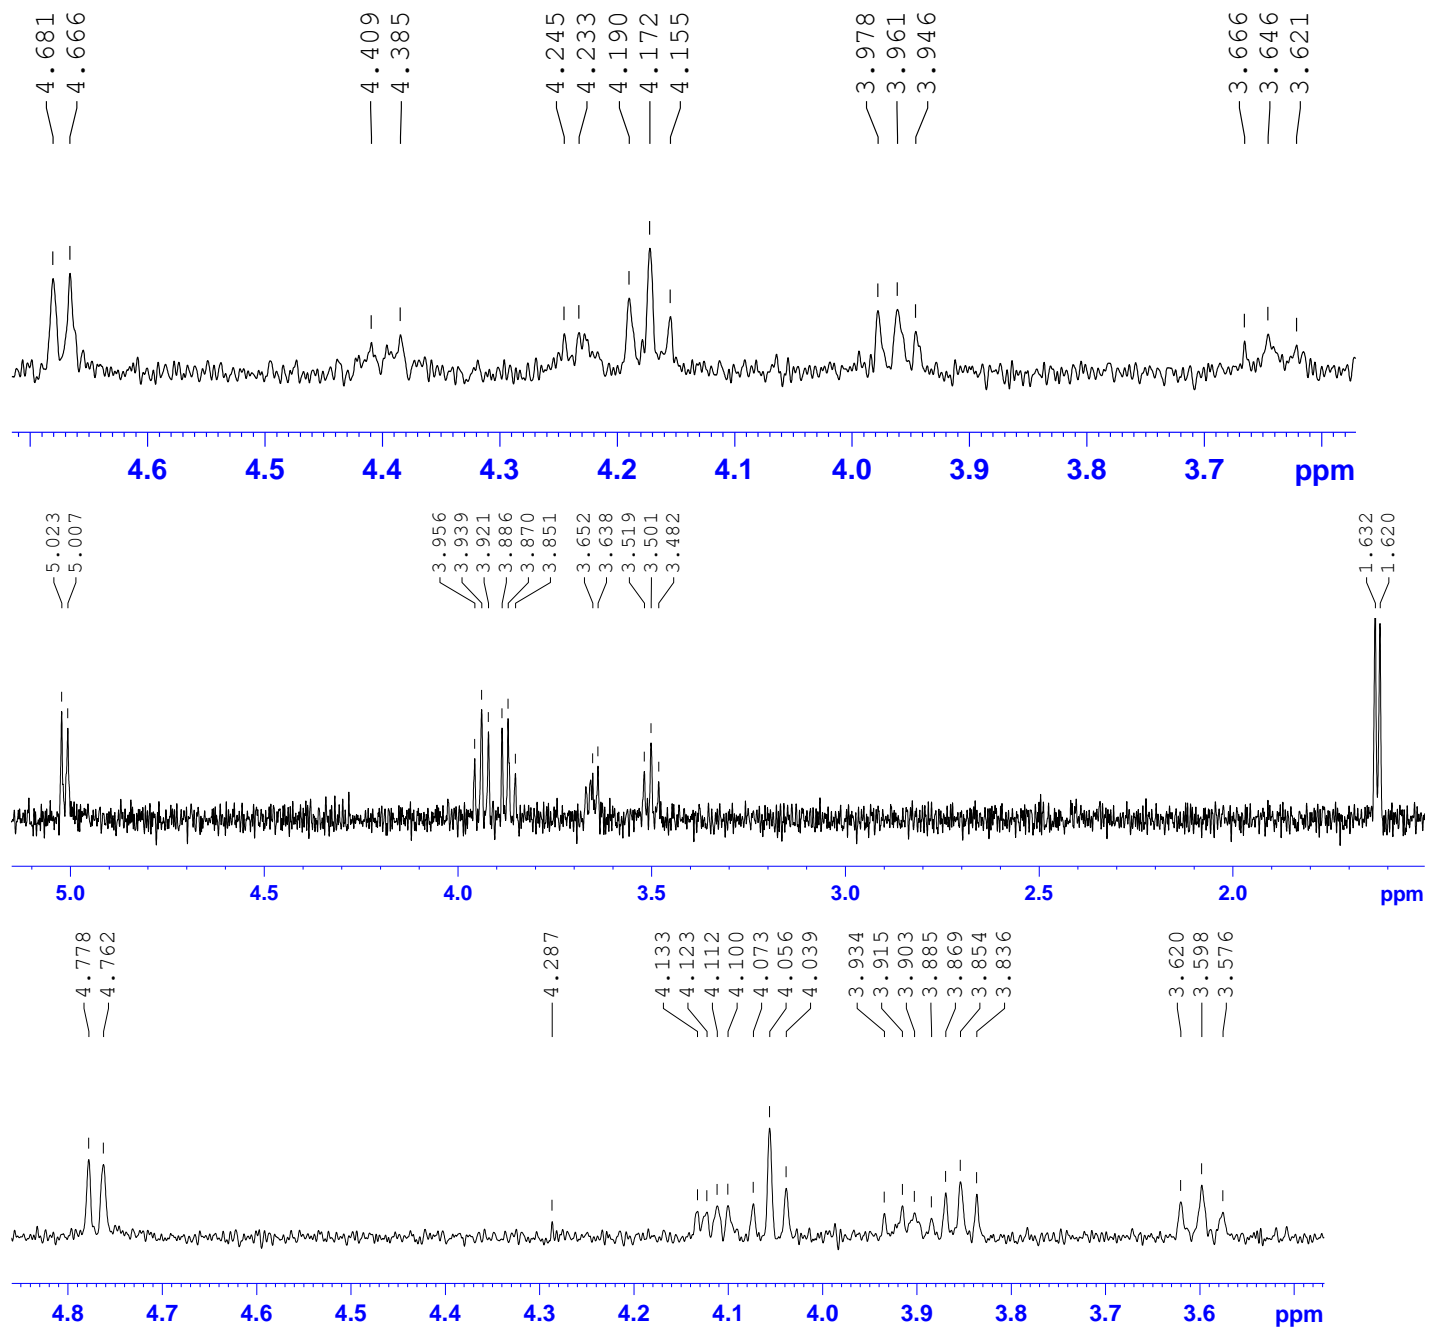

Figure S21. 1 D TOCSY (700.00 MHz) spectra of Xyl1, Qui2 and Xyl3 of chitonoidoside B (**3**) in C<sub>5</sub>D<sub>5</sub>N/D<sub>2</sub>O (4/1)

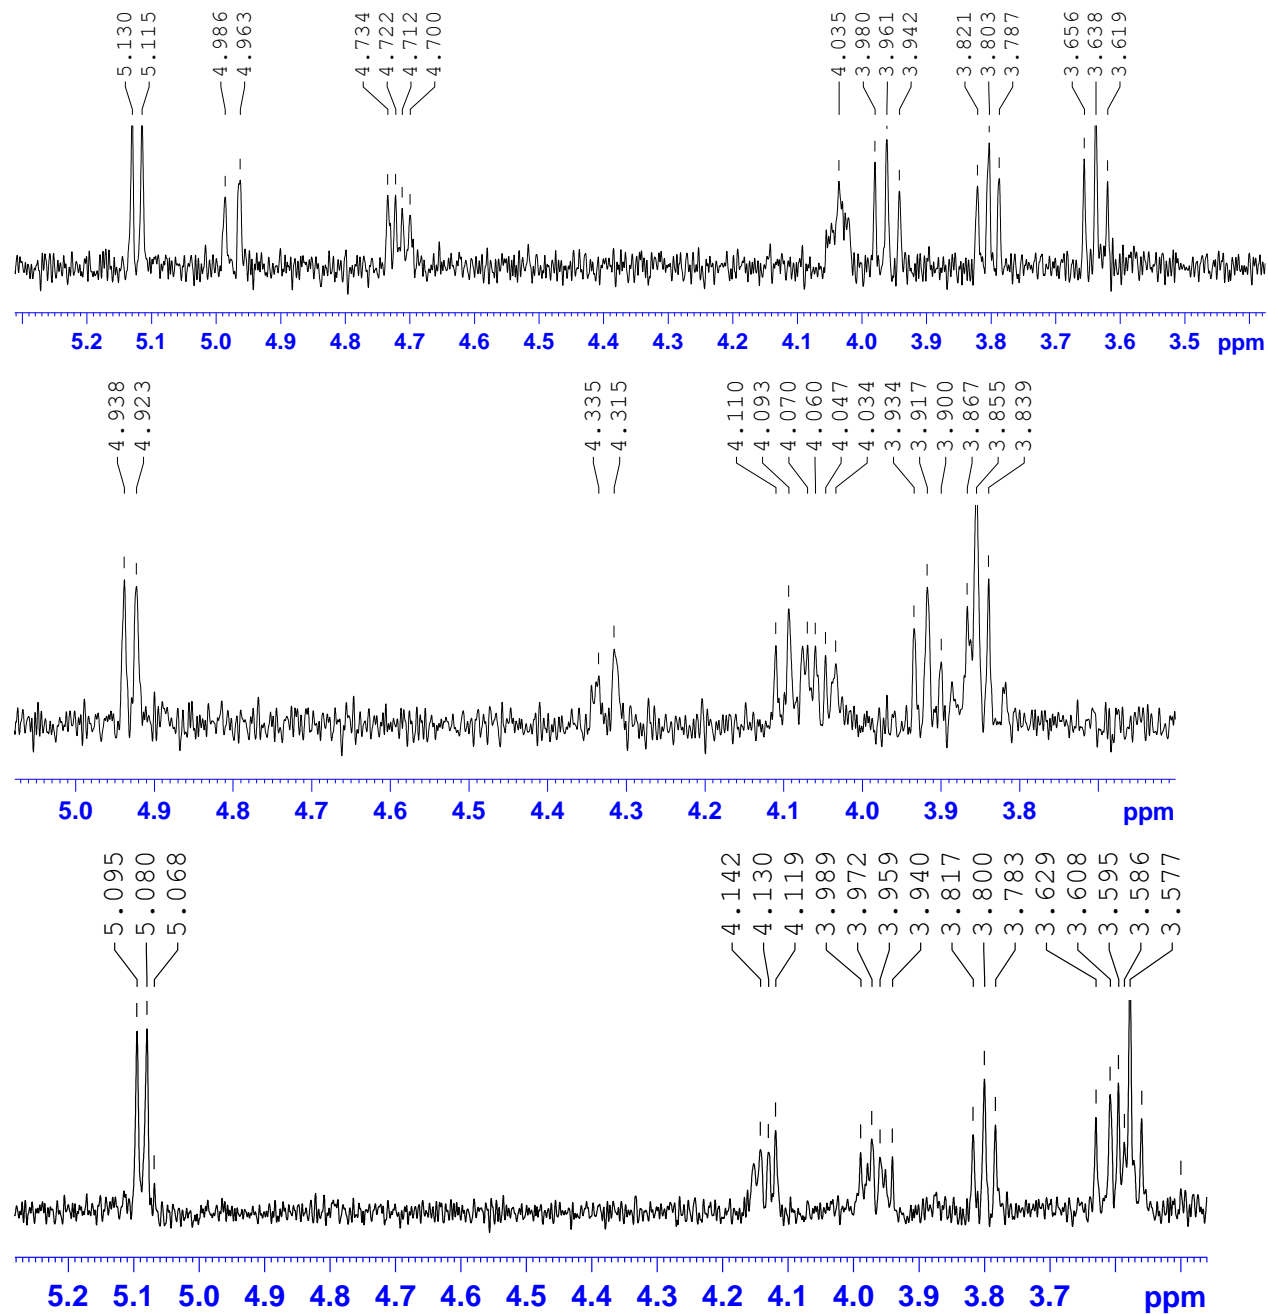

Figure S22. 1 D TOCSY (700.00 MHz) spectra of MeGlc4, Glc5 and MeXyl6 of chitonoidoside B (3) in C<sub>5</sub>D<sub>5</sub>N/D<sub>2</sub>O (4/1)

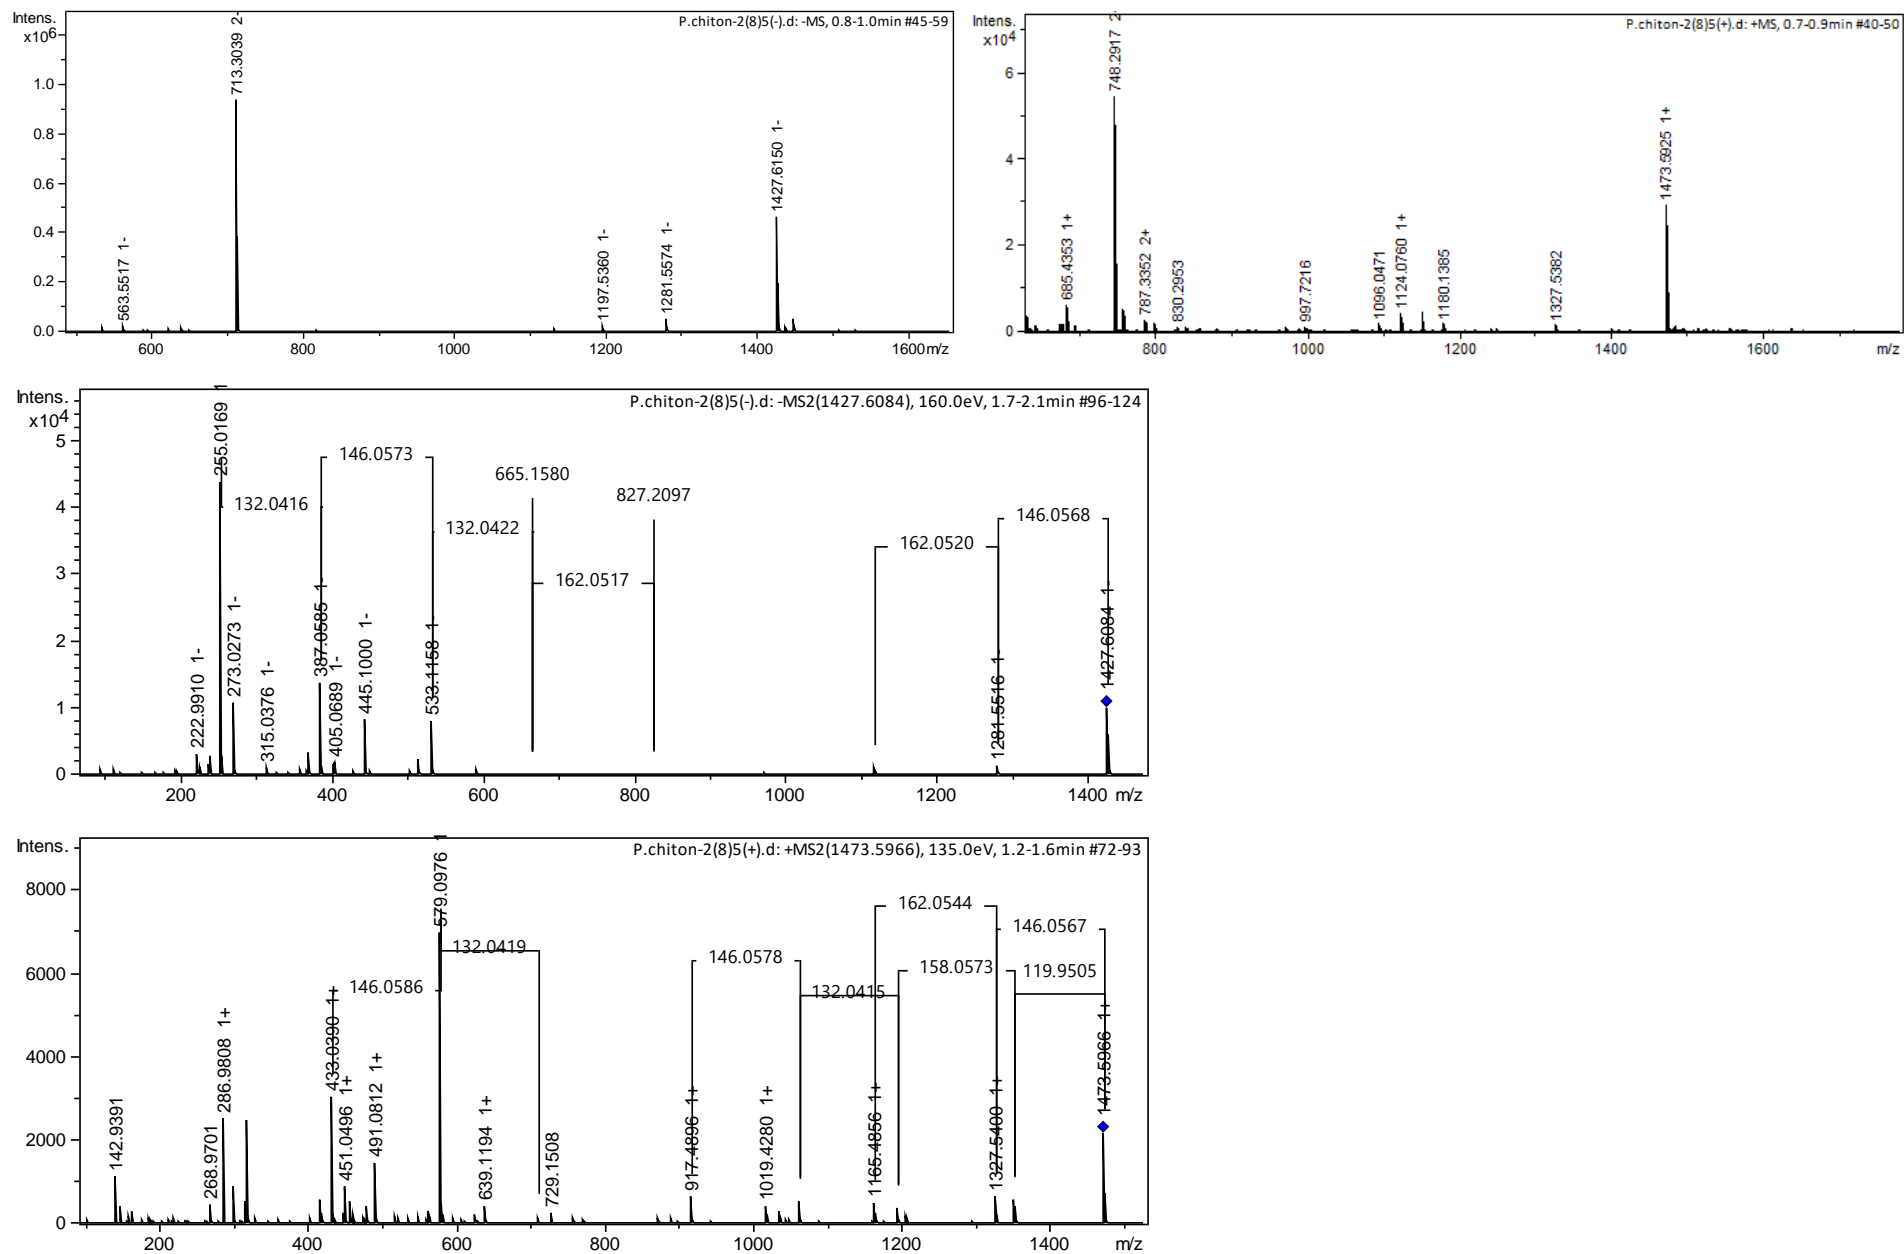

Figure S23. HR-ESI-MS and ESI-MS/MS spectra of chitonoidoside B (3)

**Table S3.** <sup>13</sup>C and <sup>1</sup>H NMR chemical shifts, HMBC and ROESY correlations of the aglycone moiety of chitonoidoside C (4).

| Position | $\delta_C$ mult. <sup>a</sup> | $\delta_H$ mult. (J in Hz) <sup>b</sup> | HMBC                      | ROESY               |
|----------|-------------------------------|-----------------------------------------|---------------------------|---------------------|
| 1        | 36.0 CH <sub>2</sub>          | 1.73 m                                  |                           | H-11, H-19          |
|          |                               | 1.32 m                                  |                           | H-11                |
| 2        | 26.7 CH <sub>2</sub>          | 2.08 m                                  |                           |                     |
|          |                               | 1.87 m                                  |                           | H-19, H-30          |
| 3        | 88.7 CH                       | 3.14 dd (4.6; 11.7)                     |                           | H-1, H-31, H1-Xyl1  |
| 4        | 39.5 C                        |                                         |                           |                     |
| 5        | 52.7 CH                       | 0.79 brd (11.5)                         | C: 10, 19, 30             | H-1, H-3, H-31      |
| 6        | 20.9 CH <sub>2</sub>          | 1.58 m                                  |                           | H-31                |
|          |                               | 1.39 m                                  |                           | H-19, H-30          |
| 7        | 28.3 CH <sub>2</sub>          | 1.57 m                                  |                           |                     |
|          |                               | 1.16 m                                  |                           | H-5, H-32           |
| 8        | 38.6 CH                       | 3.12 m                                  |                           | H-15, H-19          |
| 9        | 150.9 C                       |                                         |                           |                     |
| 10       | 39.7 C                        |                                         |                           |                     |
| 11       | 111.1 CH                      | 5.28 m                                  | C: 8, 13                  | H-1                 |
| 12       | 31.9 CH <sub>2</sub>          | 2.62 d (16.9)                           | C: 18                     | H-17, H-32          |
|          |                               | 2.47 dd (5.5; 16.9)                     | C: 14                     | H-21                |
| 13       | 55.8 C                        |                                         |                           |                     |
| 14       | 42.0 C                        |                                         |                           |                     |
| 15       | 51.9 CH <sub>2</sub>          | 2.38 d (15.5)                           | C: 13, 16, 17, 32         | H-7, H-32           |
|          |                               | 2.09 d (15.5)                           | C: 8, 14, 16, 32          | H-8                 |
| 16       | 214.5 C                       |                                         |                           |                     |
| 17       | 61.2 CH                       | 2.86 s                                  | C: 12, 13, 16, 18, 20, 21 | H-12, H-21, H-32    |
| 18       | 176.7 C                       |                                         |                           |                     |
| 19       | 21.9 CH <sub>3</sub>          | 1.27 s                                  | C: 1, 5, 9, 10            | H-1, H-2, H-8, H-30 |
| 20       | 83.6 C                        |                                         |                           |                     |
| 21       | 26.7 CH <sub>3</sub>          | 1.43 s                                  | C: 17, 20, 22             | H-12, H-17          |
| 22       | 38.1 CH <sub>2</sub>          | 1.71 m                                  |                           |                     |
|          |                               | 1.55 m                                  |                           |                     |
| 23       | 22.1 CH <sub>2</sub>          | 1.70 m                                  |                           |                     |
|          |                               | 1.43 m                                  |                           |                     |
| 24       | 37.7 CH <sub>2</sub>          | 1.89 m                                  | C: 22, 25, 26, 27         | H-21                |
| 25       | 145.5 C                       |                                         |                           |                     |
| 26       | 110.4 CH <sub>2</sub>         | 4.70 brs                                | C: 24, 27                 |                     |
|          |                               | 4.68 brs                                | C: 24, 27                 |                     |
| 27       | 22.0 CH <sub>3</sub>          | 1.62 s                                  | C: 24, 25, 26             |                     |
| 30       | 16.5 CH <sub>3</sub>          | 0.99 s                                  | C: 3, 4, 5, 31            | H-31                |
| 31       | 27.9 CH <sub>3</sub>          | 1.14 s                                  | C: 3, 4, 5, 30            | H-3, H-5, H-30      |
| 32       | 20.5 CH <sub>3</sub>          | 0.88 s                                  | C: 8, 13, 14, 15          | H-7, H-12, H-17     |

<sup>a</sup>Recorded at 176.03 MHz in C<sub>5</sub>D<sub>5</sub>N/D<sub>2</sub>O (4/1). <sup>b</sup>Recorded at 700.00 MHz in C<sub>5</sub>D<sub>5</sub>N/D<sub>2</sub>O (4/1).

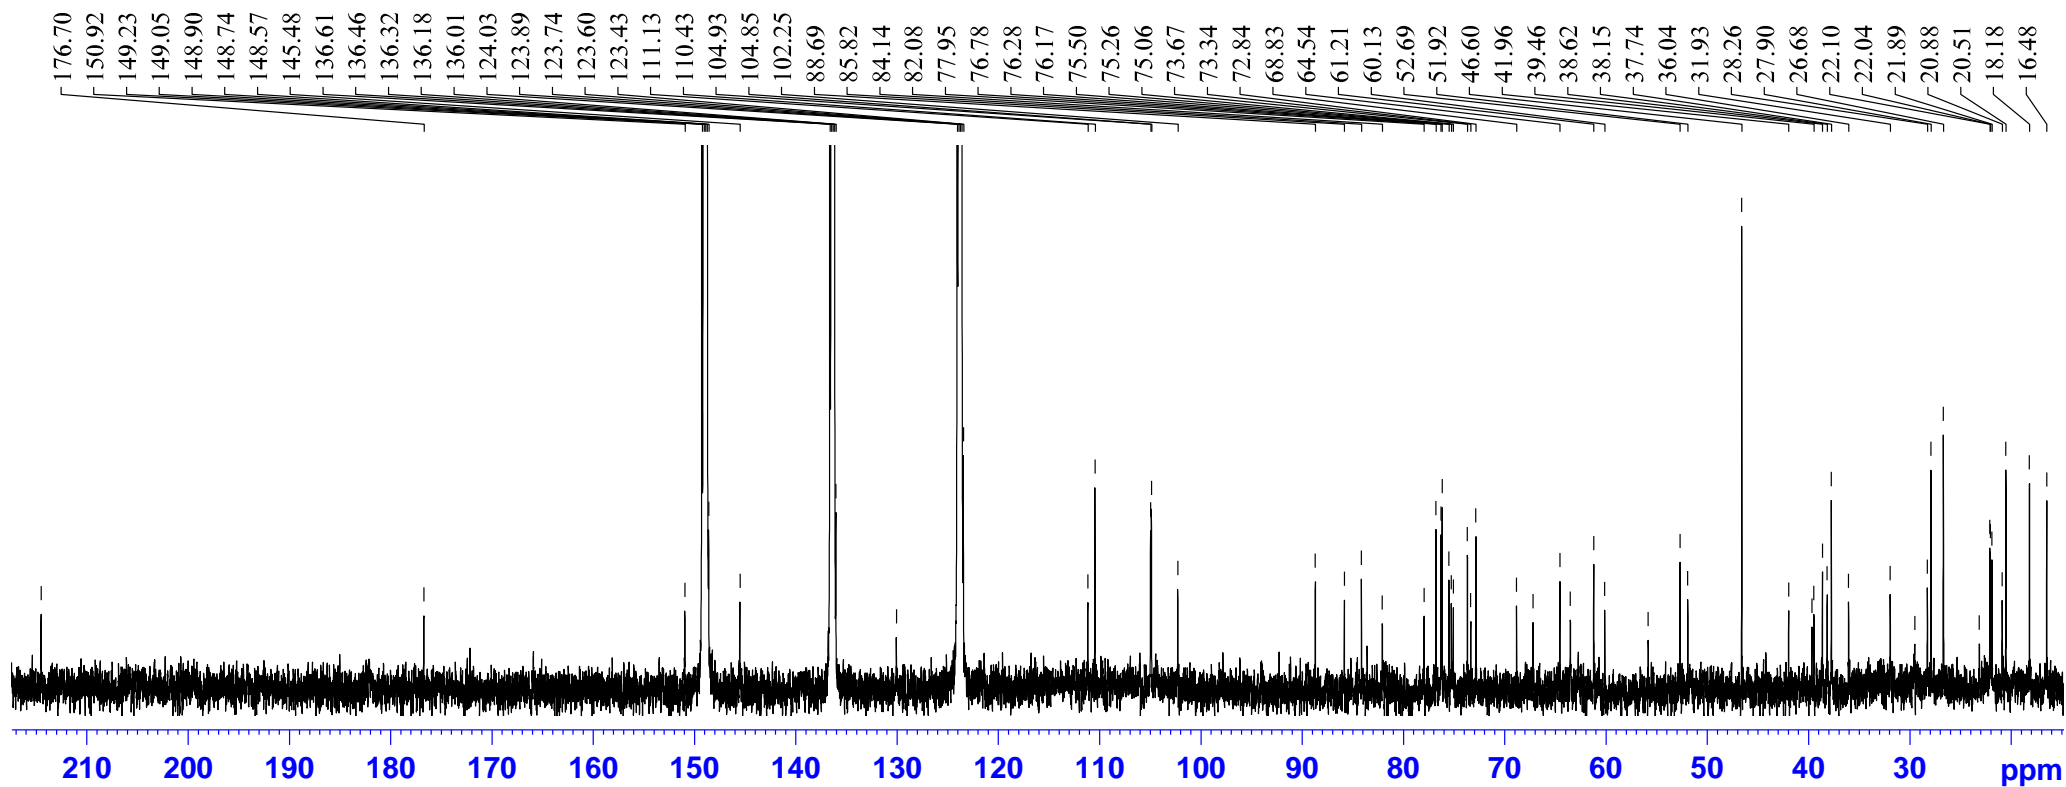

Figure S24. The  $^{13}\text{C}$  NMR (176.03 MHz) spectrum of chitonoidoside C (**4**) in  $\text{C}_5\text{D}_5\text{N}/\text{D}_2\text{O}$  (4/1)

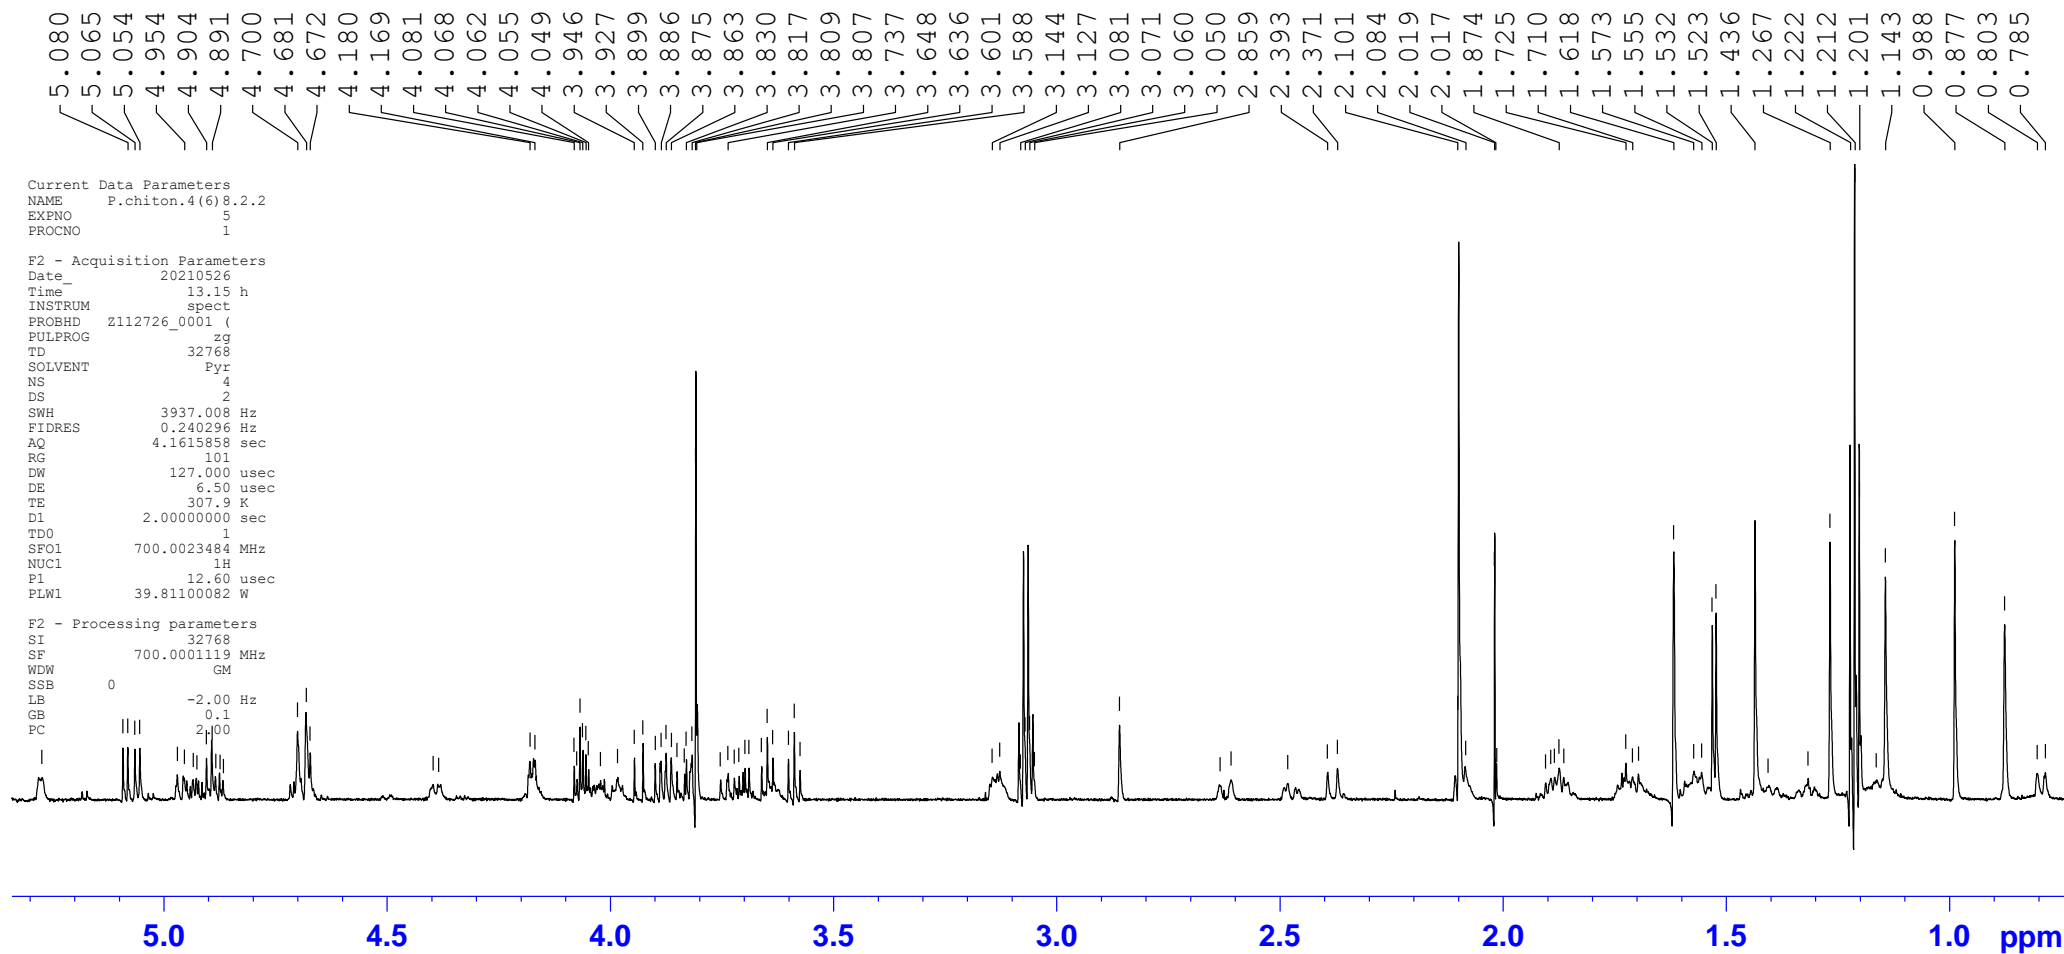

Figure S25. The  $^1\text{H}$  NMR (700.00 MHz) spectrum of chitonoidoside C (**4**) in  $\text{C}_5\text{D}_5\text{N}/\text{D}_2\text{O}$  (4/1)

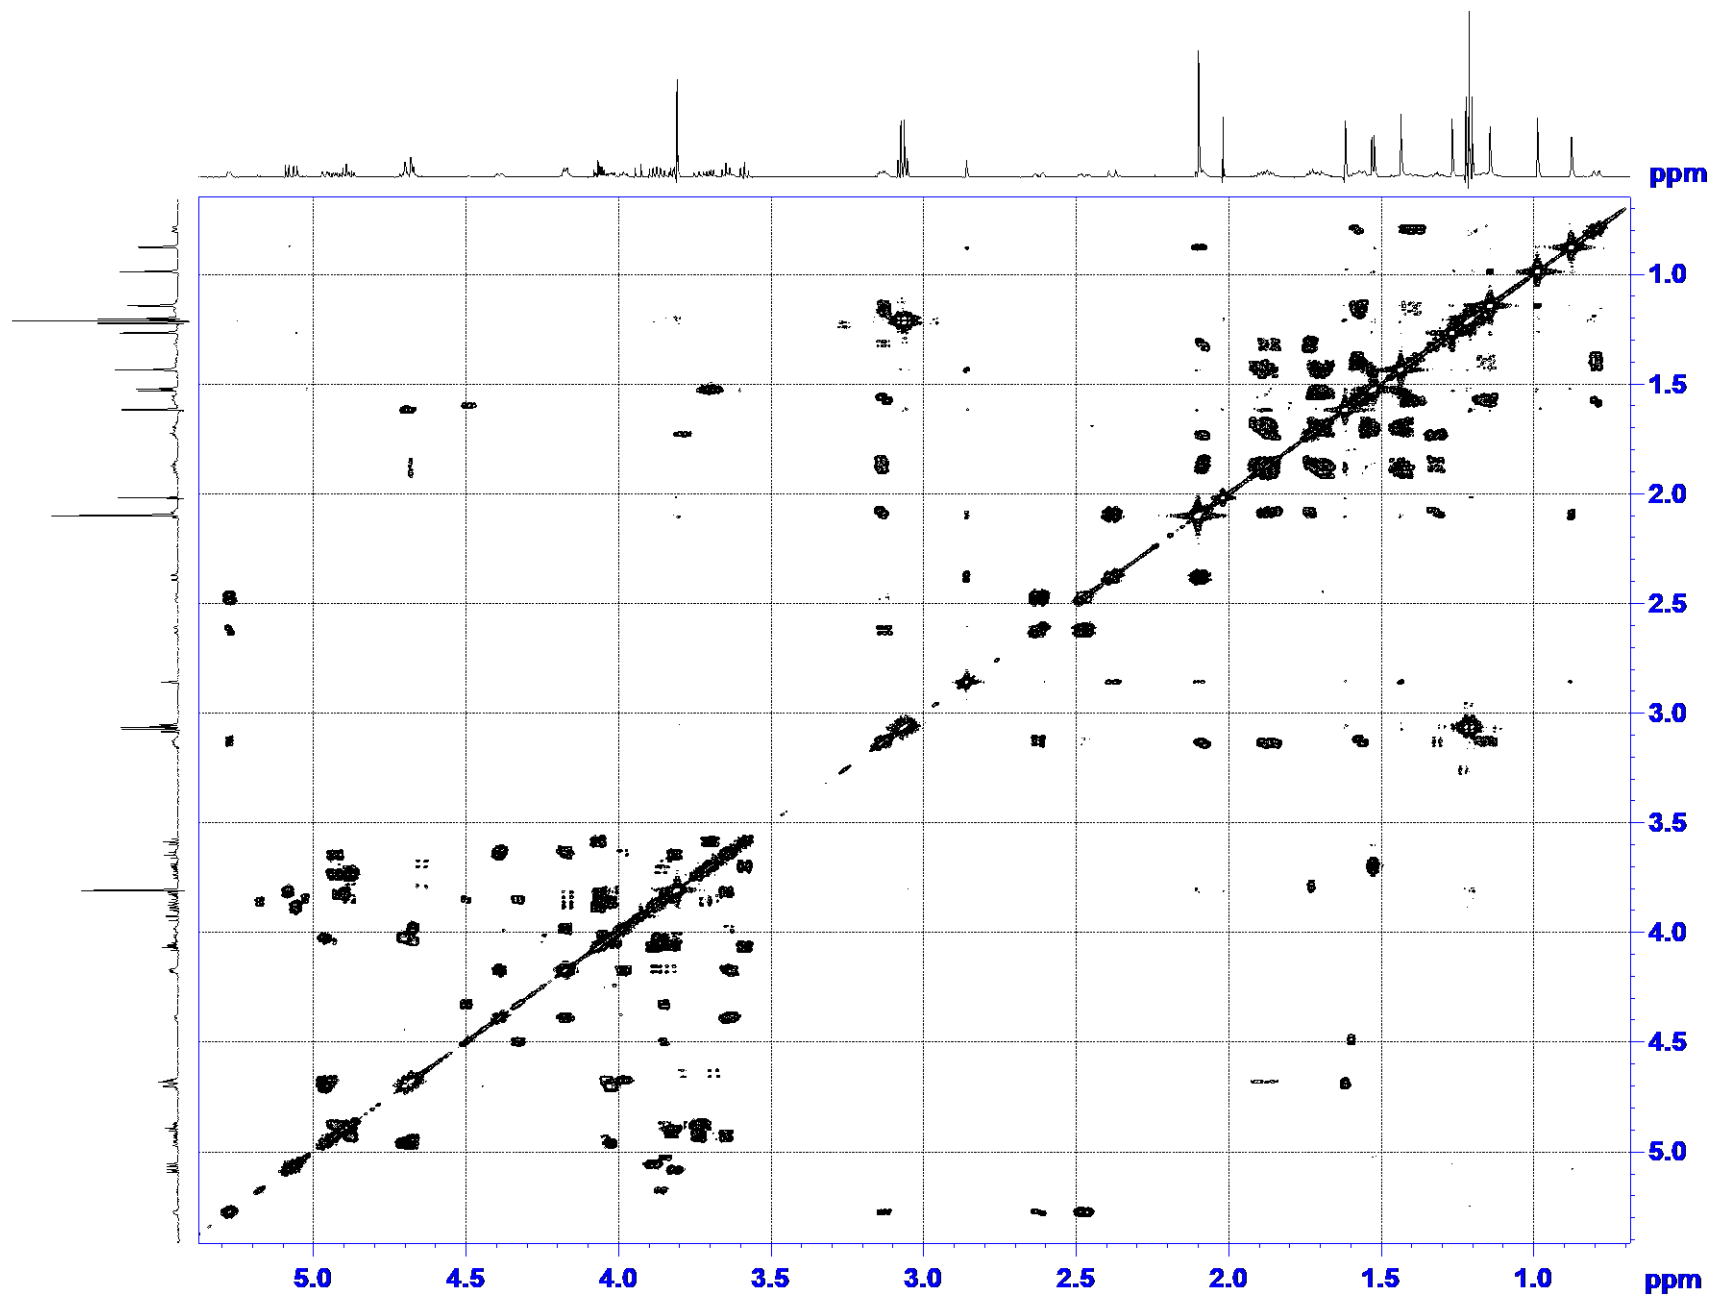

Figure S26. The COSY (700.00 MHz) spectrum of chitonoidoside C (**4**) in C<sub>5</sub>D<sub>5</sub>N/D<sub>2</sub>O (4/1)



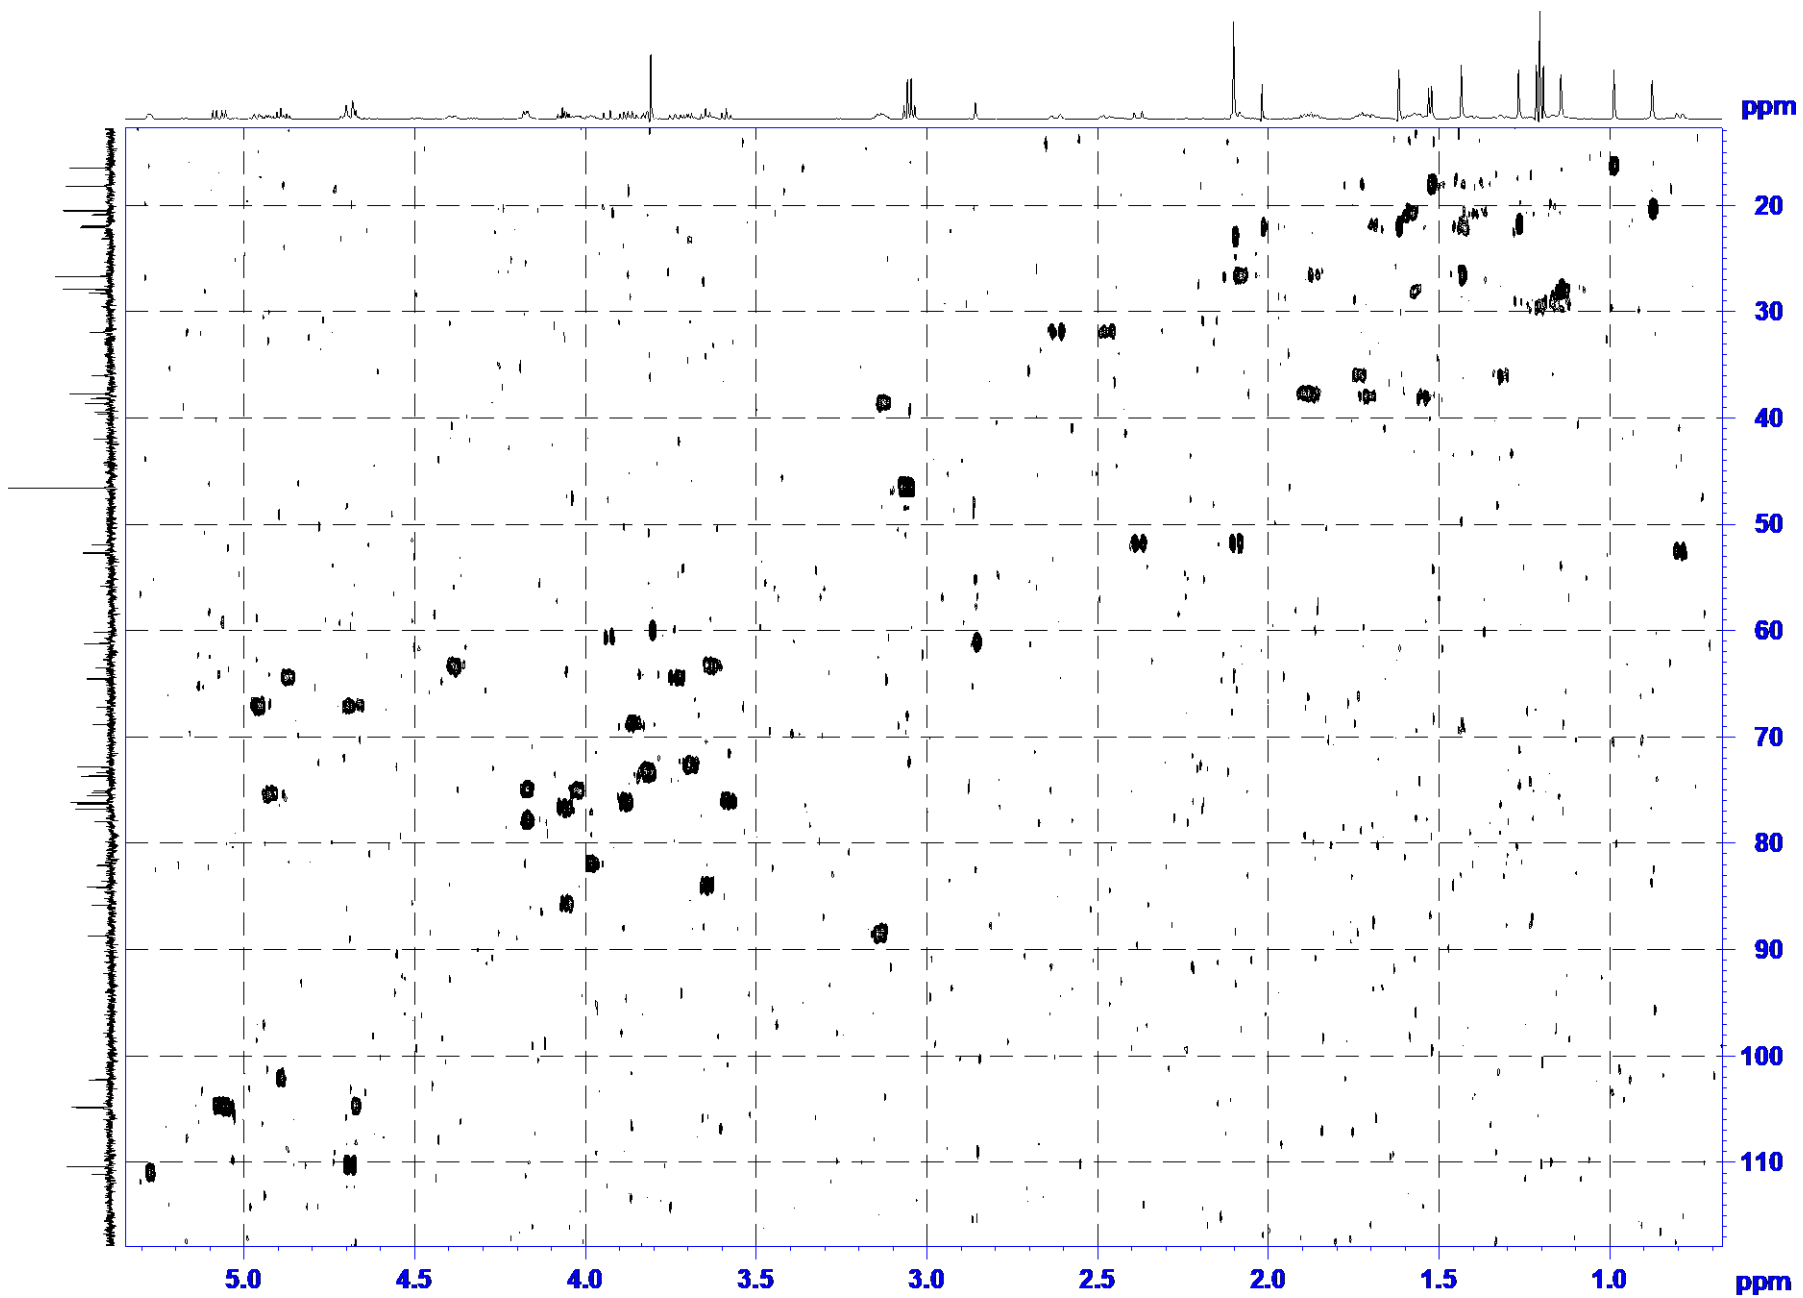

Figure S27. The HSQC (700.00 MHz) spectrum of chitonoidoside C (**4**) in C<sub>5</sub>D<sub>5</sub>N/D<sub>2</sub>O (4/1)

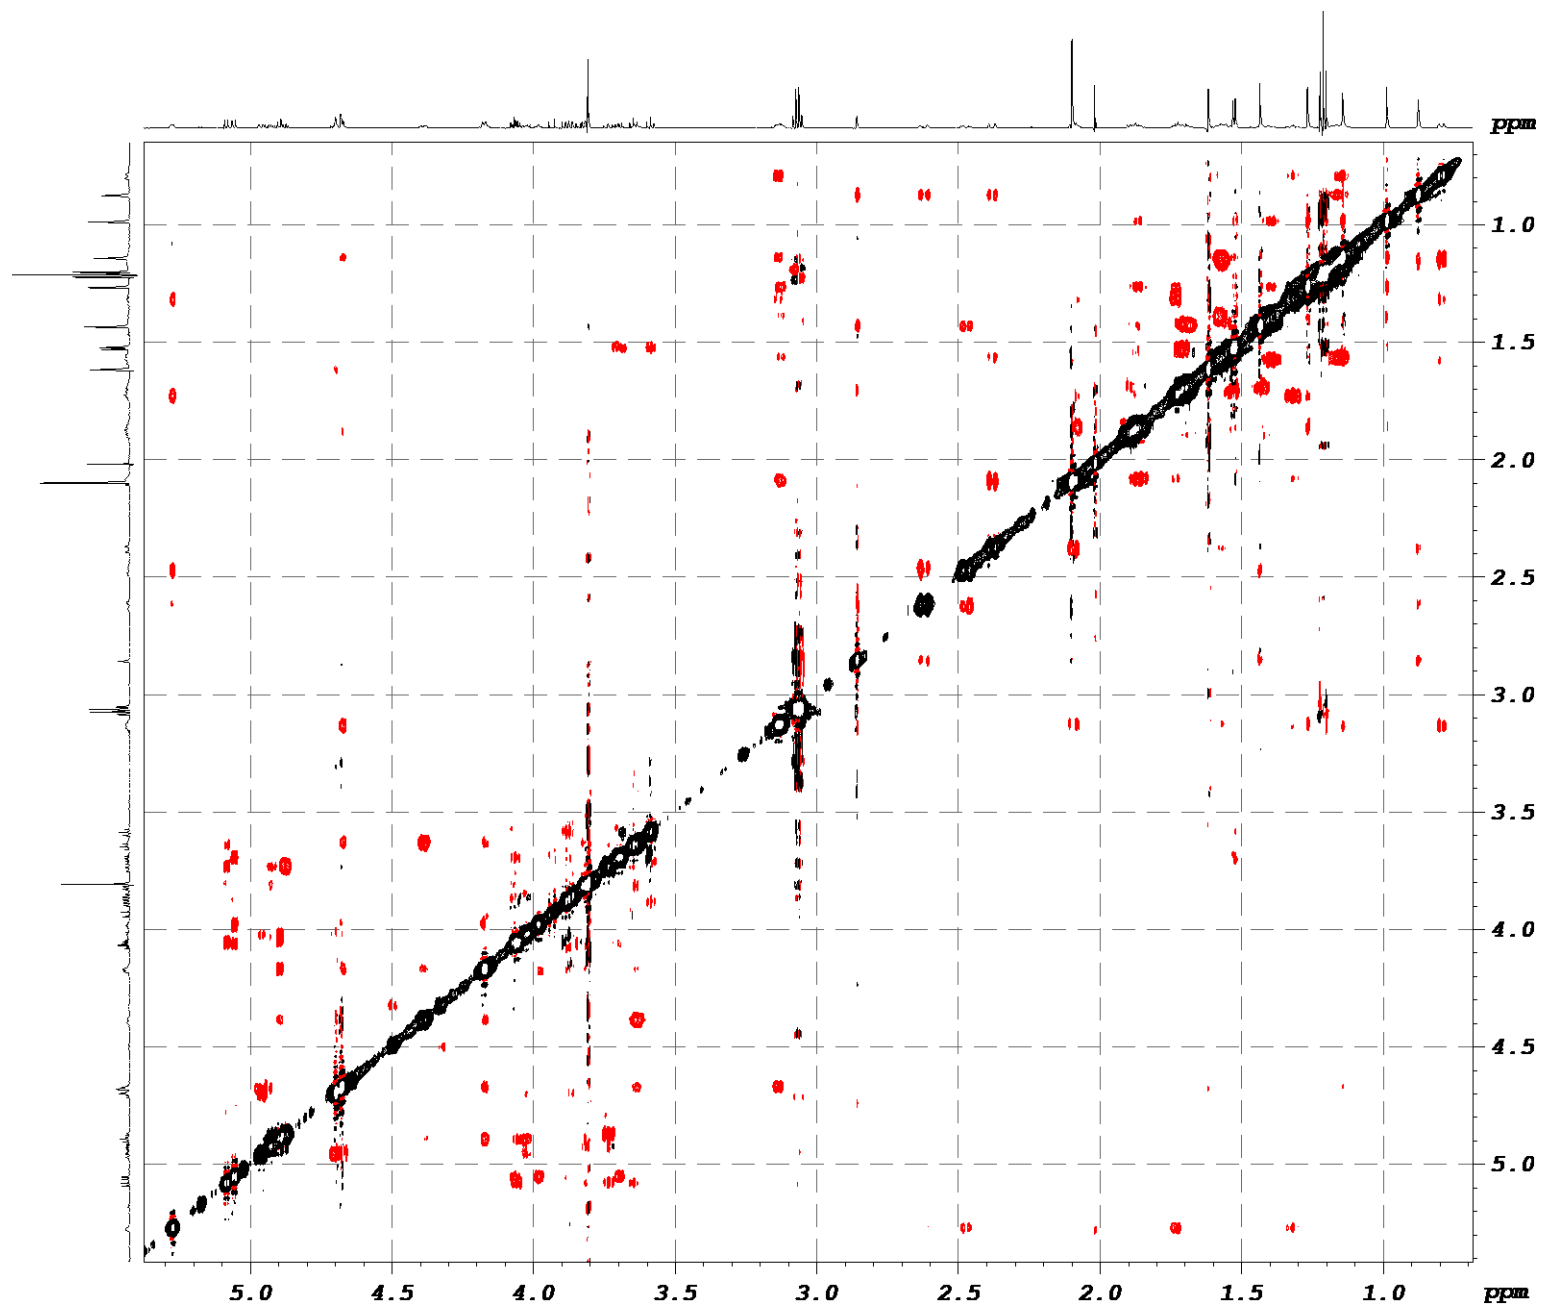

Figure S28. The ROESY (700.00 MHz) spectrum of chitonoidoside C (4) in C<sub>5</sub>D<sub>5</sub>N/D<sub>2</sub>O (4/1)

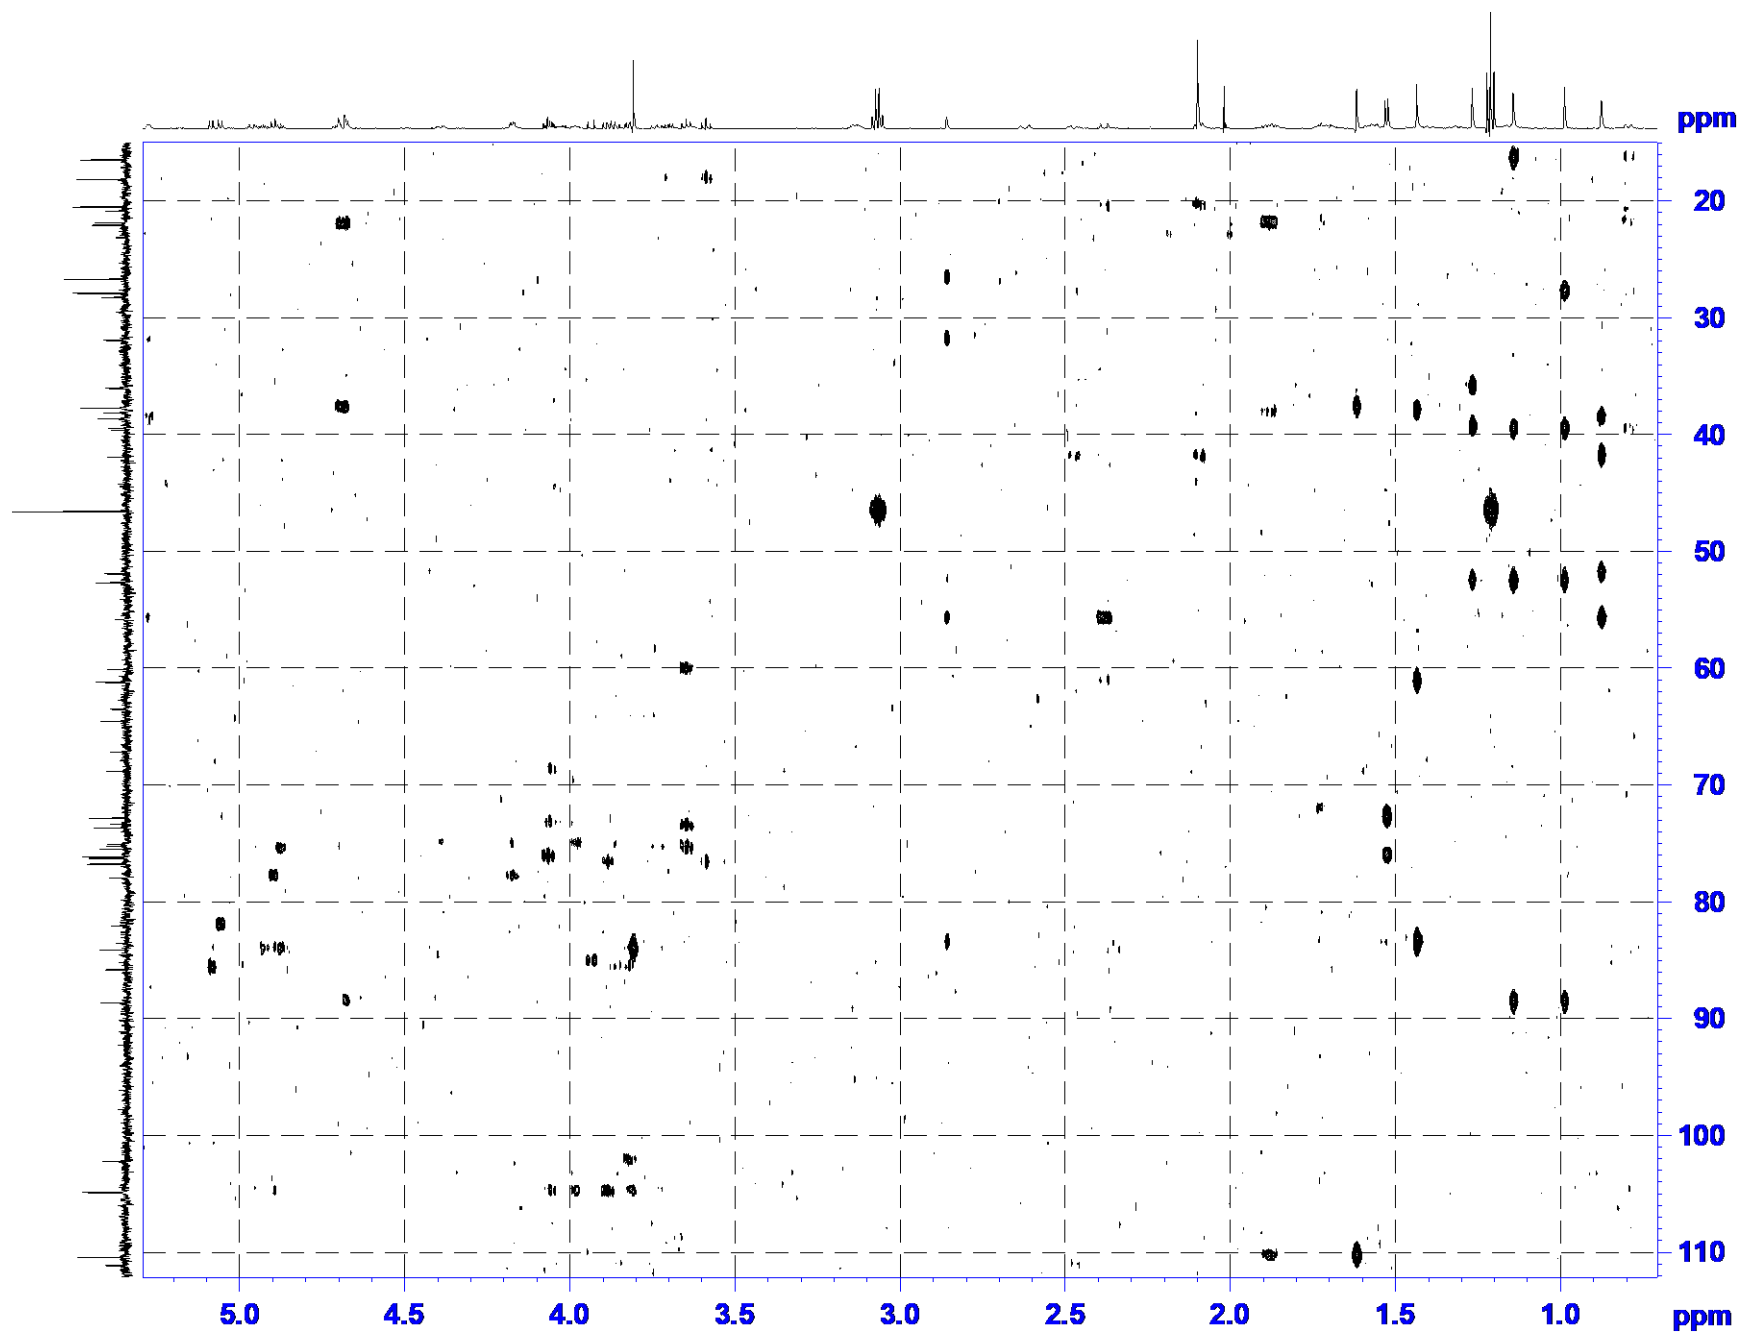

Figure S29. The HMBC (700.00 MHz) spectrum of chitonoidoside C (4) in  $\text{C}_5\text{D}_5\text{N}/\text{D}_2\text{O}$  (4/1)

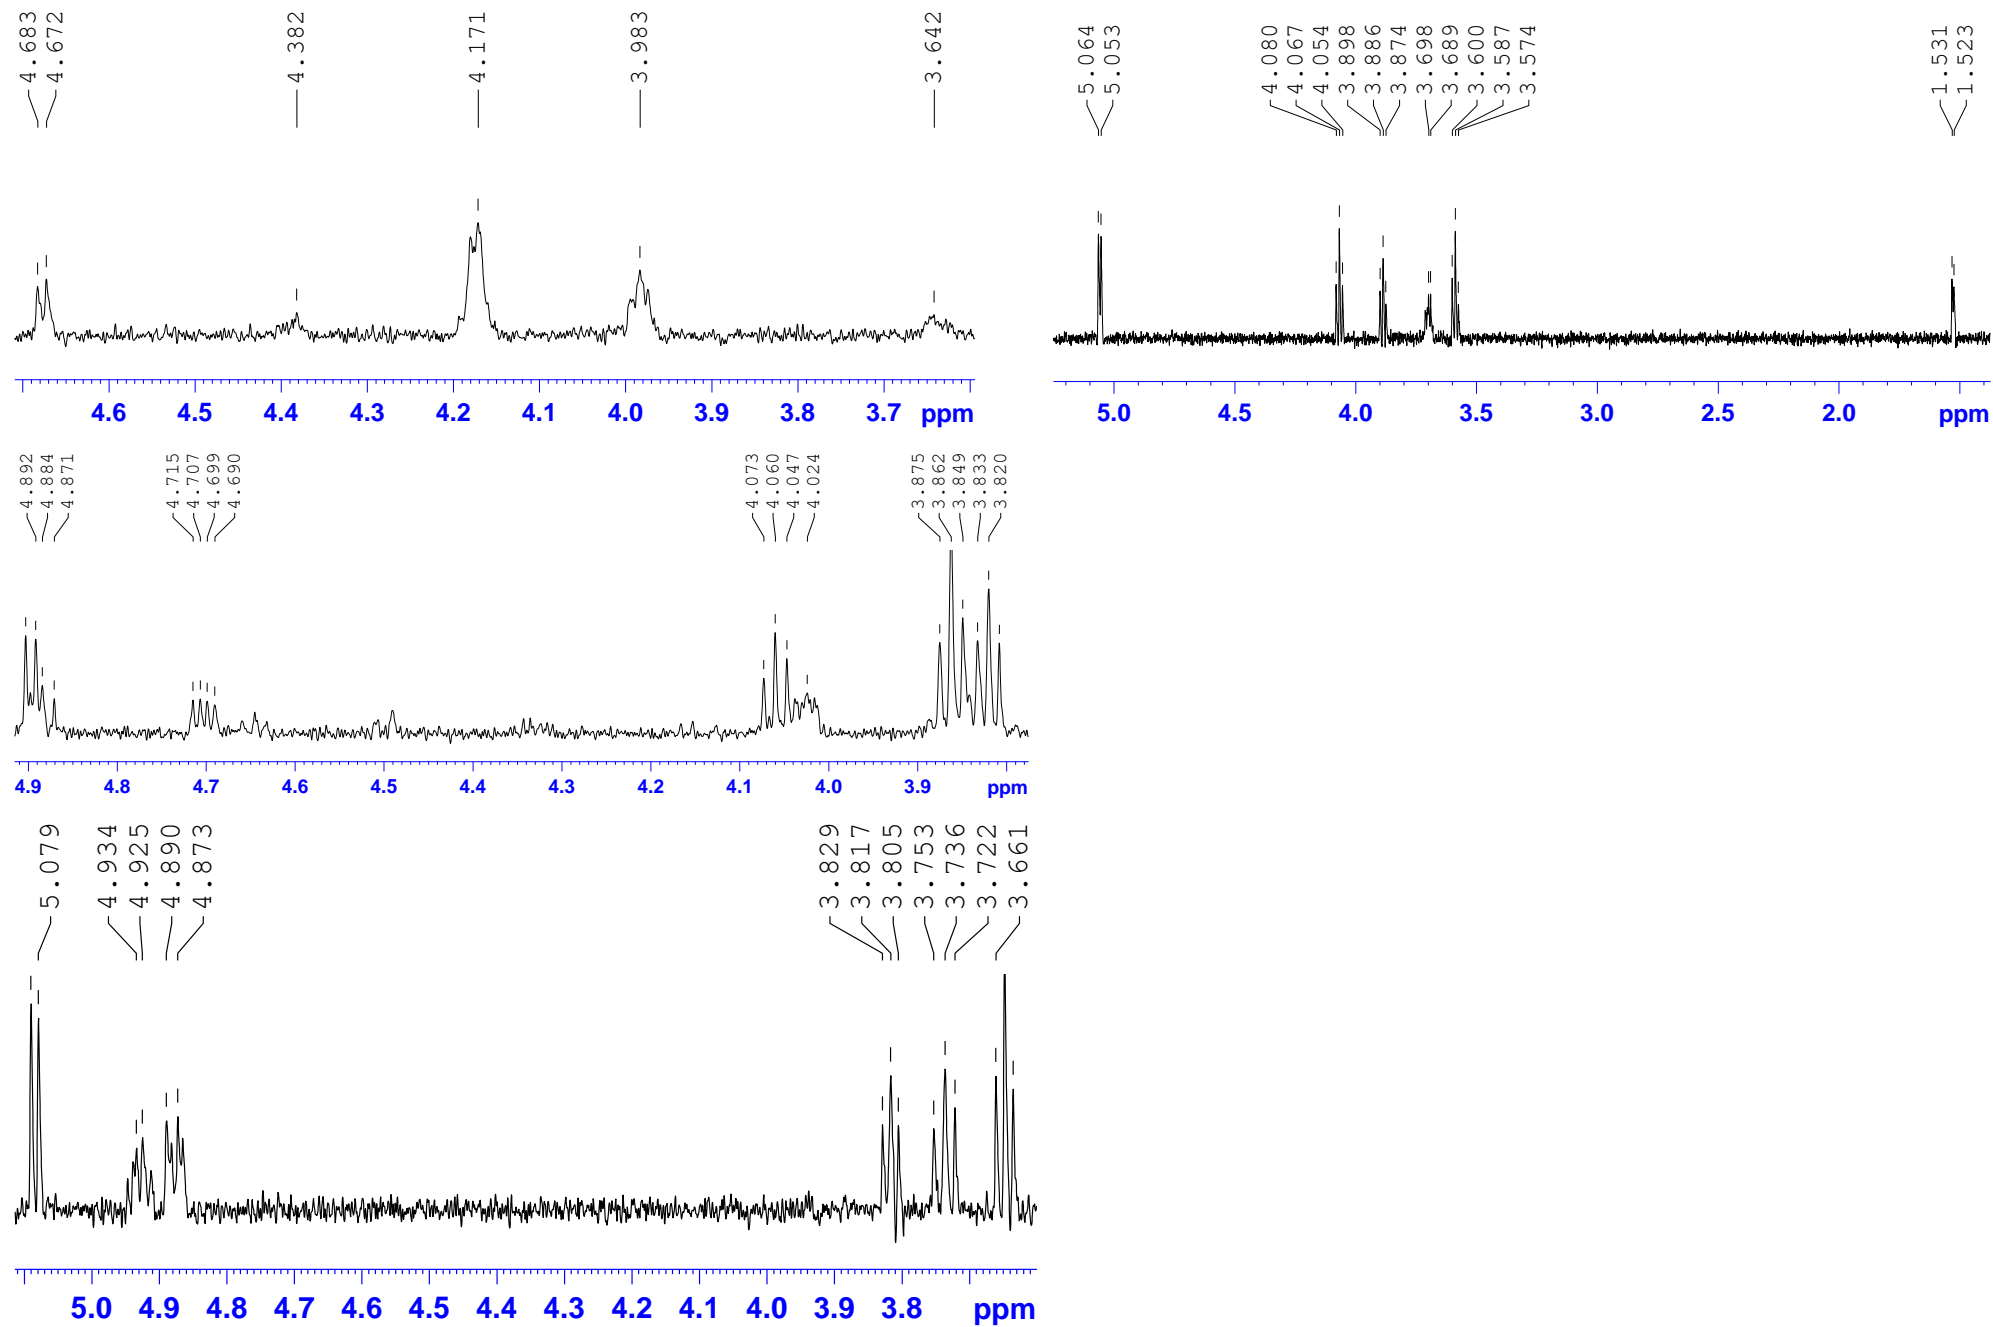

Figure S30. 1 D TOCSY (700.00 MHz) spectra of chitonoidoside C (**4**) in  $C_5D_5N/D_2O$  (4/1)

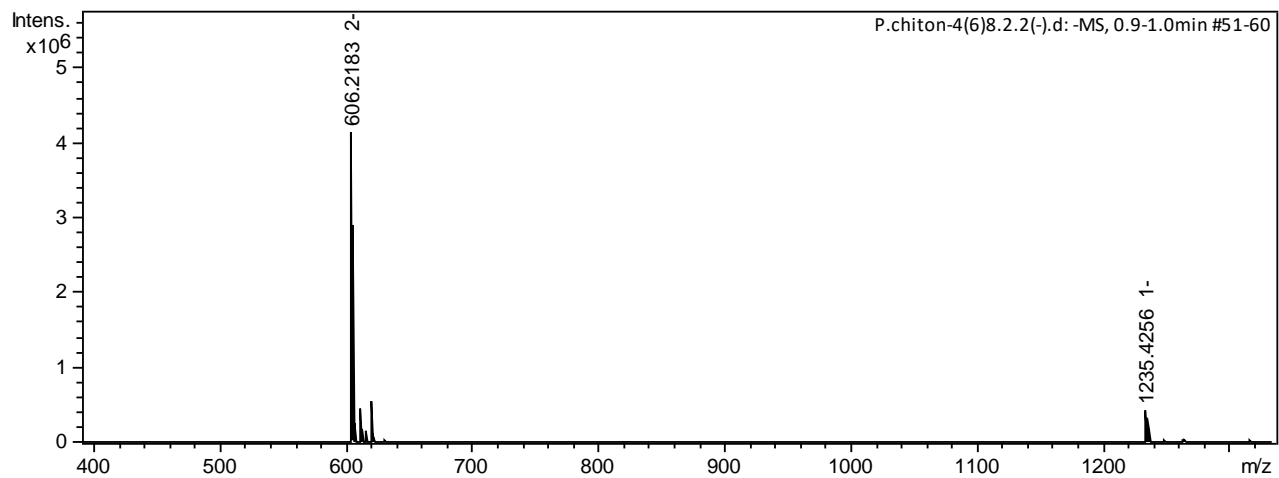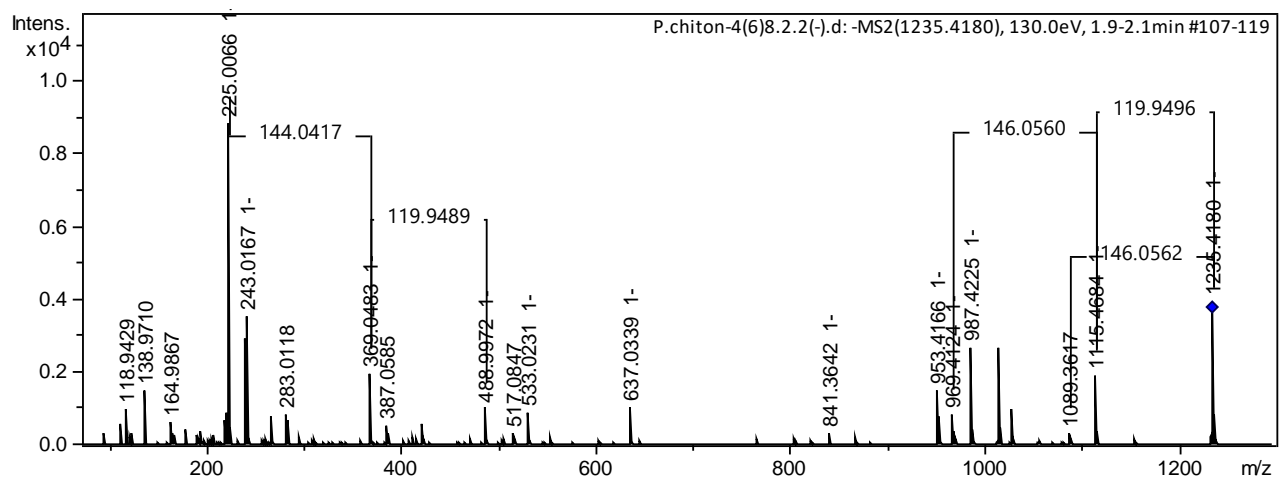

Figure S31. HR-ESI-MS and ESI-MS/MS spectra of chitonoidoside C (4)

**Table S4.** <sup>13</sup>C and <sup>1</sup>H NMR chemical shifts, HMBC and ROESY correlations of the aglycone moiety of chitonoidoside D (5).

| Position | $\delta_C$ mult. <sup>a</sup> | $\delta_H$ mult. (J in Hz) <sup>b</sup> | HMBC                      | ROESY                  |
|----------|-------------------------------|-----------------------------------------|---------------------------|------------------------|
| 1        | 36.1 CH <sub>2</sub>          | 1.73 m                                  |                           | H-11                   |
|          |                               | 1.31 m                                  |                           | H-11                   |
| 2        | 26.7 CH <sub>2</sub>          | 2.07 m                                  |                           |                        |
|          |                               | 1.86 m                                  |                           |                        |
| 3        | 88.8 CH                       | 3.13 dd (4.6; 11.7)                     | C: 4, 30, 31, C:1 Xyl1    | H-5, H-31, H1-Xyl1     |
| 4        | 39.5 C                        |                                         |                           |                        |
| 5        | 52.7 CH                       | 0.79 brd (11.7)                         | C: 6, 10, 30              | H-3, H-31              |
| 6        | 20.9 CH <sub>2</sub>          | 1.58 m                                  |                           | H-31                   |
|          |                               | 1.39 m                                  |                           |                        |
| 7        | 28.3 CH <sub>2</sub>          | 1.58 m                                  |                           |                        |
|          |                               | 1.17 m                                  |                           | H-32                   |
| 8        | 38.7 CH                       | 3.11 m                                  |                           | H-15, H-19             |
| 9        | 151.0 C                       |                                         |                           |                        |
| 10       | 39.7 C                        |                                         |                           |                        |
| 11       | 111.2 CH                      | 5.27 d (4.6)                            | C: 8, 13                  | H-1                    |
| 12       | 32.0 CH <sub>2</sub>          | 2.63 d (17.3)                           | C: 9, 13, 18              | H-17, H-32             |
|          |                               | 2.47 dd (6.5; 17.3)                     | C: 9, 11, 13, 14, 18      | H-21                   |
| 13       | 55.9 C                        |                                         |                           |                        |
| 14       | 42.0 C                        |                                         |                           |                        |
| 15       | 52.0 CH <sub>2</sub>          | 2.40 d (15.0)                           | C: 13, 16, 17, 32         | H-32                   |
|          |                               | 2.10 d (15.0)                           | C: 8, 14, 16, 32          | H-8                    |
| 16       | 214.7 C                       |                                         |                           |                        |
| 17       | 61.3 CH                       | 2.86 s                                  | C: 12, 13, 16, 18, 20, 21 | H-12, H-21, H-22, H-32 |
| 18       | 176.8 C                       |                                         |                           |                        |
| 19       | 21.9 CH <sub>3</sub>          | 1.26 s                                  | C: 1, 5, 9, 10            | H-1, H-2, H-8, H-30    |
| 20       | 83.7 C                        |                                         |                           |                        |
| 21       | 26.7 CH <sub>3</sub>          | 1.44 s                                  | C: 17, 20, 22             | H-12, H-17             |
| 22       | 38.2 CH <sub>2</sub>          | 1.71 m                                  | C: 20, 21, 23             |                        |
|          |                               | 1.54 m                                  | C: 20, 21                 |                        |
| 23       | 22.2 CH <sub>2</sub>          | 1.69 m                                  |                           |                        |
|          |                               | 1.44 m                                  |                           |                        |
| 24       | 37.8 CH <sub>2</sub>          | 1.88 m                                  | C: 23, 25, 26, 27         |                        |
| 25       | 145.6 C                       |                                         |                           |                        |
| 26       | 110.5 CH <sub>2</sub>         | 4.70 brs                                | C: 24, 27                 |                        |
|          |                               | 4.67 brs                                | C: 24, 27                 |                        |
| 27       | 22.1 CH <sub>3</sub>          | 1.62 s                                  | C: 24, 25, 26             |                        |
| 30       | 16.6 CH <sub>3</sub>          | 0.98 s                                  | C: 3, 4, 5, 31            | H-31                   |
| 31       | 28.0 CH <sub>3</sub>          | 1.14 s                                  | C: 3, 4, 5, 30            | H-3, H-5, H-30         |
| 32       | 20.6 CH <sub>3</sub>          | 0.88 s                                  | C: 8, 13, 14, 15          | H-7, H-12, H-17        |

<sup>a</sup>Recorded at 176.03 MHz in C<sub>5</sub>D<sub>5</sub>N/D<sub>2</sub>O (4/1). <sup>b</sup>Recorded at 700.00 MHz in C<sub>5</sub>D<sub>5</sub>N/D<sub>2</sub>O (4/1).

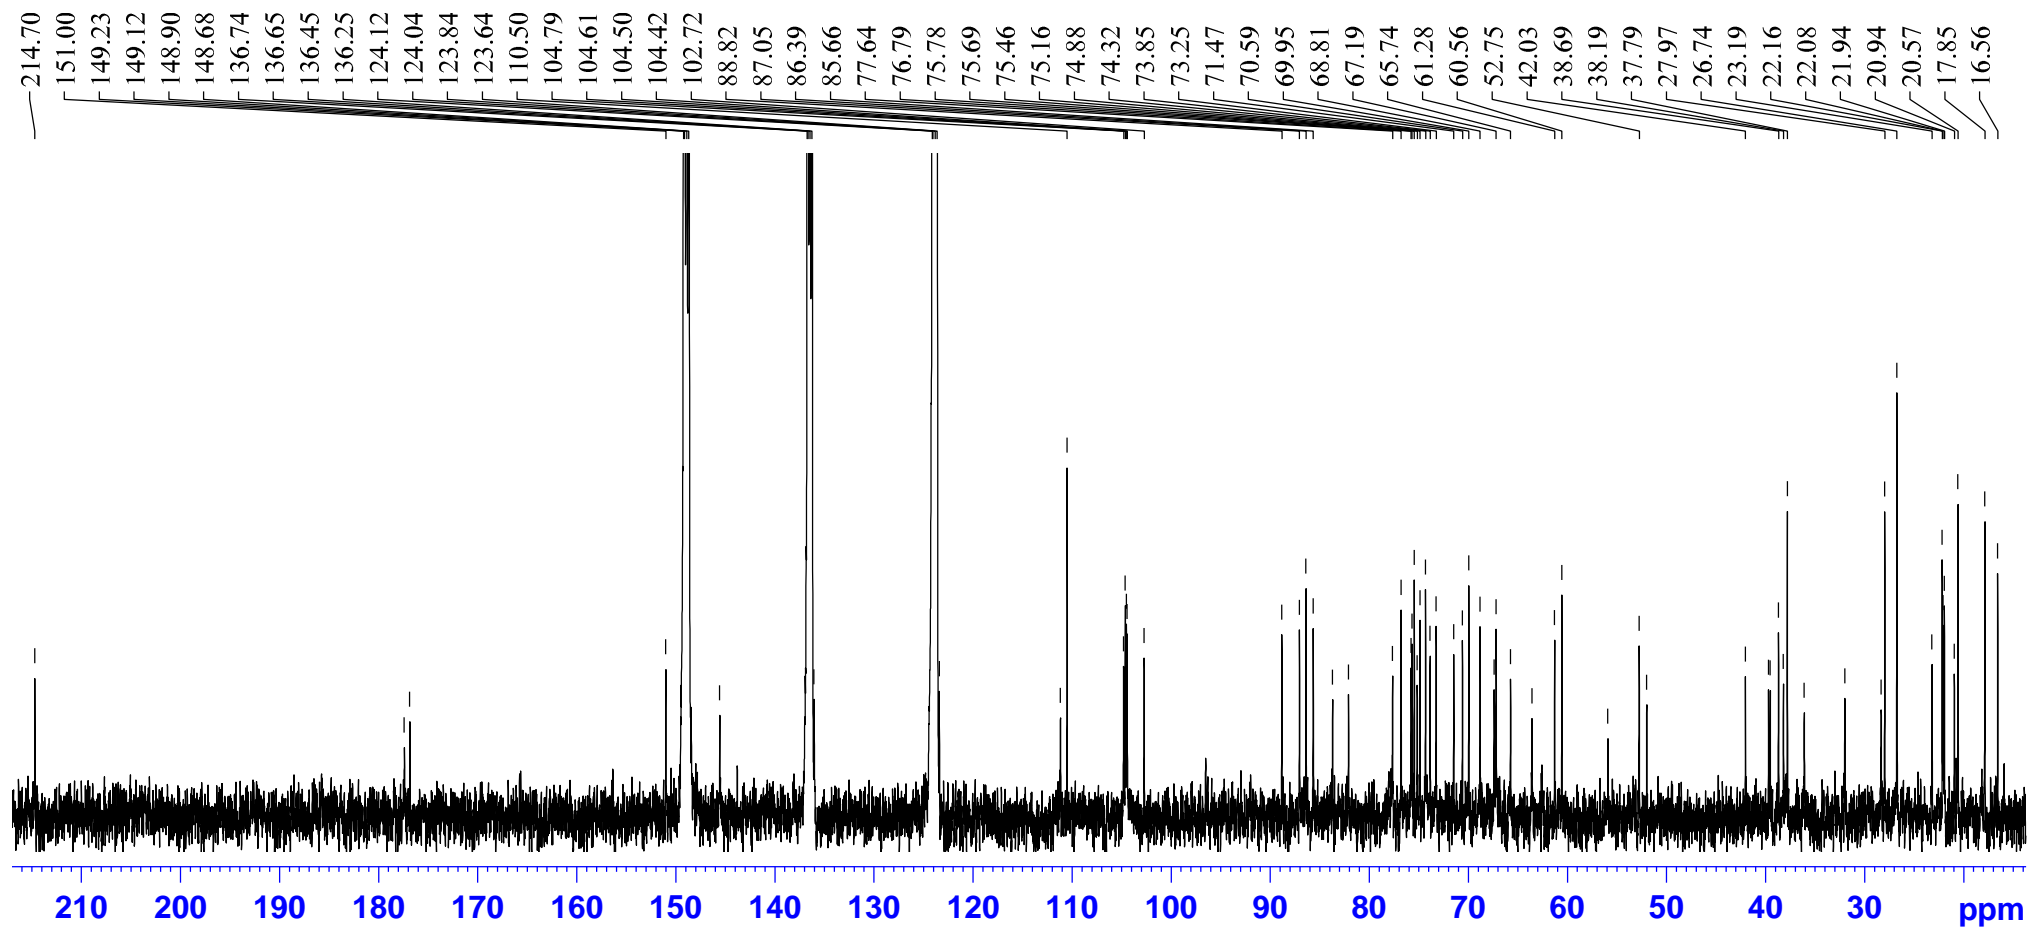

Figure S32. The  $^{13}\text{C}$  NMR (176.03 MHz) spectrum of chitonoidoside D (**5**) in  $\text{C}_5\text{D}_5\text{N}/\text{D}_2\text{O}$  (4/1)

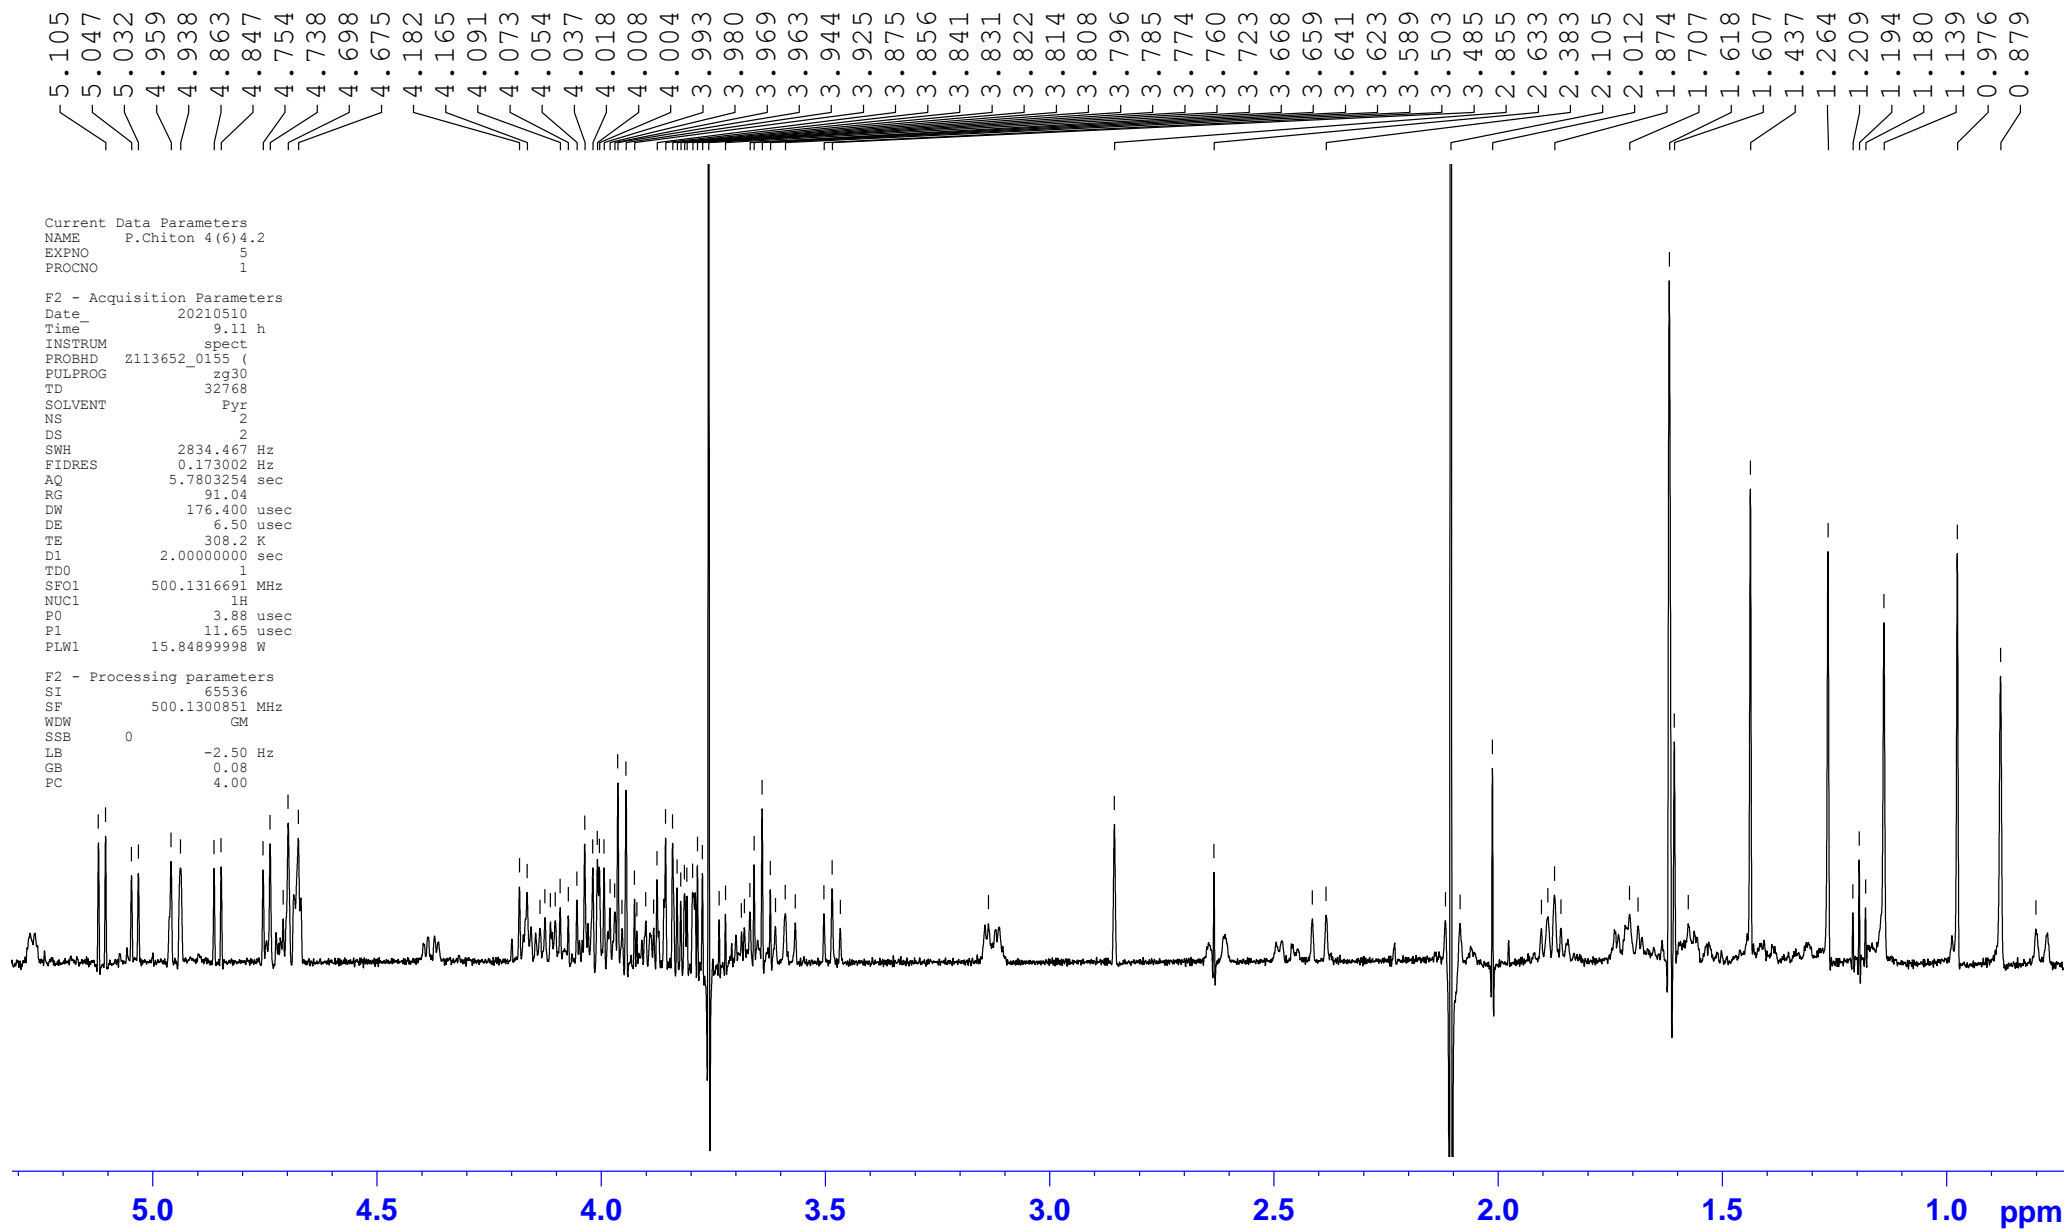

Figure S33. The  $^1\text{H}$  NMR (700.00 MHz) spectrum of chitonoidoside D (5) in  $\text{C}_5\text{D}_5\text{N}/\text{D}_2\text{O}$  (4/1)



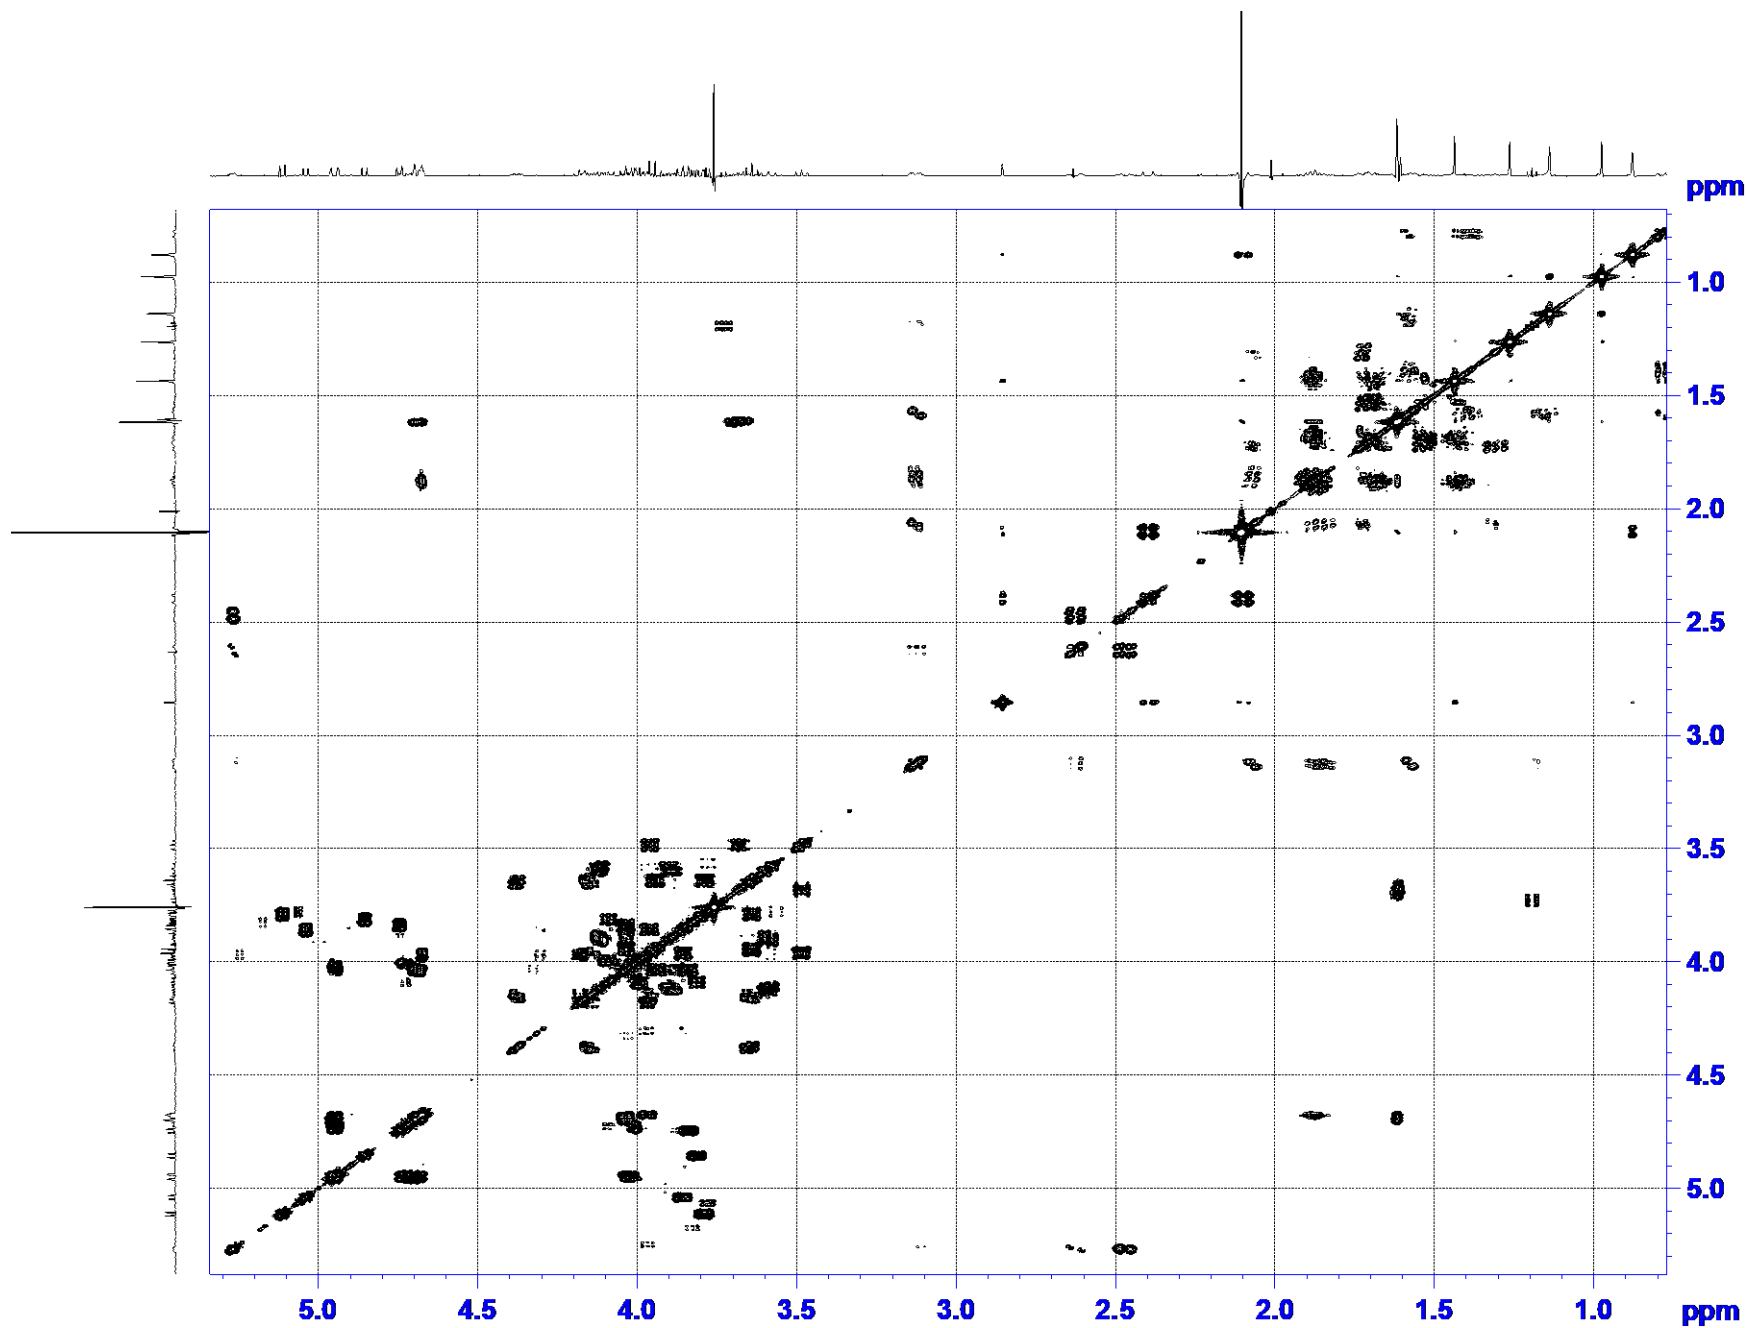

Figure S34. The COSY (700.00 MHz) spectrum of chitonoidoside D (5) in C<sub>5</sub>D<sub>5</sub>N/D<sub>2</sub>O (4/1)

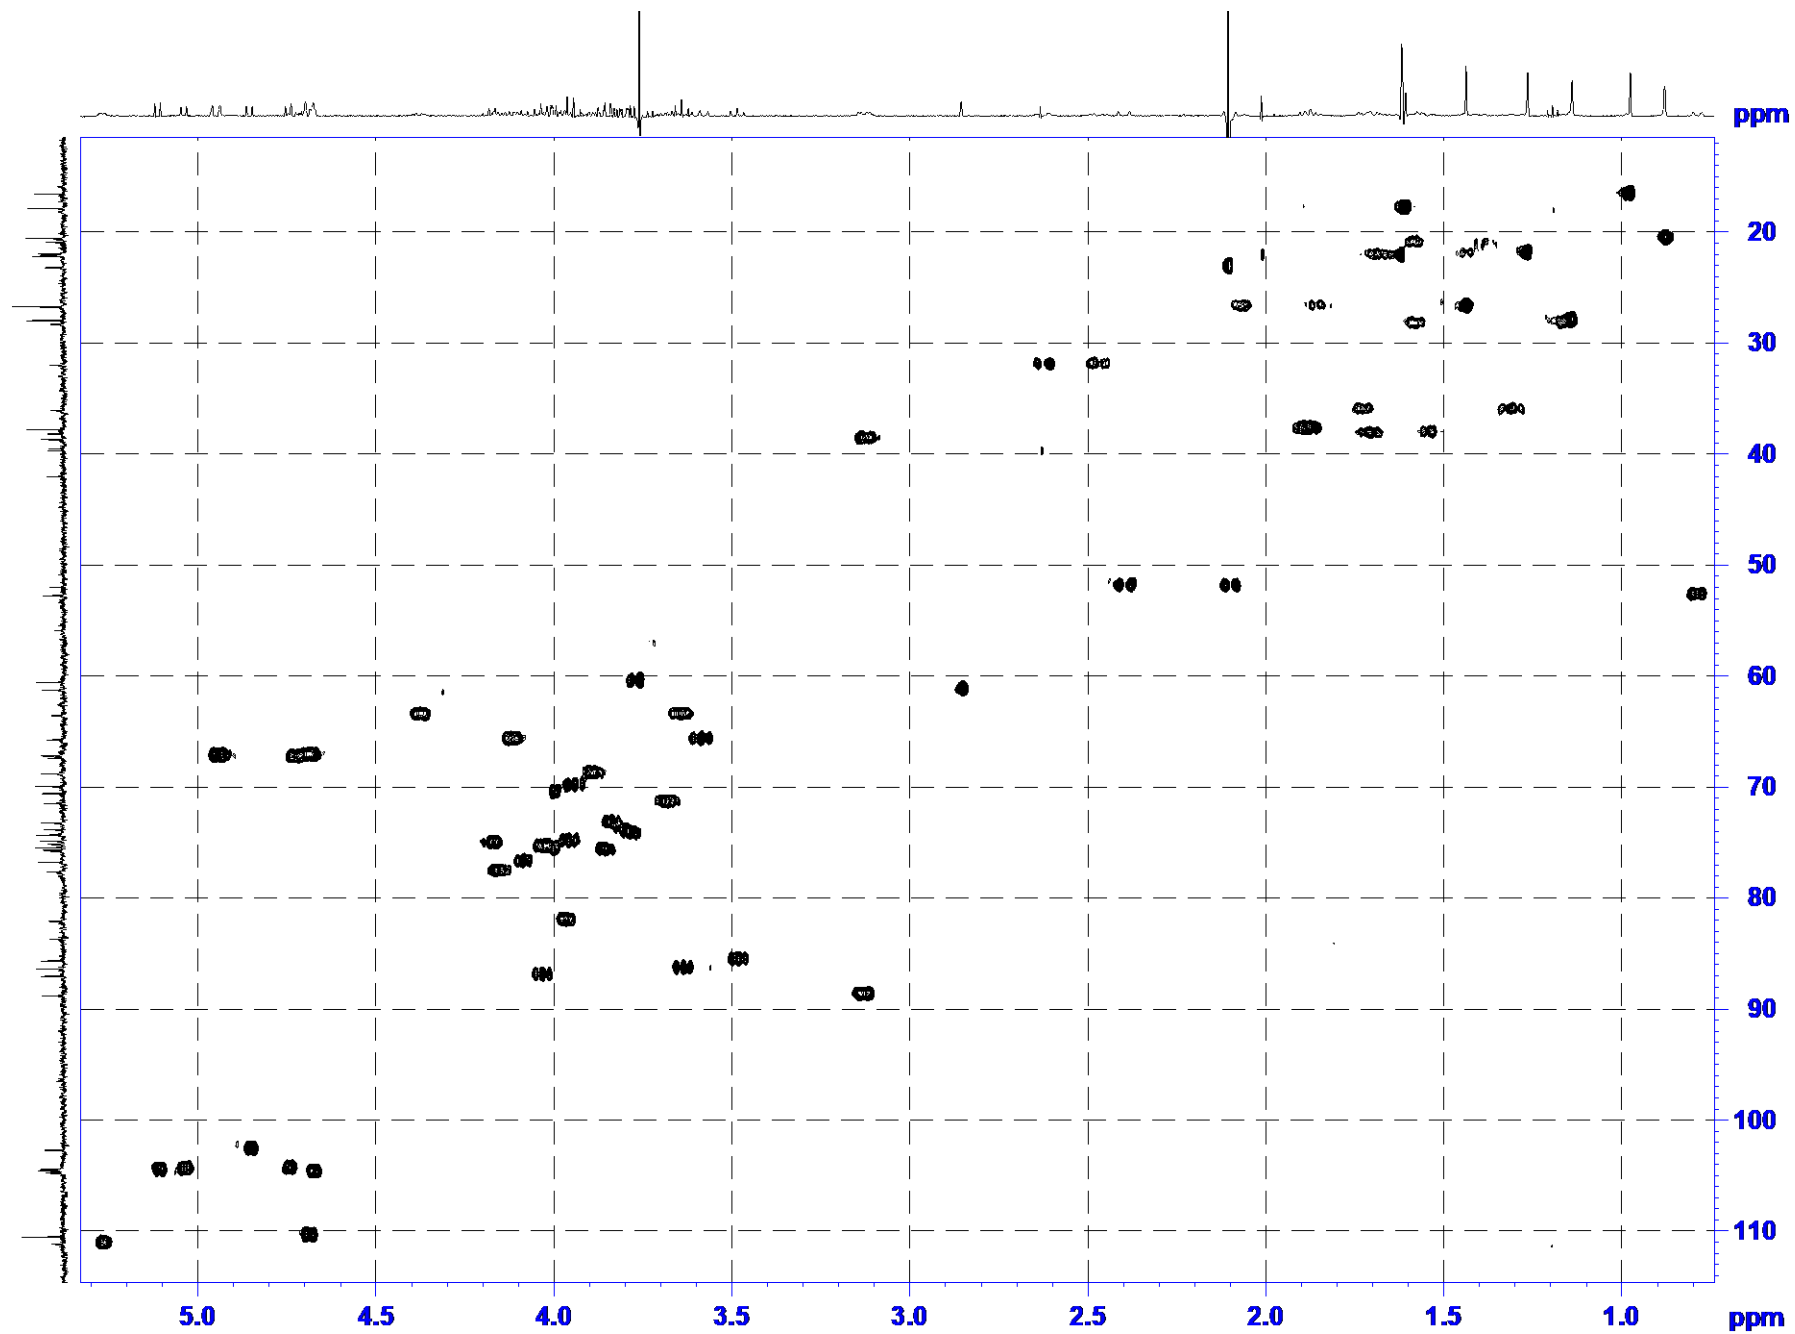

Figure S35. The HSQC (700.00 MHz) spectrum of chitonoidoside D (5) in  $\text{C}_5\text{D}_5\text{N}/\text{D}_2\text{O}$  (4/1)

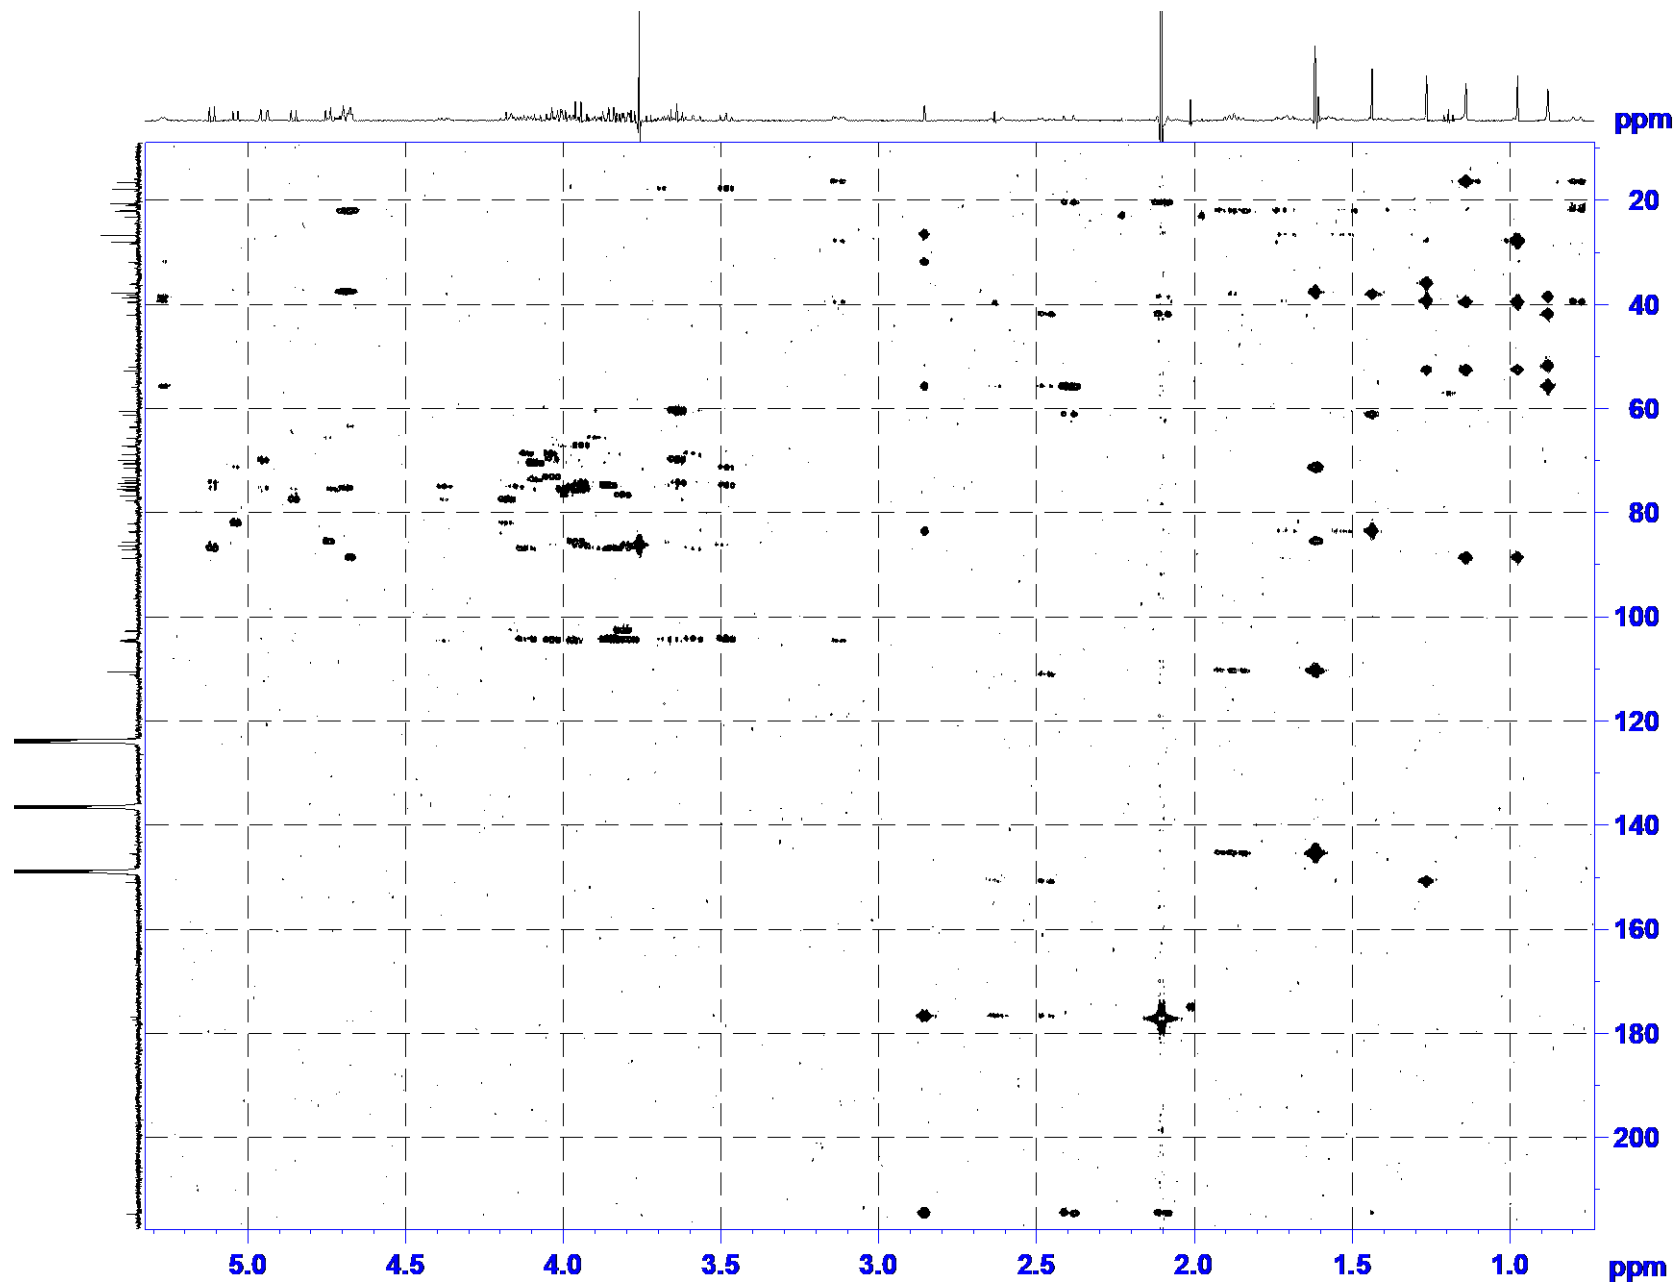

Figure S36. The HMBC (700.00 MHz) spectrum of chitonoidoside D (5) in  $\text{C}_5\text{D}_5\text{N}/\text{D}_2\text{O}$  (4/1)

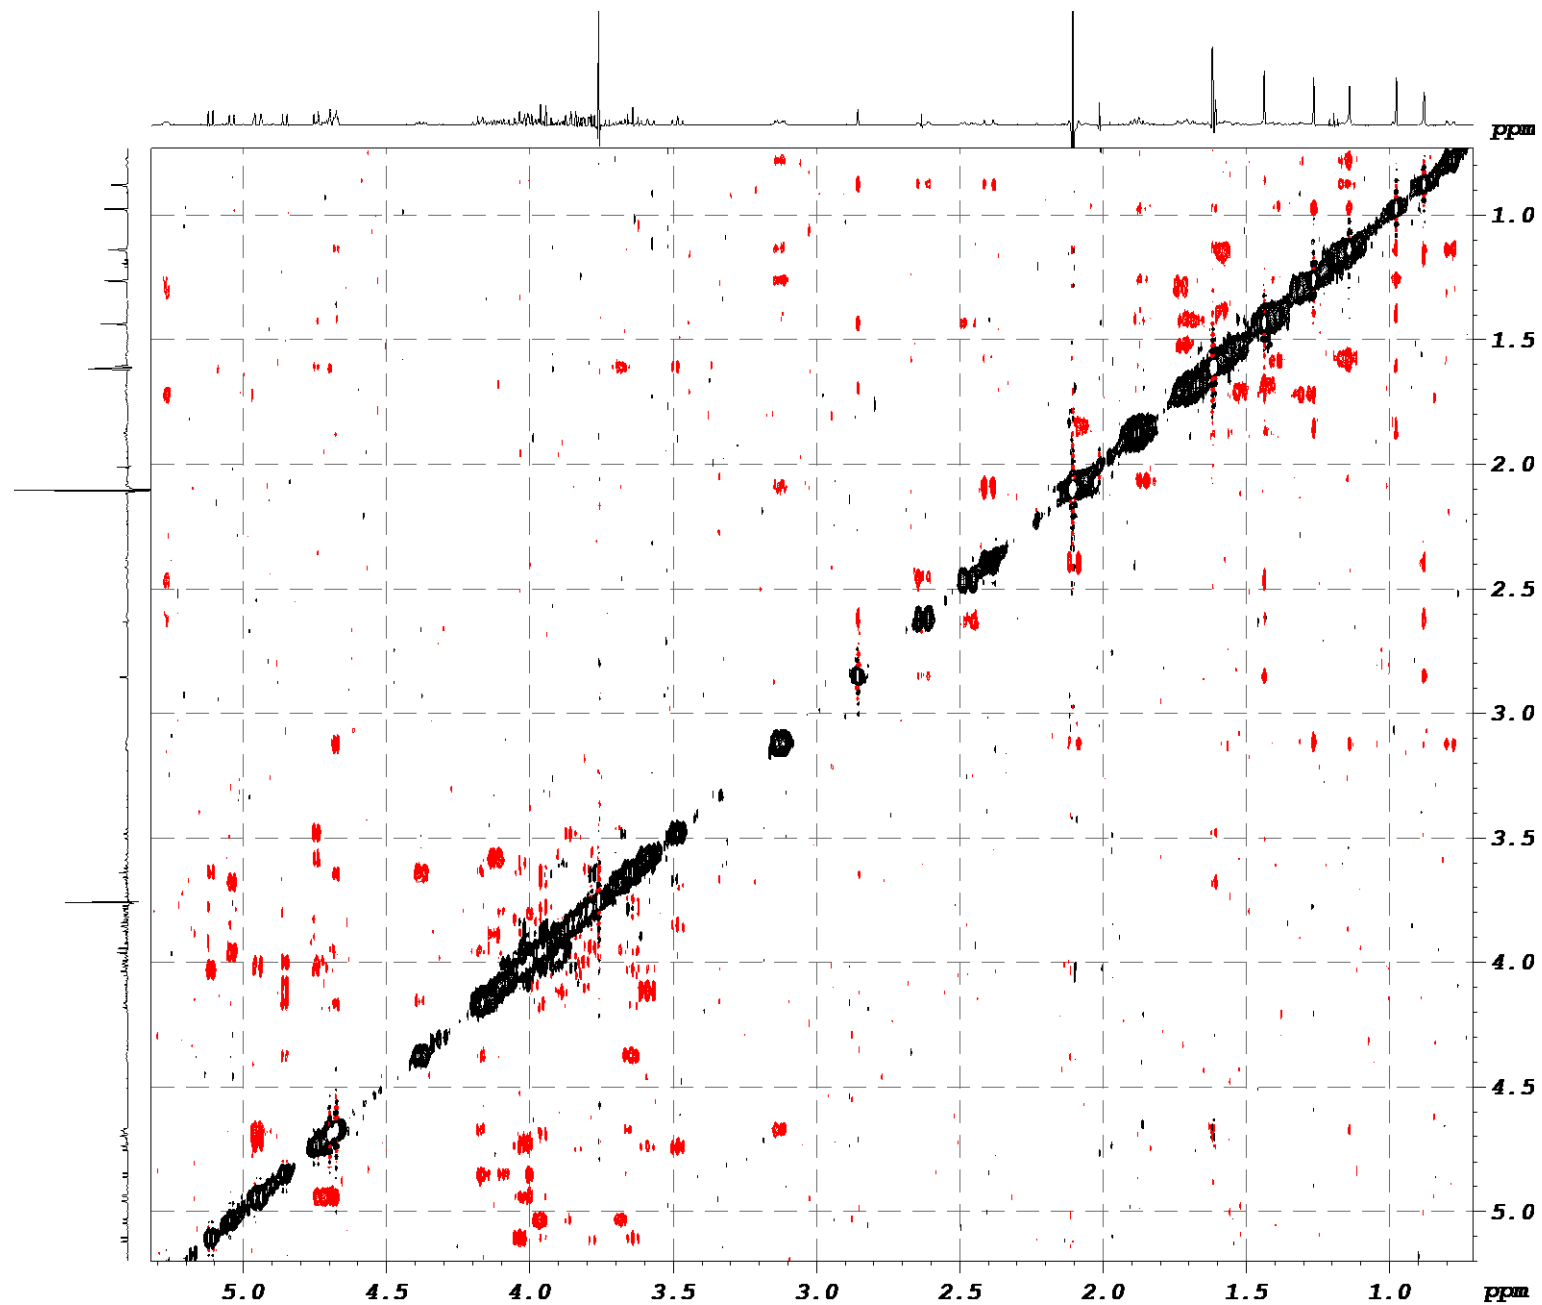

Figure S37. The ROESY (700.00 MHz) spectrum of chitonoidoside D (5) in C<sub>5</sub>D<sub>5</sub>N/D<sub>2</sub>O (4/1)

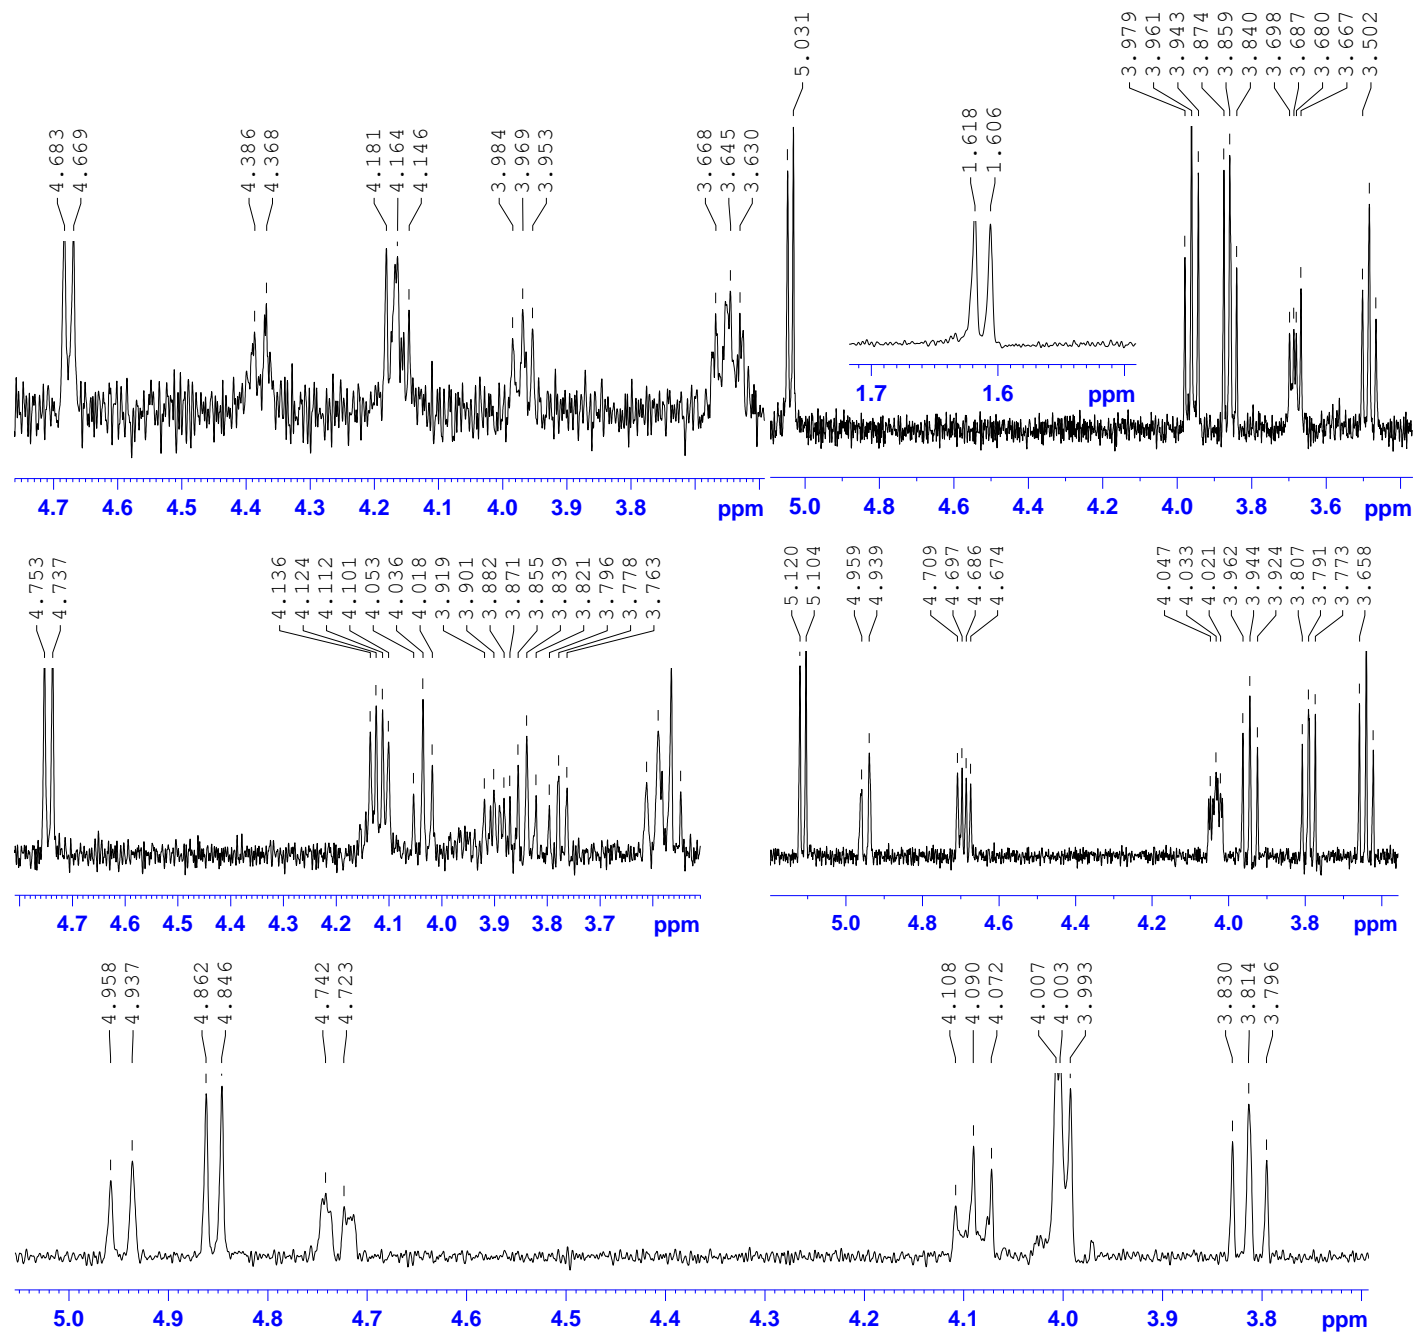

Figure S38. 1D TOCSY (700.00 MHz) spectra of chitonoidoside D (5) in  $C_5D_5N/D_2O$  (4/1)

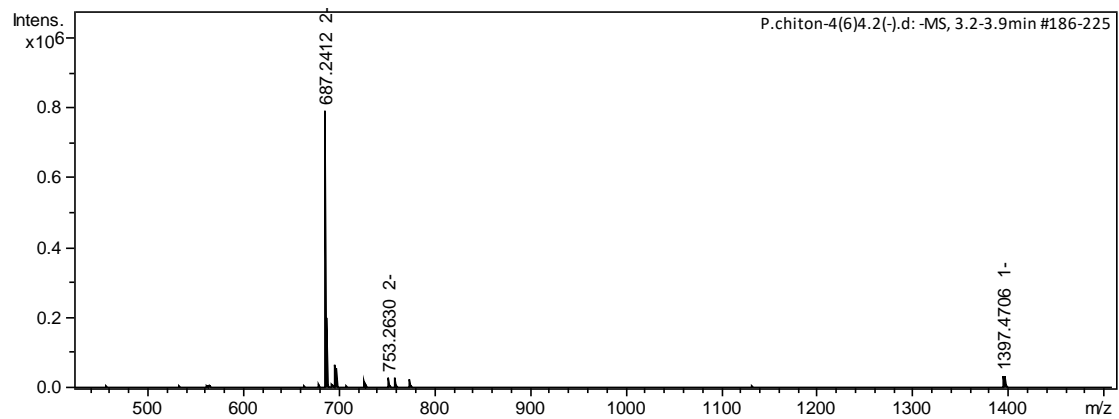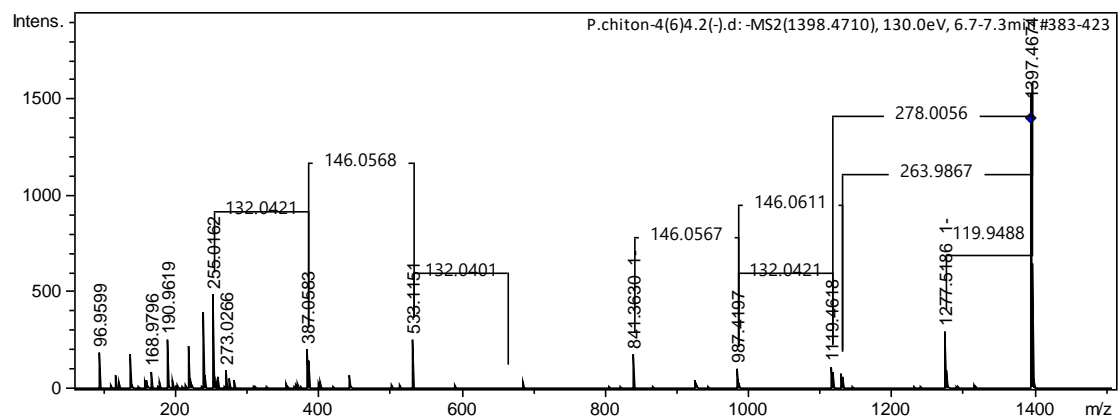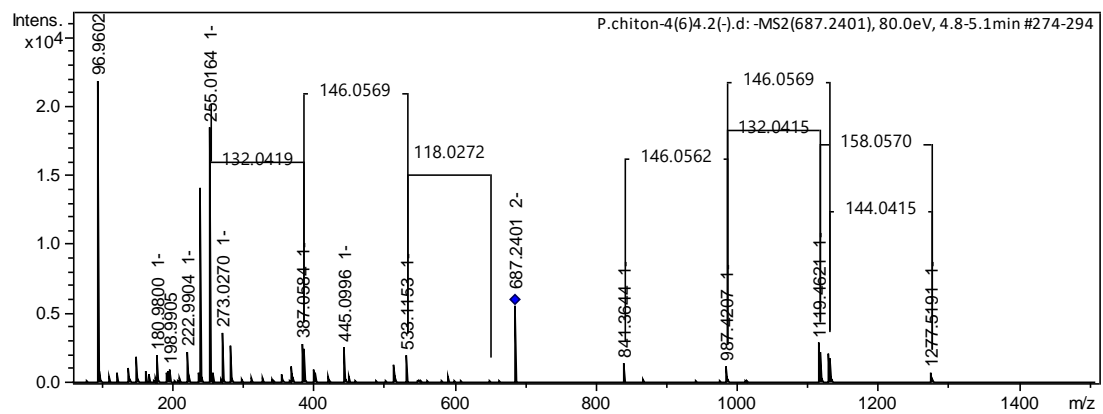

Figure S39. HR-ESI-MS and ESI-MS/MS spectra of chitonoidoside D (5)

**Table S5.** <sup>13</sup>C and <sup>1</sup>H NMR chemical shifts, HMBC and ROESY correlations of the aglycone moiety of chitonoidoside E (6).

| Position | $\delta_C$ mult. <sup>a</sup> | $\delta_H$ mult. (J in Hz) <sup>b</sup> | HMBC                           | ROESY                         |
|----------|-------------------------------|-----------------------------------------|--------------------------------|-------------------------------|
| 1        | 35.9 CH <sub>2</sub>          | 1.60 m<br>1.28 m                        |                                | H-11                          |
| 2        | 26.7 CH <sub>2</sub>          | 2.08 m<br>1.84 m                        |                                |                               |
| 3        | 88.7 CH                       | 3.12 dd (4.2; 11.2)                     | C: 30, C:1 Xyl1                | H-5, H-31, H1-Xyl1            |
| 4        | 39.6 C                        |                                         |                                |                               |
| 5        | 52.7 CH                       | 0.75 brd (11.2)                         | C: 10, 19, 30                  | H-1, H-3, H-31                |
| 6        | 20.9 CH <sub>2</sub>          | 1.57 m<br>1.34 m                        |                                | H-19, H-30                    |
| 7        | 28.7 CH <sub>2</sub>          | 1.57 m<br>1.08 m                        |                                | H-5, H-32                     |
| 8        | 40.9 CH                       | 2.31 m                                  |                                | H-18, H-19                    |
| 9        | 150.9 C                       |                                         |                                |                               |
| 10       | 39.5 C                        |                                         |                                |                               |
| 11       | 114.7 CH                      | 5.29 d (6.1)                            | C: 8, 10, 13                   | H-1                           |
| 12       | 33.8 CH <sub>2</sub>          | 2.38 m<br>2.25 m                        | C: 9, 11, 13, 14               | H-32<br>H-21                  |
| 13       | 56.3 C                        |                                         |                                |                               |
| 14       | 40.3 C                        |                                         |                                |                               |
| 15       | 50.5 CH <sub>2</sub>          | 2.46 d (15.5)<br>2.19 d (15.5)          | C: 14, 16, 32<br>C: 13, 16, 32 | H-8, H-18<br>H-32             |
| 16       | 218.1 C                       |                                         |                                |                               |
| 17       | 63.8 CH                       | 2.35 s                                  | C: 12, 13, 16, 18, 20, 21      | H-21, H-22, H-32              |
| 18       | 73.8 CH <sub>2</sub>          | 4.02 m<br>3.65 d (9.4)                  | C: 12, 14, 20<br>C: 12, 14, 20 | H-8, H-15<br>H-21             |
| 19       | 22.2 CH <sub>3</sub>          | 0.98 s                                  | C: 1, 5, 9, 10                 | H-1, H-2, H-6, H-8, H-18      |
| 20       | 86.8 C                        |                                         |                                |                               |
| 21       | 26.1 CH <sub>3</sub>          | 1.31 s                                  | C: 17, 20, 22                  | H-12, H-17, H-18, H-22        |
| 22       | 37.8 CH <sub>2</sub>          | 1.70 m<br>1.56 m                        |                                | H-21<br>H-21                  |
| 23       | 22.7 CH <sub>2</sub>          | 1.69 m<br>1.56 m                        |                                |                               |
| 24       | 38.2 CH <sub>2</sub>          | 1.95 m                                  | C: 25                          |                               |
| 25       | 146.0 C                       |                                         |                                |                               |
| 26       | 110.2 CH <sub>2</sub>         | 4.72 brs<br>4.71 brs                    | C: 22, 27<br>C: 22, 27         | H-27<br>H-27                  |
| 27       | 22.2 CH <sub>3</sub>          | 1.65 s                                  | C: 24, 25, 26                  | H-26                          |
| 30       | 16.5 CH <sub>3</sub>          | 0.97 s                                  | C: 3, 4, 5, 31                 | H-2, H-6, H-31                |
| 31       | 27.9 CH <sub>3</sub>          | 1.13 s                                  | C: 3, 4, 5, 30                 | H-3, H-5, H-6, H-30, H-1 Xyl1 |
| 32       | 21.4 CH <sub>3</sub>          | 0.78 s                                  | C: 8, 13, 14, 15               | H-7, H-15, H-17               |

<sup>a</sup>Recorded at 176.03 MHz in C<sub>5</sub>D<sub>5</sub>N/D<sub>2</sub>O (4/1). <sup>b</sup>Recorded at 700.00 MHz in C<sub>5</sub>D<sub>5</sub>N/D<sub>2</sub>O (4/1).

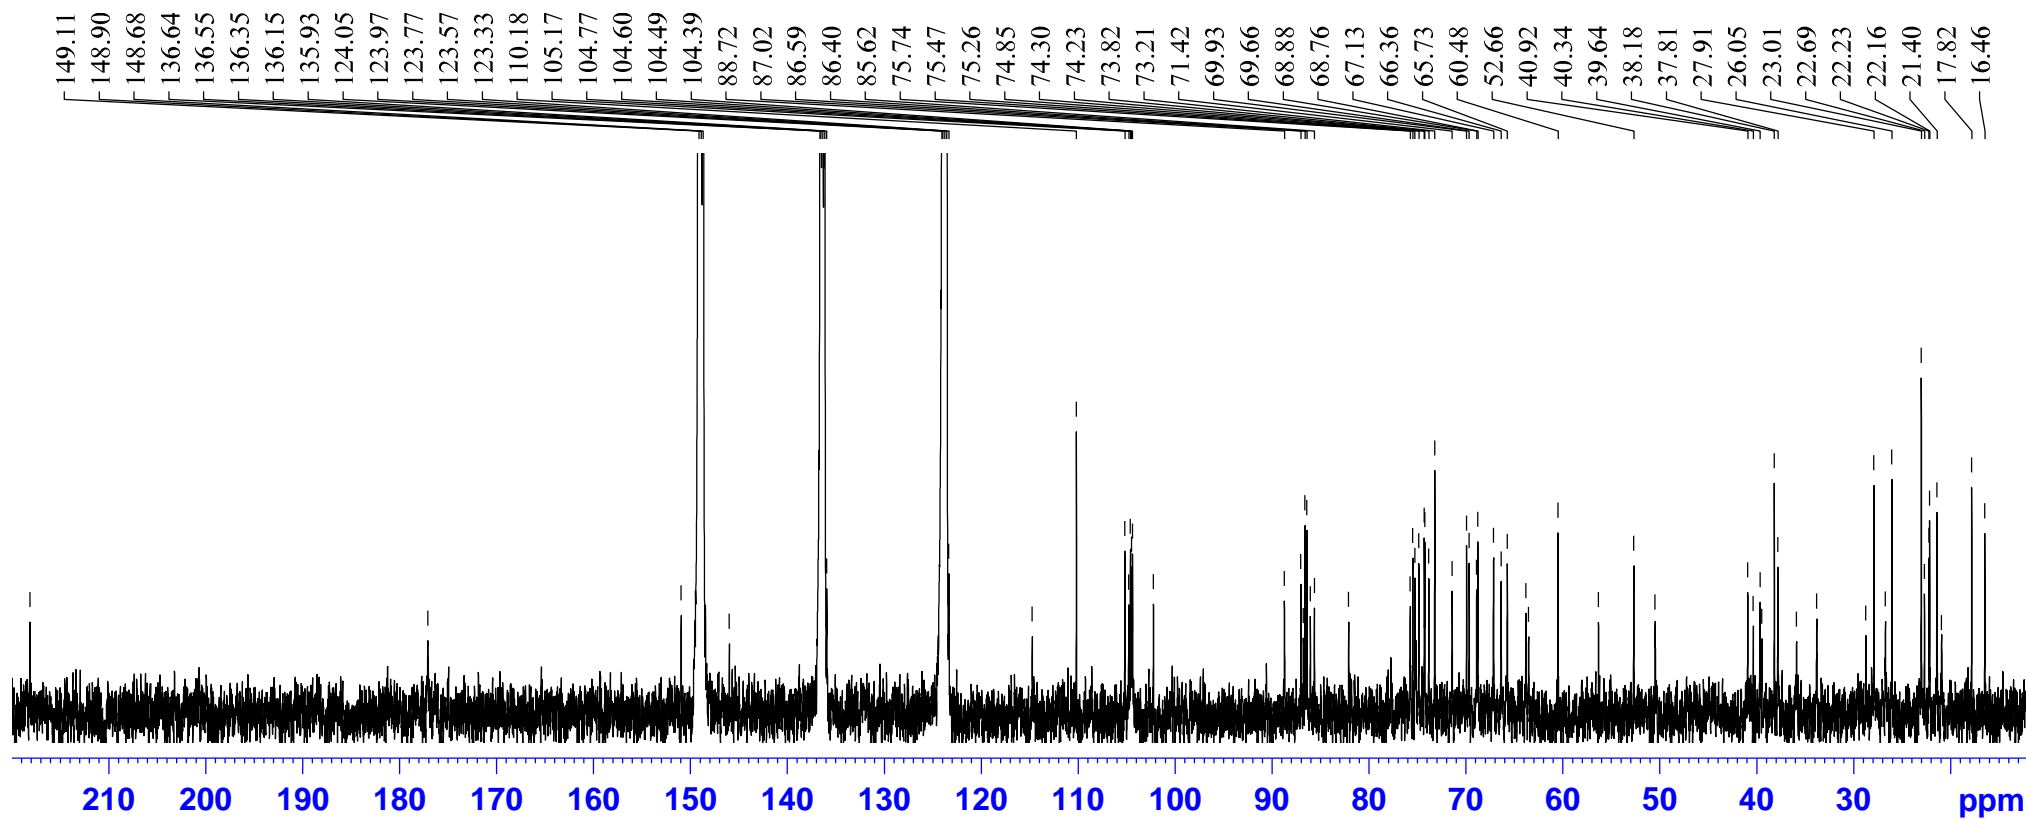

Figure S40. The  $^{13}\text{C}$  NMR (176.03 MHz) spectrum of chitonoidoside E (**6**) in  $\text{C}_5\text{D}_5\text{N}/\text{D}_2\text{O}$  (4/1)



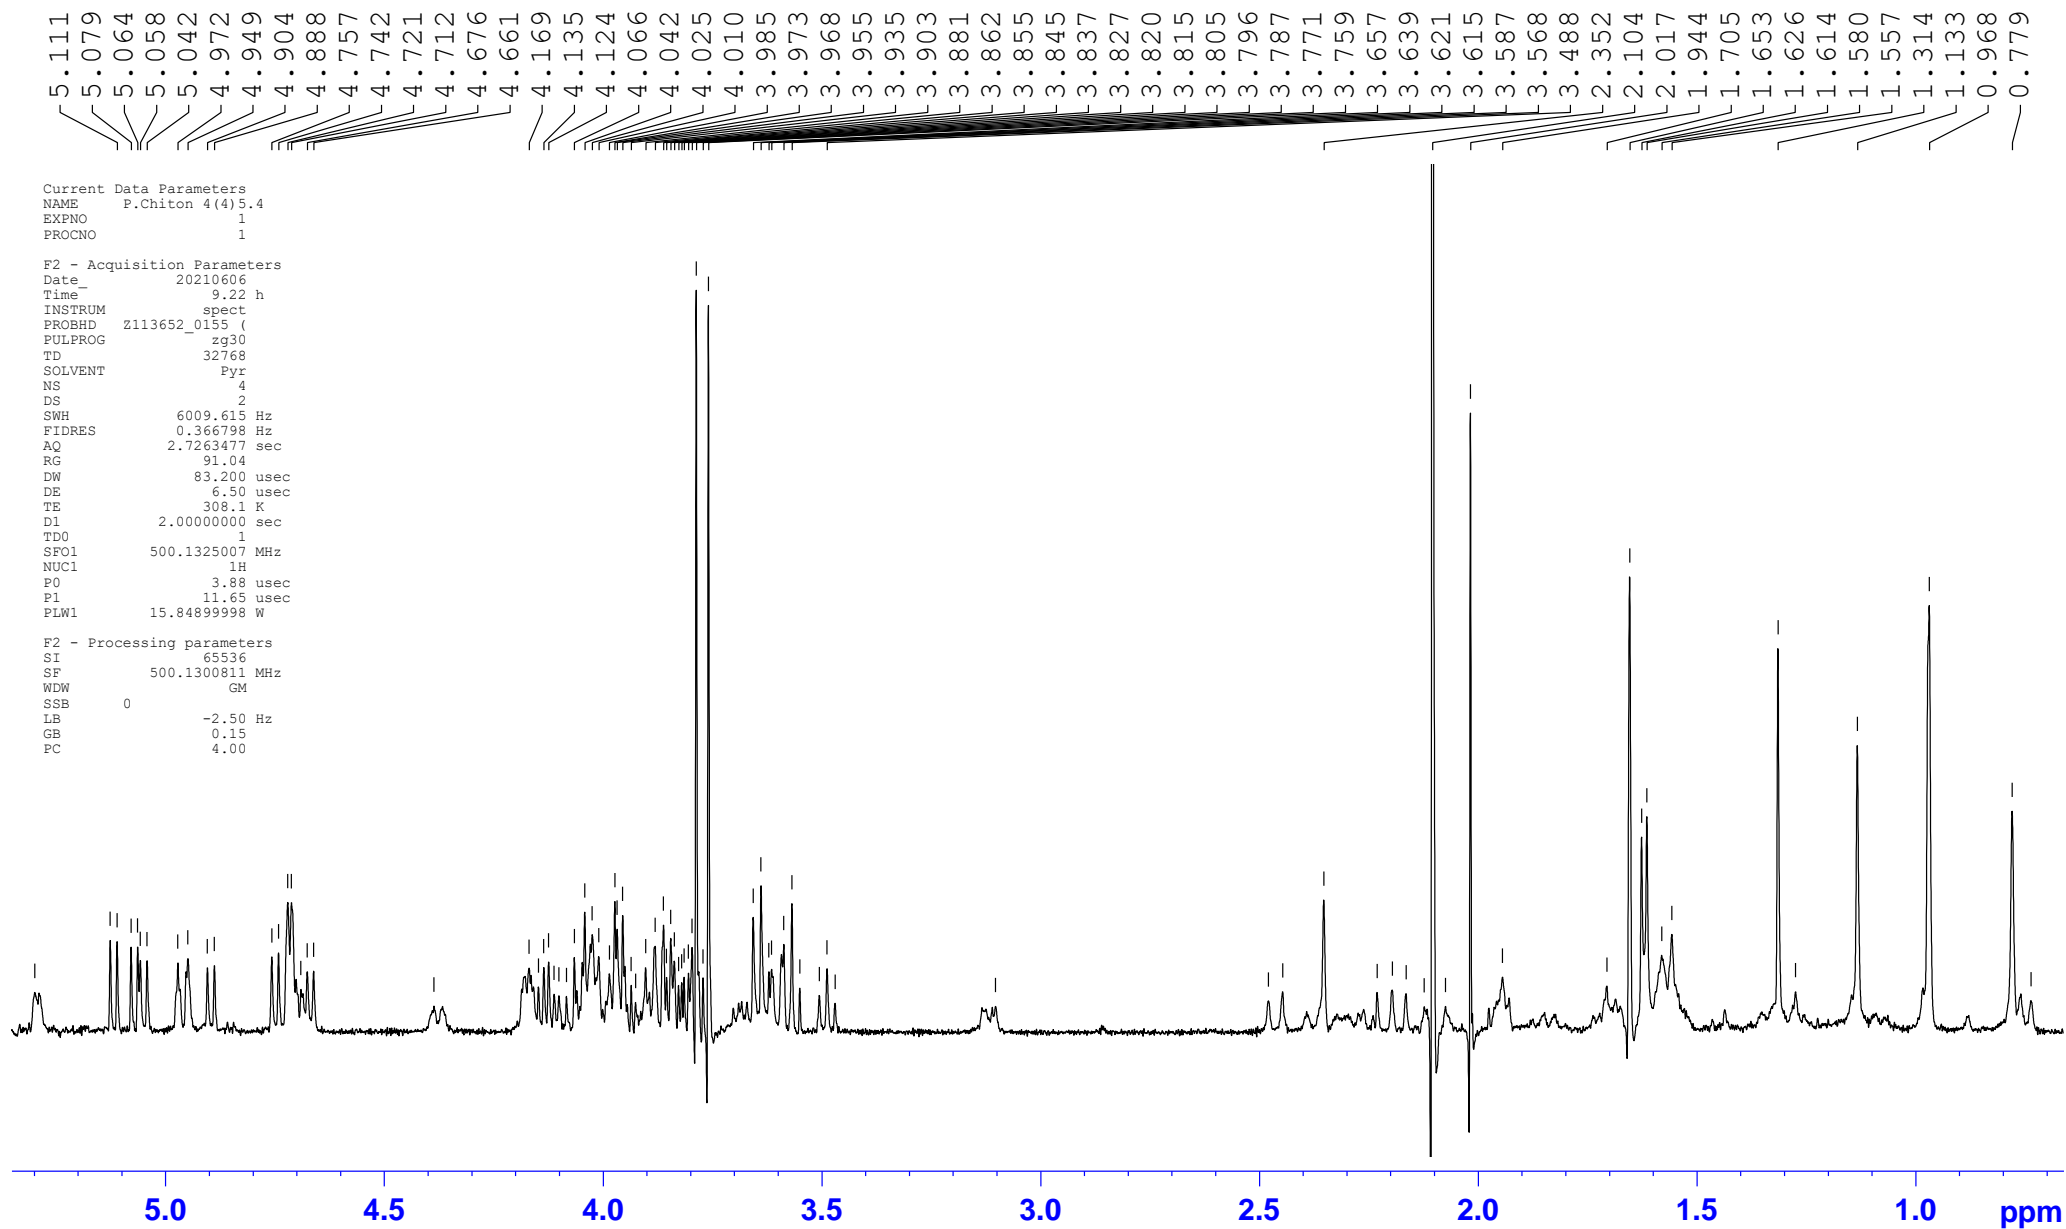

Figure S41. The  $^1\text{H}$  NMR (700.00 MHz) spectrum of chitonoidoside F (**6**) in  $\text{C}_5\text{D}_5\text{N}/\text{D}_2\text{O}$  (4/1)

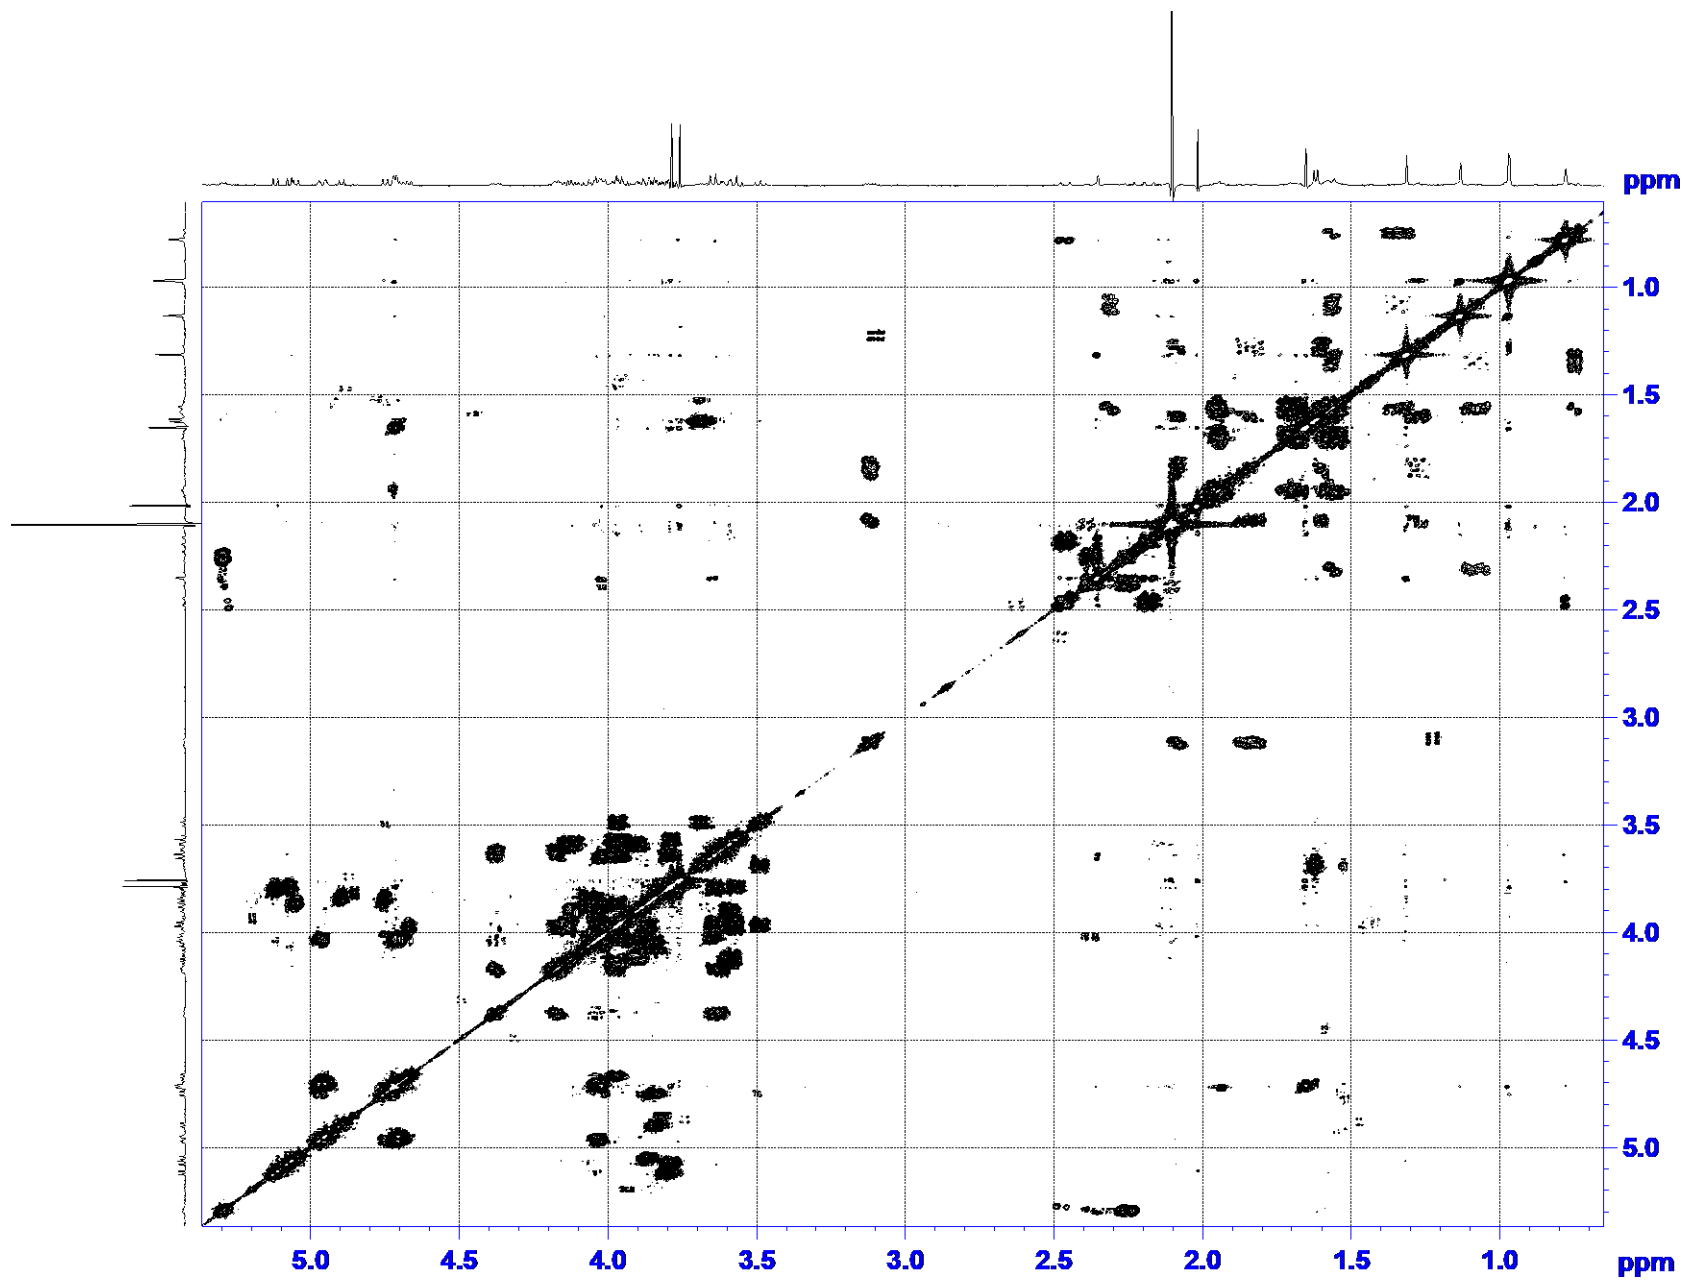

Figure S42. The COSY (700.00 MHz) spectrum of chitonoidoside E (**6**) in C<sub>5</sub>D<sub>5</sub>N/D<sub>2</sub>O (4/1)

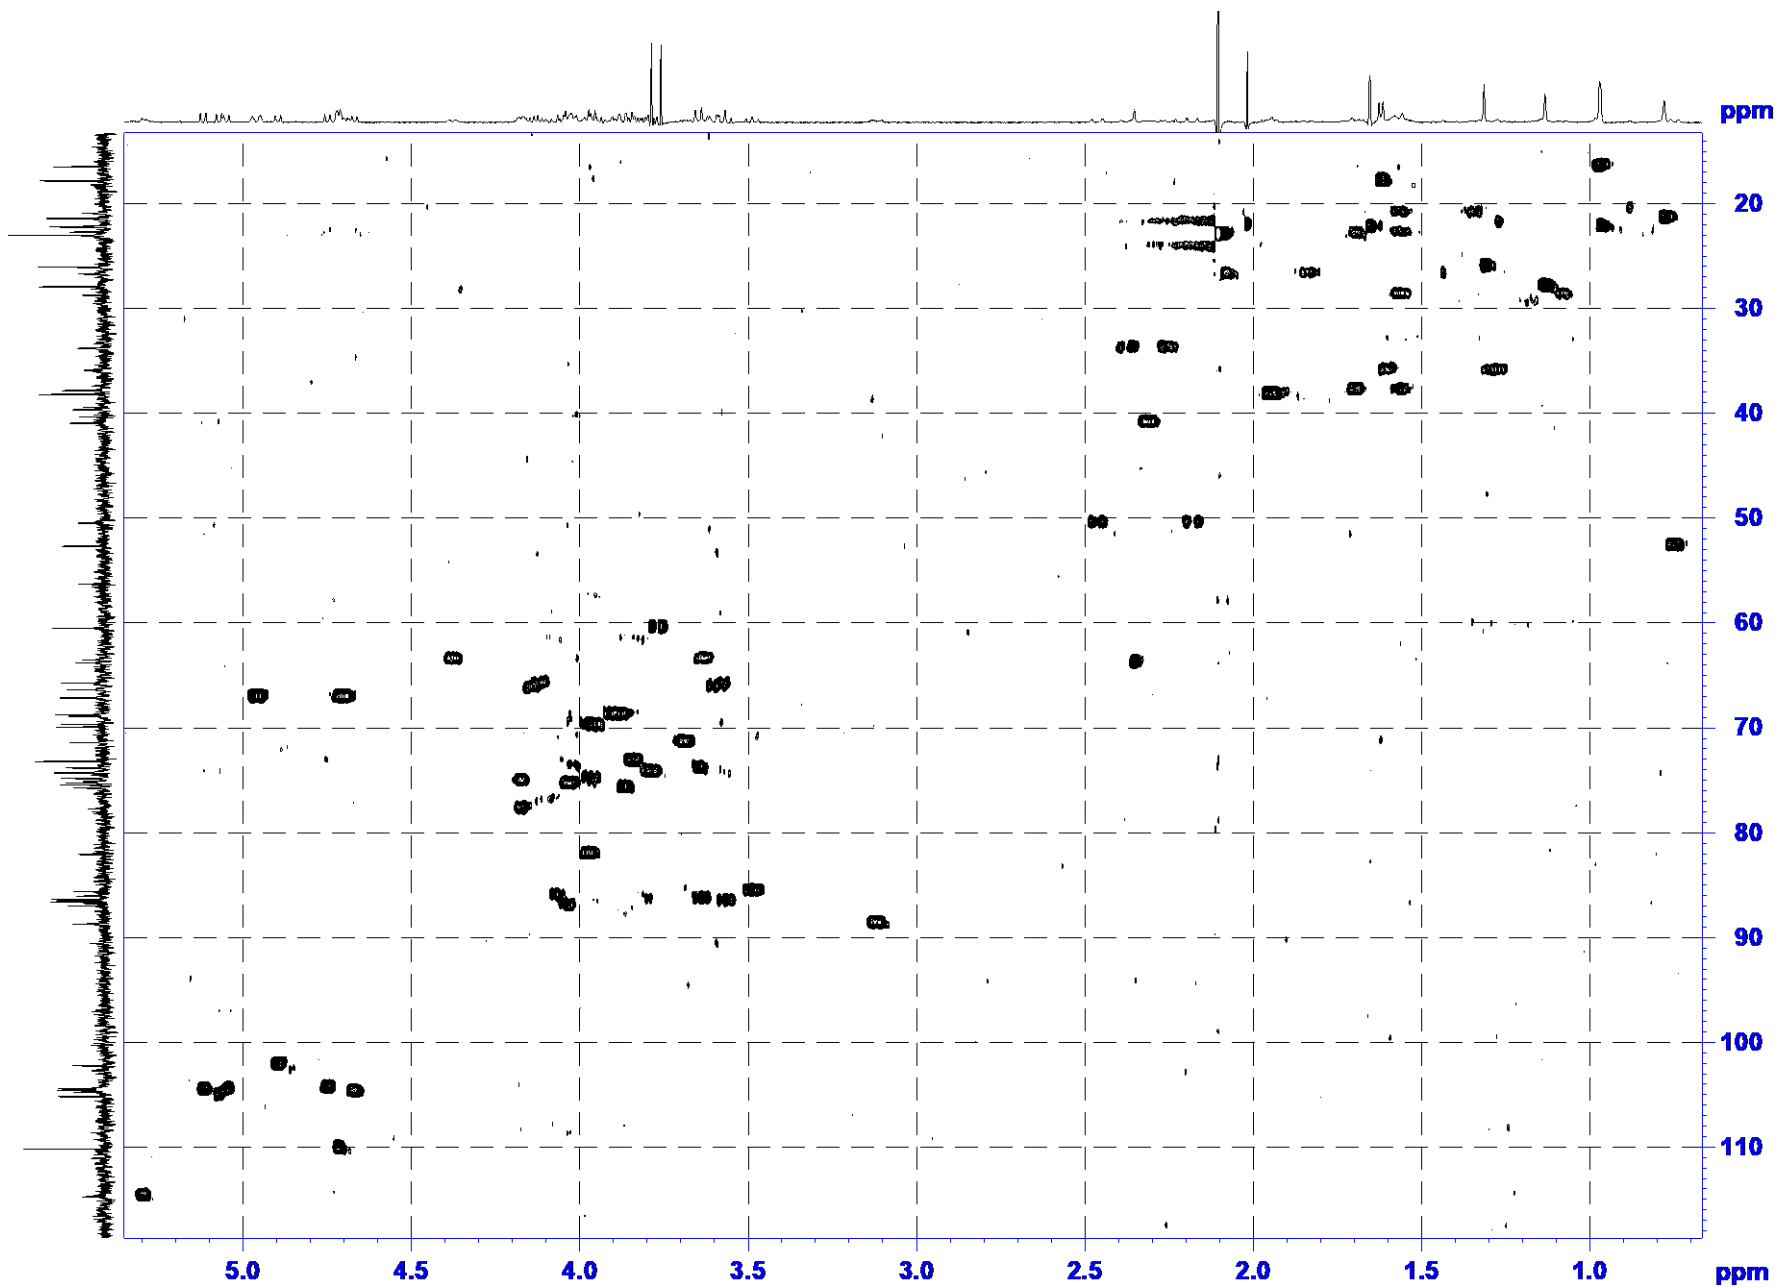

Figure S43. The HSQC (700.00 MHz) spectrum of chitonoidoside E (6) in  $\text{C}_5\text{D}_5\text{N}/\text{D}_2\text{O}$  (4/1)

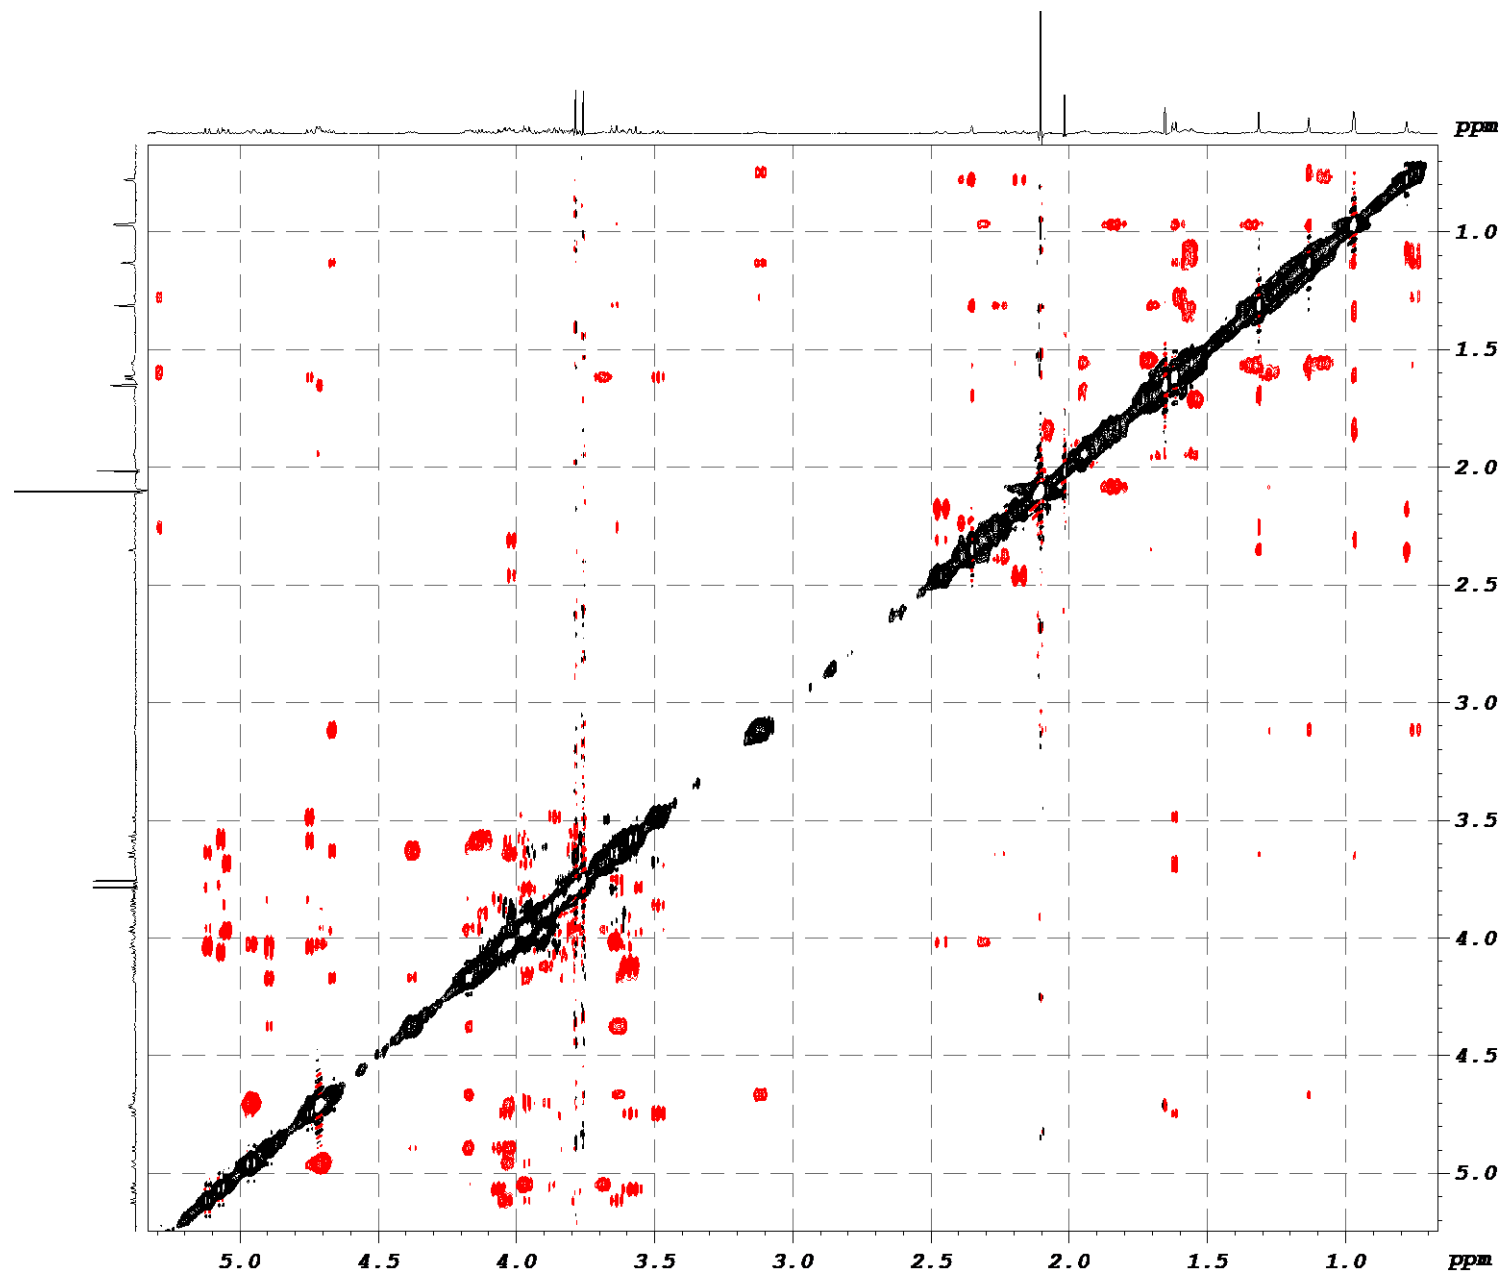

Figure S44. The ROESY (700.00 MHz) spectrum of chitonoidoside E (6) in C<sub>5</sub>D<sub>5</sub>N/D<sub>2</sub>O (4/1)

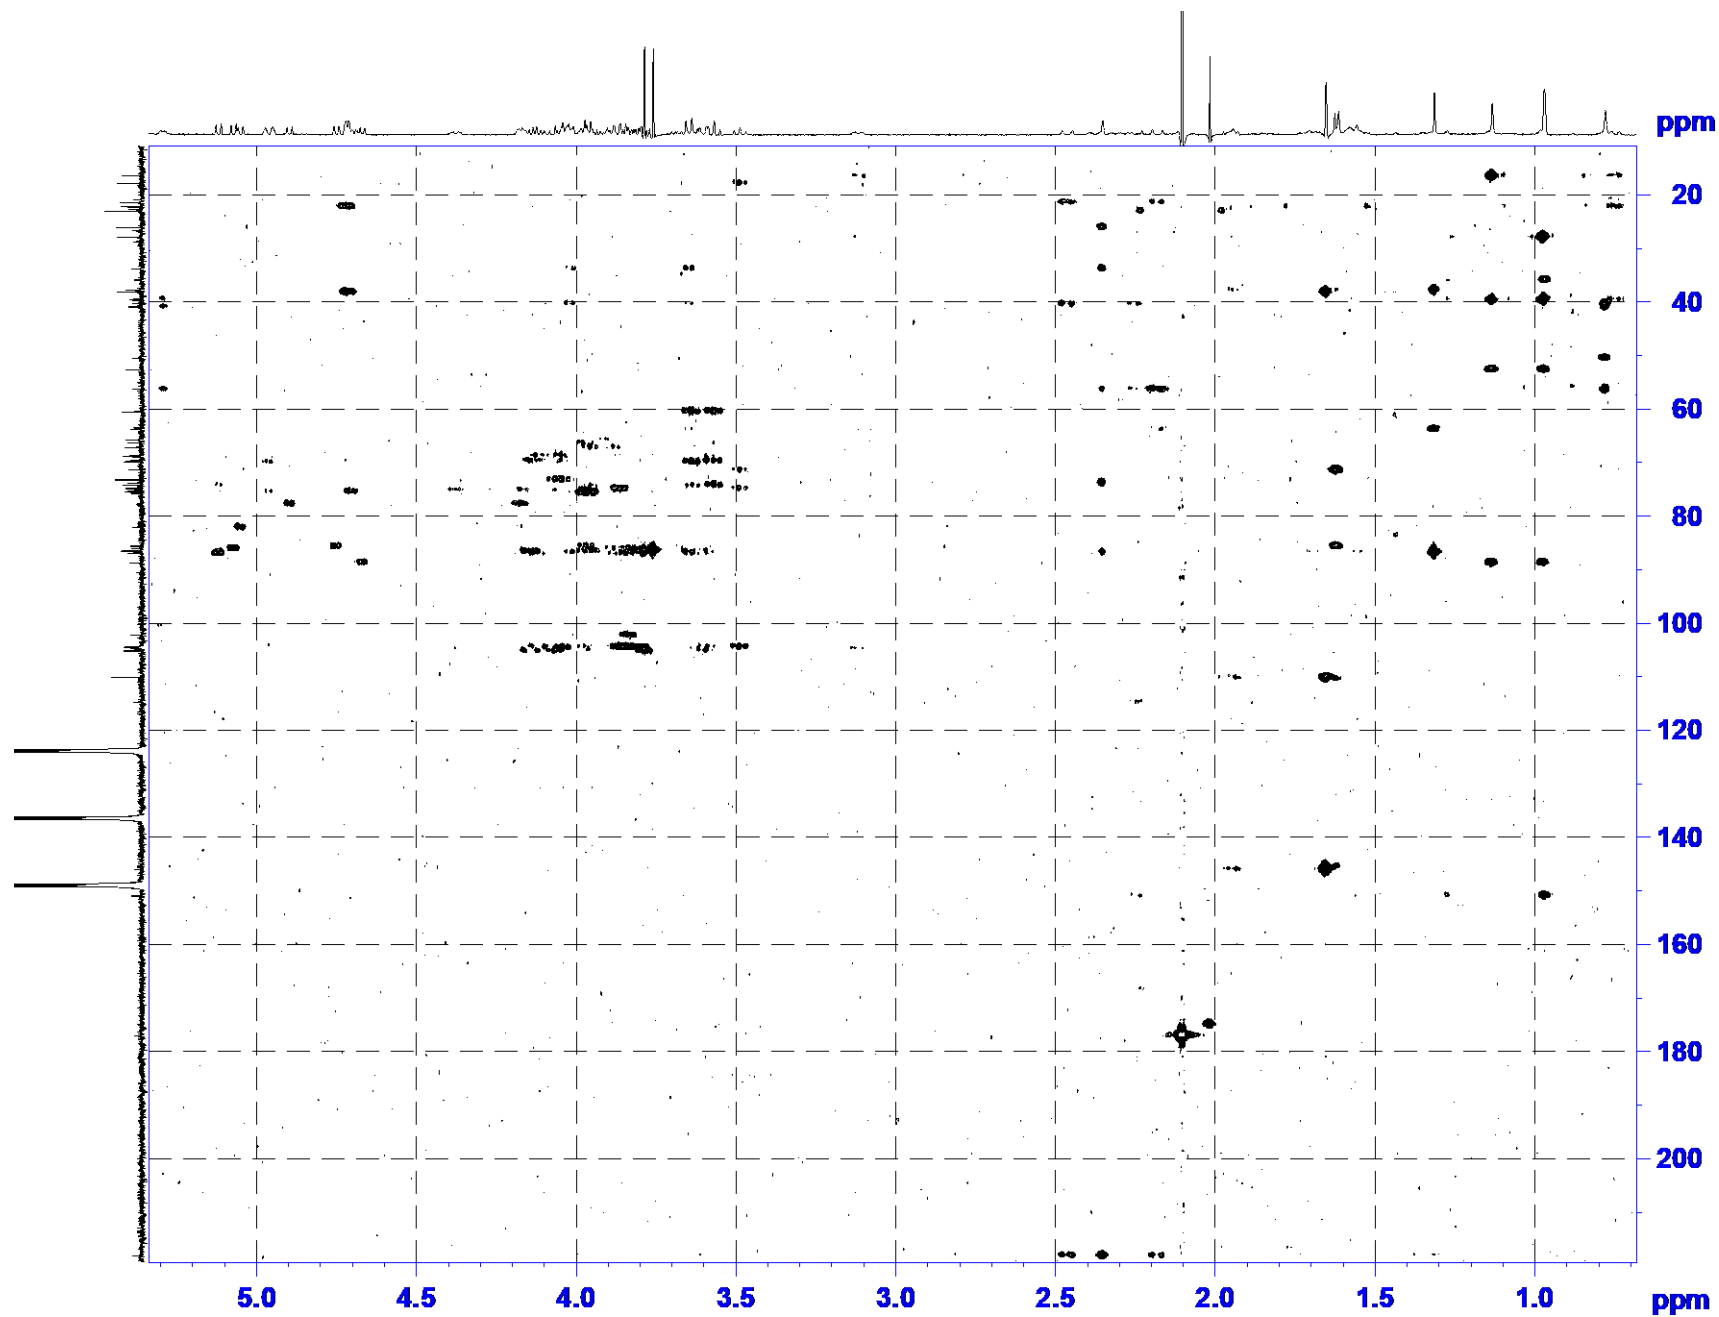

Figure S45. The HMBC (700.00 MHz) spectrum of chitonoidoside E (6) in  $\text{C}_5\text{D}_5\text{N}/\text{D}_2\text{O}$  (4/1)

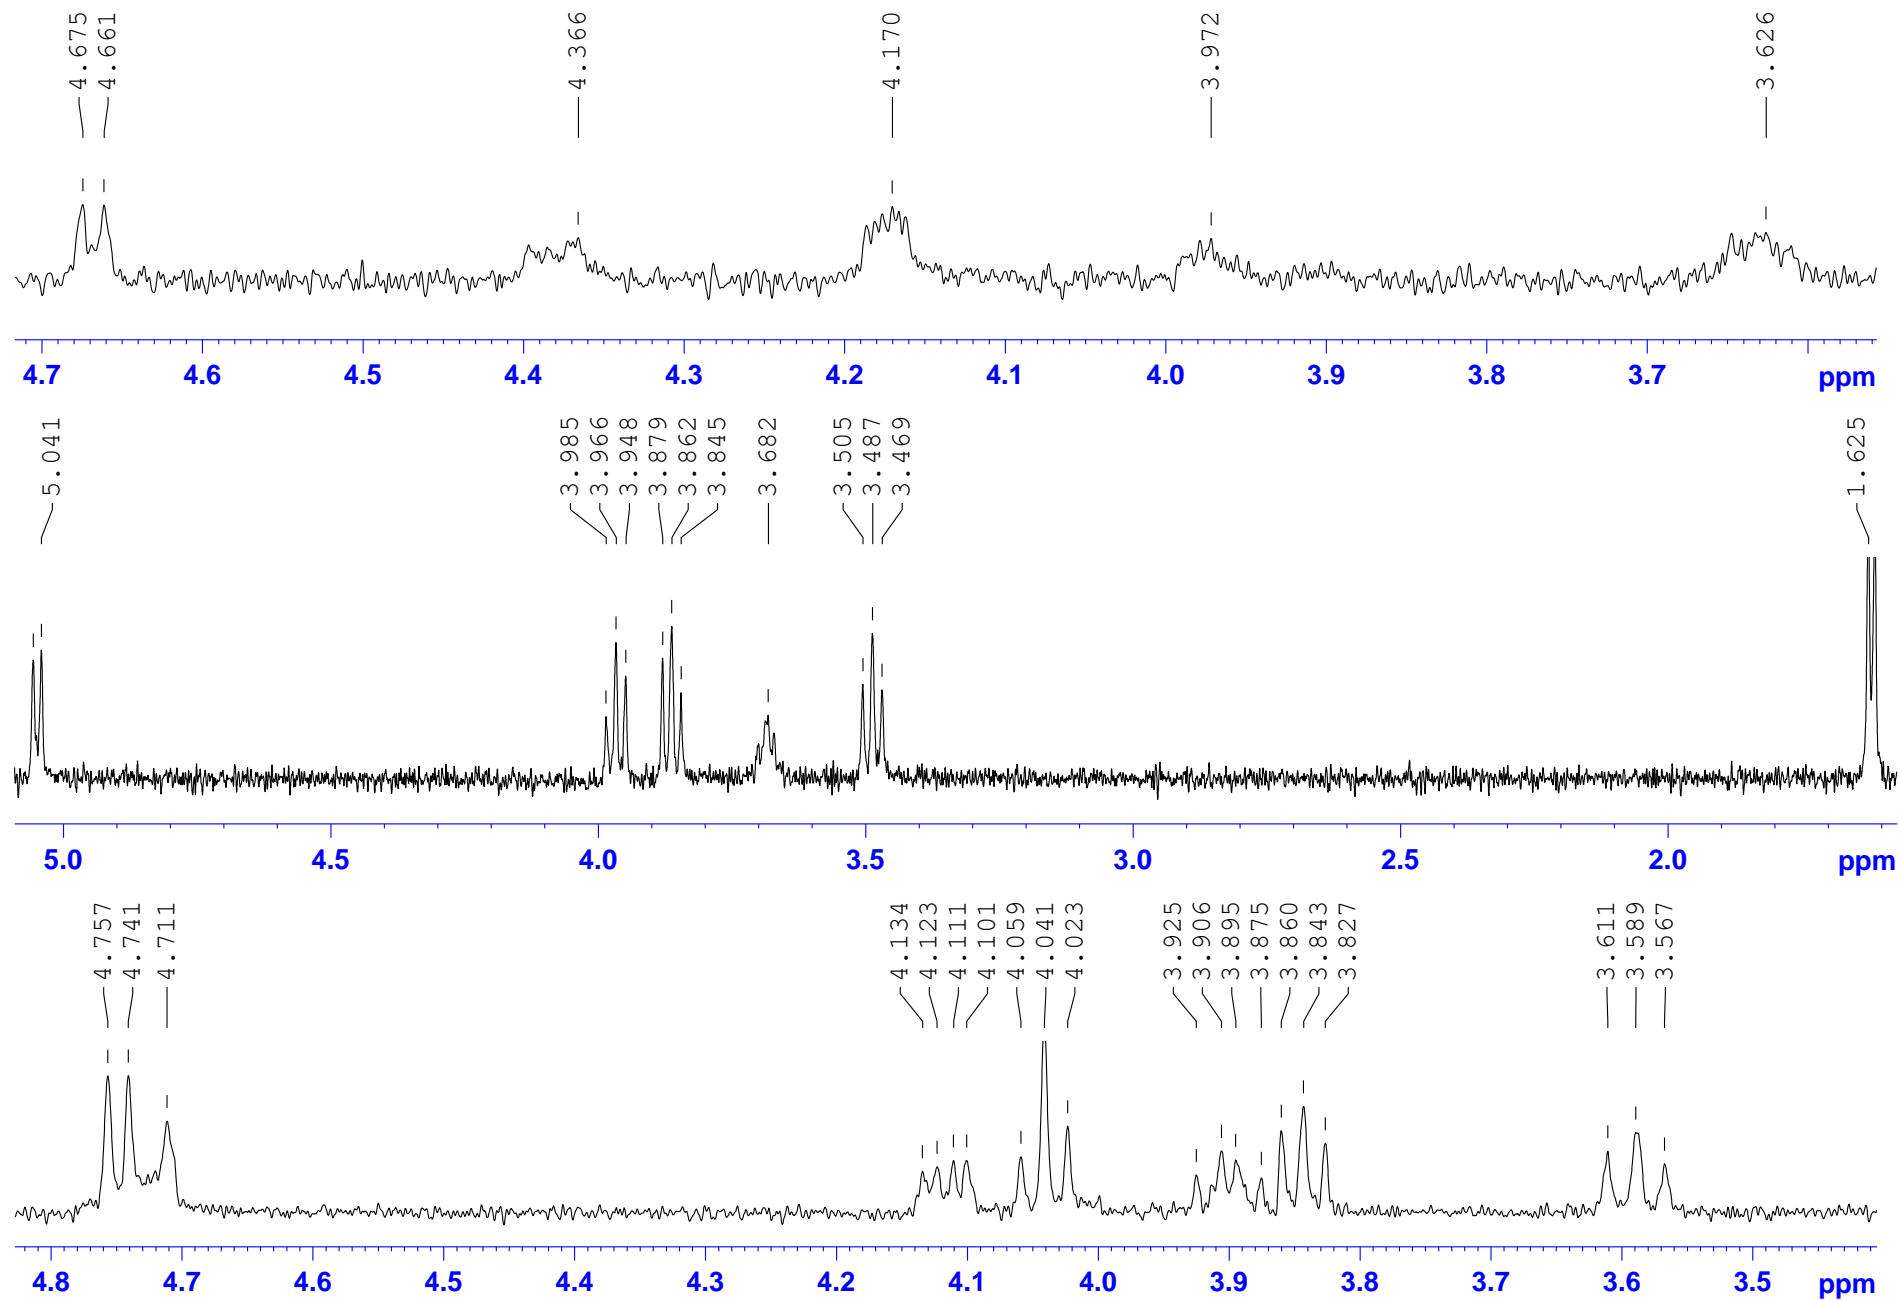

Figure S46. 1D TOCSY (700.00 MHz) spectra of Xyl1, Qui2 and Xyl3 of chitonoidoside E (**6**) in C<sub>5</sub>D<sub>5</sub>N/D<sub>2</sub>O (4/1)

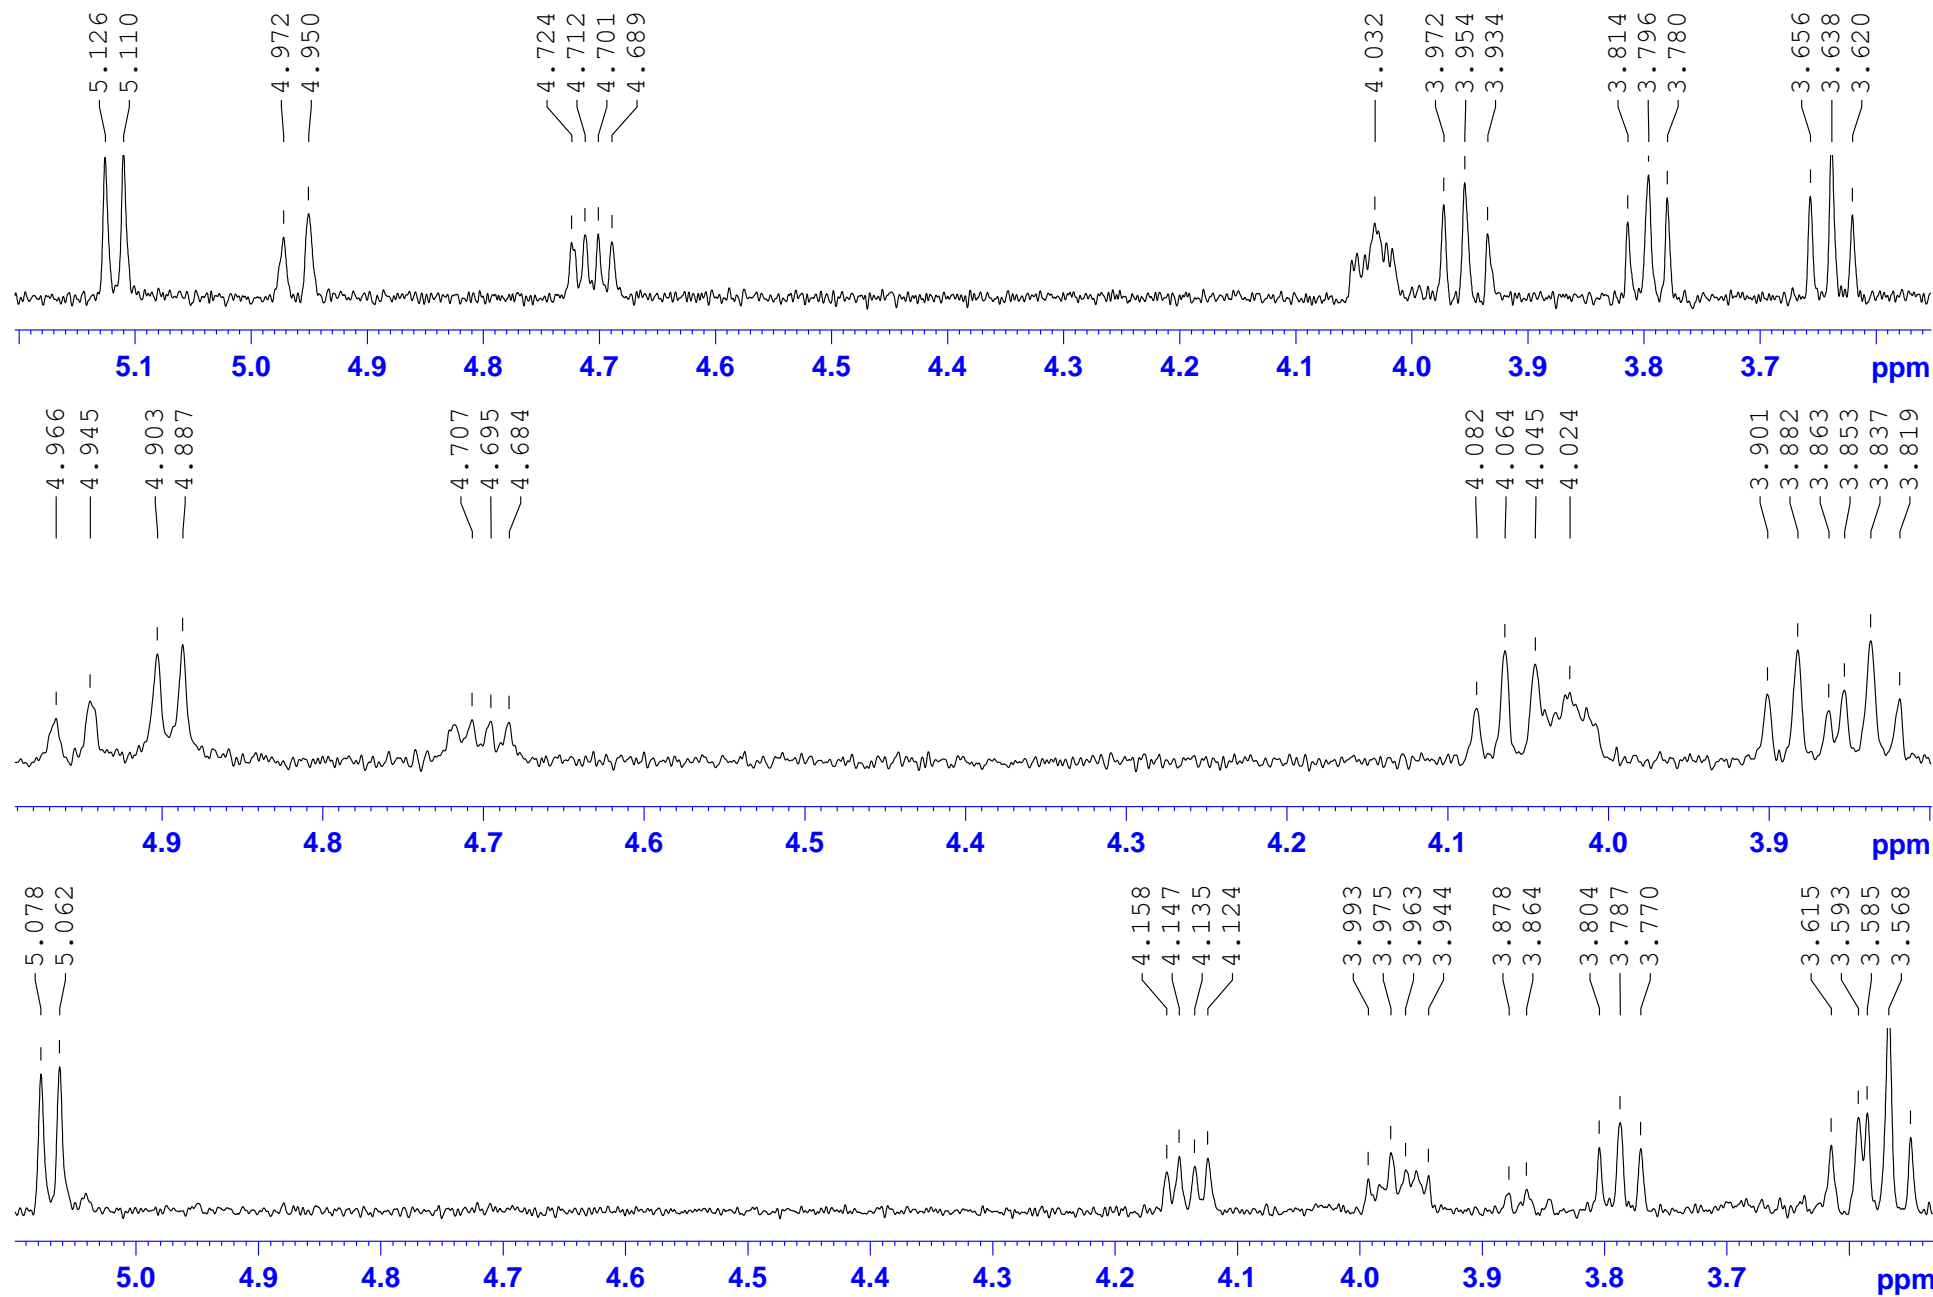

Figure S47. 1D TOCSY (700.00 MHz) spectra of MeGlc4, Glc5 and MeXyl6 of chitonoidoside E (6) in CsD<sub>5</sub>N/D<sub>2</sub>O (4/1)

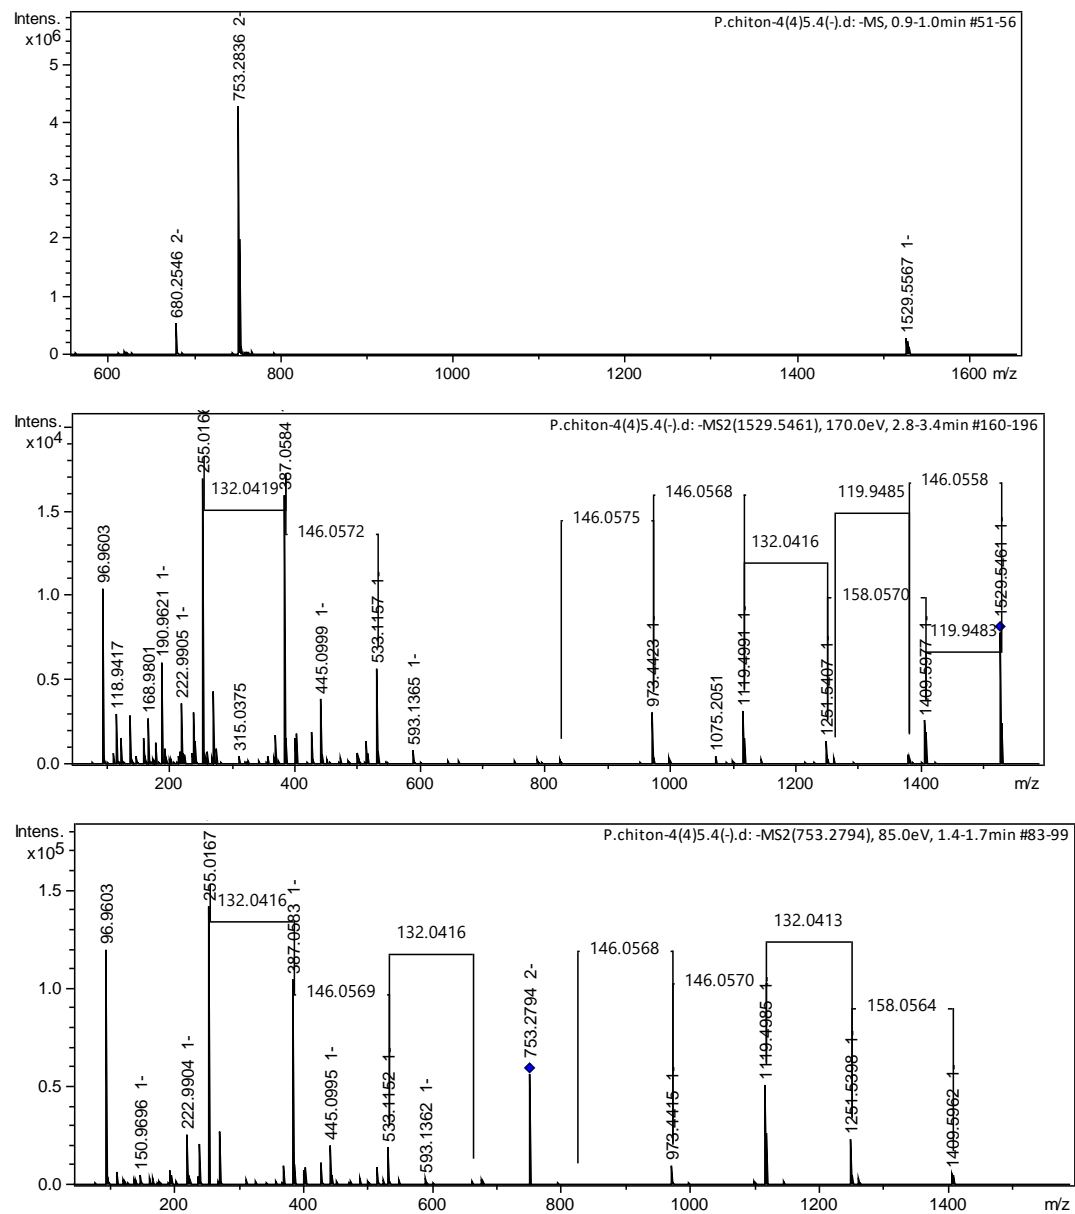

Figure S48. HR-ESI-MS and ESI-MS/MS spectra of chitonoidoside E (6)
